# Supplementary material for: Structural Basis of Type 2 Secretion System Engagement between the Inner and Outer Bacterial Membranes
Source: PubMed Central journal article supplement (PMC5646249; doi:10.1128/mbio.01344-17), 2017-10-17
Supplement: mbo005173525sf1.pdf [file mbo005173525sf1.pdf]

## Supplementary Figure S1

A

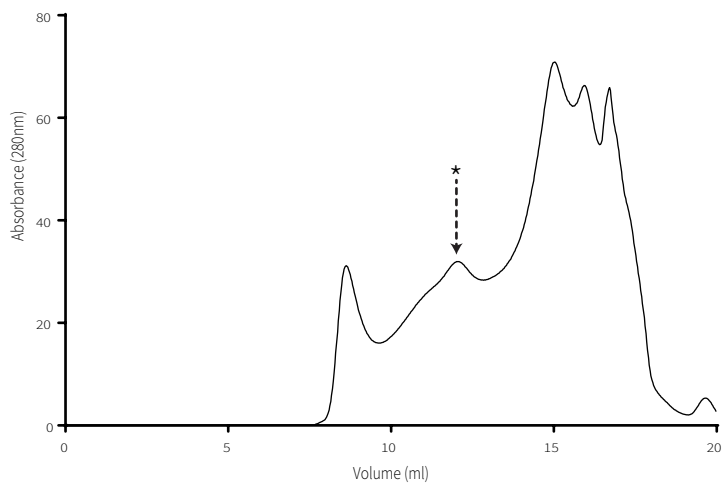

B

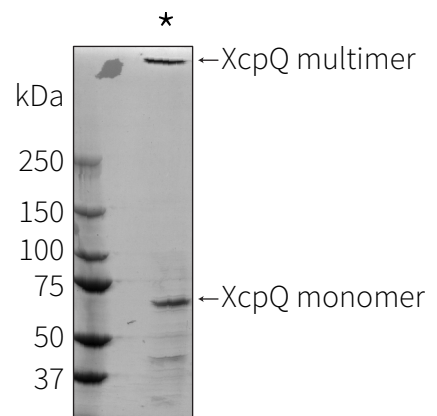

**Supplementary Figure S1.** Expression and purification of the XcpQ multimer. **(A)** Size-exclusion chromatograph of the Amphipol stabilised XcpQ multimer after extraction from the total cellular envelope fraction with detergent (SB3-14) and purified with nickel affinity chromatography. **(B)** The fractions marked \* were assessed by SDS-PAGE and prepared for assessment by electron microscopy as described in the supplemental methods
