# Supplementary material for: Structural Basis of Type 2 Secretion System Engagement between the Inner and Outer Bacterial Membranes
Source: PubMed Central journal article supplement (PMC5646249; doi:10.1128/mbio.01344-17), 2017-10-17
Supplement: mbo005173525sf3.pdf [file mbo005173525sf3.pdf]

Supplementary Figure S3

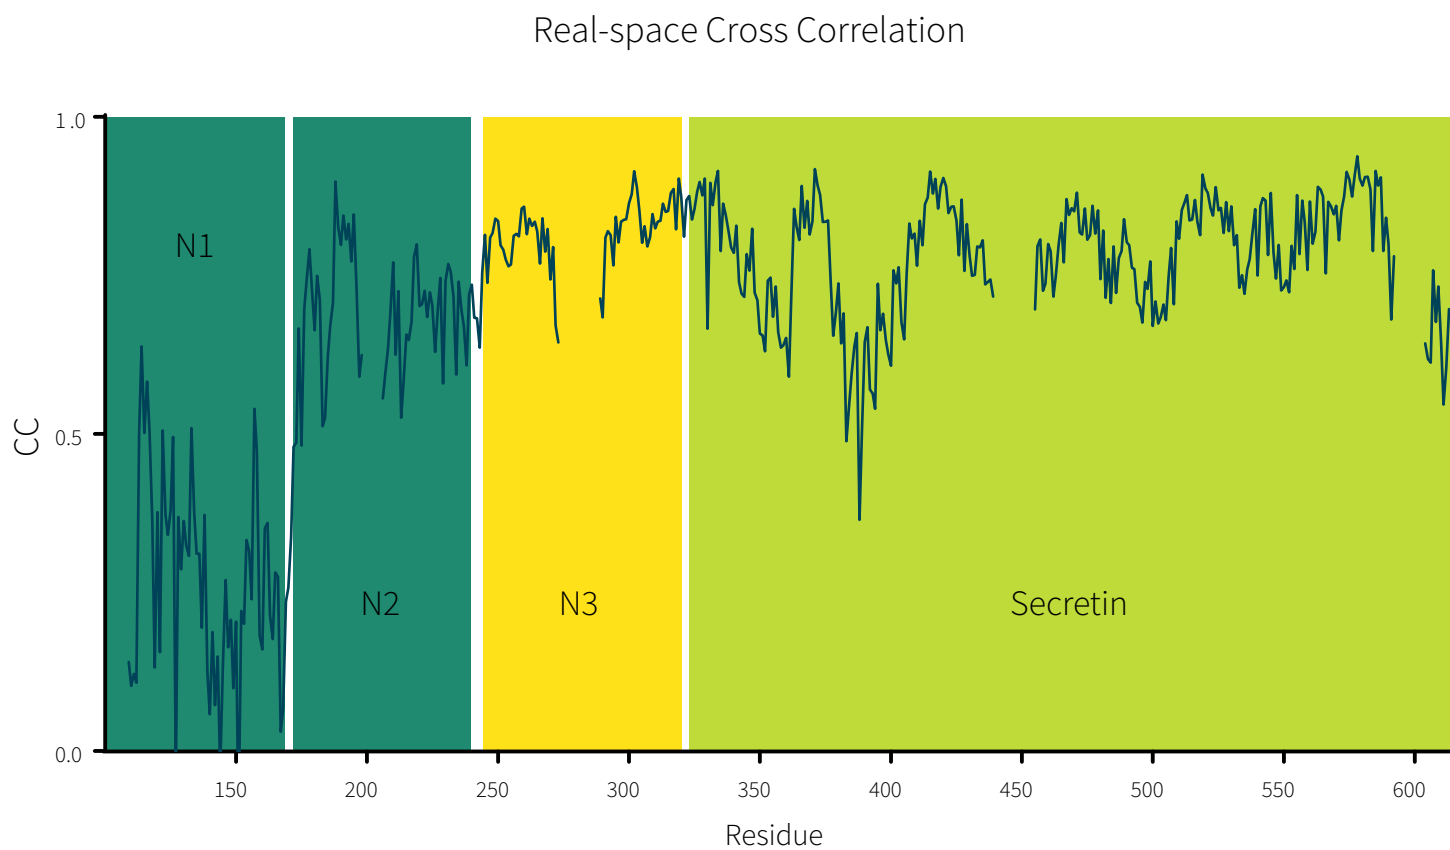

Supplementary Figure S3. Real-space Cross Correlation of the fit of the atomic model in to the electron density map
