# Supplementary material for: Structural Basis of Type 2 Secretion System Engagement between the Inner and Outer Bacterial Membranes
Source: PubMed Central journal article supplement (PMC5646249; doi:10.1128/mbio.01344-17), 2017-10-17
Supplement: mbo005173525st1.pdf [file mbo005173525st1.pdf]

*Pseudomonas aeruginosa/putida* XcpQ

| Entry      | Protein names                          | Gene names         | Organism                                                                                                                 | Length |
|------------|----------------------------------------|--------------------|--------------------------------------------------------------------------------------------------------------------------|--------|
| P35818     | Type II secretion system protein D     | xcpQ               | <i>Pseudomonas aeruginosa</i> (strain ATCC 15692 / DSM 22644 / CIP 104116 / JCM 14847 / LMG 12228 / 1C / PRS 101 / PAO1) | 658    |
| A0A023WT13 | General secretion pathway protein GspD | UIB01_13090        | <i>Pseudomonas stutzeri</i> ( <i>Pseudomonas perfectomarina</i> )                                                        | 644    |
| A0A031IS26 | Protein XcpQ                           | xcpQ BW43_04544    | <i>Pseudomonas</i> sp. RIT357                                                                                            | 633    |
| A0A061JVJ3 | General secretion pathway protein D    | B597_004215        | <i>Pseudomonas stutzeri</i> KOS6                                                                                         | 644    |
| A0A078LRA9 | General secretion pathway protein D    | xcpQ BN1079_01133  | <i>Pseudomonas sauidiphocaensis</i>                                                                                      | 751    |
| A0A083UI50 | General secretion pathway protein GspD | HA62_24155         | <i>Pseudomonas putida</i> ( <i>Arthrobacter siderocapsulatus</i> )                                                       | 642    |
| A0A086BZS6 | General secretion pathway protein GspD | G039_0308875       | <i>Pseudomonas aeruginosa</i> VRFPA01                                                                                    | 658    |
| A0A098FPU9 | Type II secretion system protein D     | xcpQ PXNS11_230067 | <i>Pseudomonas xanthomarina</i>                                                                                          | 645    |
| A0A099RQK4 | General secretion pathway protein GspD | DP64_14310         | <i>Pseudomonas</i> sp. HMP271                                                                                            | 749    |
| A0A0A1GCB6 | General secretion pathway protein D    | MT1_1942           | <i>Pseudomonas</i> sp. MT-1                                                                                              | 758    |
| A0A0A1HW65 | General secretion pathway protein D    | BN844_4825         | <i>Pseudomonas</i> sp. SHC52                                                                                             | 641    |
| A0A0A1YK28 | General secretion pathway protein GspD | TMS3_0112355       | <i>Pseudomonas taeanensis</i> MS-3                                                                                       | 650    |
| A0A0A4GLY0 | General secretion pathway protein GspD | N005_06695         | <i>Pseudomonas mediterranea</i> CFBP 5447                                                                                | 638    |
| A0A0A8RG33 | Type II secretion system protein D     | xcpQ1 PAMH19_1963  | <i>Pseudomonas aeruginosa</i>                                                                                            | 702    |
| A0A0A8RQQ6 | Type II secretion system protein D     | xcpQ3 PAMH19_5274  | <i>Pseudomonas aeruginosa</i>                                                                                            | 776    |
| A0A0C2F3Y4 | General secretion pathway protein D    | UCMB321_0557       | <i>Pseudomonas batumici</i>                                                                                              | 622    |
| A0A0C2SCW4 | General secretion pathway protein GspD | QX25_03625         | <i>Pseudomonas stutzeri</i> ( <i>Pseudomonas perfectomarina</i> )                                                        | 746    |
| A0A0C5EF45 | Uncharacterized protein                | TO66_26230         | <i>Pseudomonas</i> sp. MRSN12121                                                                                         | 632    |
| A0A0D0MPK9 | General secretion pathway protein GspD | RL74_21425         | <i>Pseudomonas fluorescens</i>                                                                                           | 638    |
| A0A0D6BKU1 | General secretion pathway protein D    | gspD4 POS17_3902   | <i>Pseudomonas</i> sp. Os17                                                                                              | 639    |
| A0A0D6S4G0 | General secretion pathway protein D    | SZ55_4490          | <i>Pseudomonas</i> sp. FeS53a                                                                                            | 632    |
| A0A0D6SHG7 | General secretion pathway protein D    | SZ55_3386          | <i>Pseudomonas</i> sp. FeS53a                                                                                            | 644    |
| A0A0D9AKT1 | General secretion pathway protein GspD | UF78_12255         | <i>Pseudomonas stutzeri</i> ( <i>Pseudomonas perfectomarina</i> )                                                        | 757    |
| A0A0E1AVX8 | General secretion pathway protein D    | U769_09375         | <i>Pseudomonas aeruginosa</i> MTB-1                                                                                      | 657    |
| A0A0E1EAU8 | General secretion pathway protein GspD | EY04_26175         | <i>Pseudomonas chlororaphis</i>                                                                                          | 633    |
| A0A0F4TSD0 | General secretion pathway protein GspD | VC35_10020         | <i>Pseudomonas fluorescens</i>                                                                                           | 639    |
| A0A0F4XGY0 | General secretion pathway protein GspD | VP02_23980         | <i>Pseudomonas kilonensis</i>                                                                                            | 649    |

|            |                                                                             |                                          |                                                                    |     |
|------------|-----------------------------------------------------------------------------|------------------------------------------|--------------------------------------------------------------------|-----|
| A0A0H3YW05 | General secretion pathway protein D (Type II secretion system protein GspD) | AB691_2648<br>AYK87_07600<br>BFM99_20650 | <i>Pseudomonas stutzeri</i> ( <i>Pseudomonas perfectomarina</i> )  | 644 |
| A0A0J6GCJ4 | General secretion pathway protein D                                         | SAMN04489800_0495                        | <i>Pseudomonas deceptionensis</i>                                  | 641 |
| A0A0J6GPS7 | General secretion pathway protein GspD                                      | TU78_17680                               | <i>Pseudomonas taetrolens</i>                                      | 633 |
| A0A0J6IH51 | General secretion pathway protein GspD                                      | TU84_01370                               | <i>Pseudomonas helleri</i>                                         | 638 |
| A0A0M2UNX6 | General secretion pathway protein GspD                                      | V520_02135                               | <i>Pseudomonas putida</i> KG-4                                     | 613 |
| A0A0M3CLH3 | General secretion pathway protein GspD                                      | PU99_26825                               | <i>Pseudomonas putida</i> ( <i>Arthrobacter siderocapsulatus</i> ) | 642 |
| A0A0M4QBX2 | Type II secretion system protein GspD                                       | AOC04_18600<br>BOH73_11500               | <i>Pseudomonas versuta</i>                                         | 640 |
| A0A0N0E5F6 | Type II secretion system protein D                                          | PF66_01114                               | <i>Pseudomonas fuscovaginae</i>                                    | 632 |
| A0A0N9VP76 | Type II secretion system protein GspD                                       | AO353_12545                              | <i>Pseudomonas fluorescens</i>                                     | 632 |
| A0A0N9X7D9 | Type II secretion system protein GspD                                       | AO356_09345                              | <i>Pseudomonas fluorescens</i>                                     | 641 |
| A0A0P7CVI4 | Type II secretion system protein GspD                                       | HB4184_20700                             | <i>Pseudomonas putida</i> ( <i>Arthrobacter siderocapsulatus</i> ) | 613 |
| A0A0P8WQ89 | Type II secretion system protein D                                          | gspD AN403_2294                          | <i>Pseudomonas fluorescens</i>                                     | 639 |
| A0A0Q0SXX2 | Type II secretion system protein GspD                                       | AQS70_04715                              | <i>Pseudomonas endophytica</i>                                     | 638 |
| A0A0Q4NJA7 | Type II secretion system protein GspD                                       | ASF02_02265                              | <i>Pseudomonas</i> sp. Leaf58                                      | 613 |
| A0A0Q4S6T2 | Type II secretion system protein GspD                                       | ASF15_18080                              | <i>Pseudomonas</i> sp. Leaf83                                      | 650 |
| A0A0Q8BB55 | Type II secretion system protein GspD                                       | ASD60_01415                              | <i>Pseudomonas</i> sp. Root562                                     | 642 |
| A0A0Q8I0W2 | Type II secretion system protein GspD                                       | ASD91_08965                              | <i>Pseudomonas</i> sp. Root68                                      | 639 |
| A0A0R0CYU5 | General secretion pathway protein GspD                                      | ABB27_03470                              | <i>Stenotrophomonas terrae</i>                                     | 639 |
| A0A0S8YUJ4 | Type II secretion system protein GspD                                       | ASE98_07450                              | <i>Pseudomonas</i> sp. Leaf48                                      | 639 |
| A0A0T6UMT5 | Type II secretion system protein GspD                                       | AO726_11305                              | <i>Pseudomonas</i> sp. TTU2014-080ASC                              | 638 |
| A0A0T6UP61 | Type II secretion system protein GspD                                       | AO726_12045                              | <i>Pseudomonas</i> sp. TTU2014-080ASC                              | 650 |
| A0A0T6V454 | Type II secretion system protein GspD                                       | AO741_16310                              | <i>Pseudomonas</i> sp. TTU2014-105ASC                              | 644 |
| A0A0T6VHL7 | Type II secretion system protein GspD                                       | AO735_18130                              | <i>Pseudomonas</i> sp. TTU2014-096BSC                              | 748 |
| A0A0T6VRR0 | Type II secretion system protein GspD                                       | AO729_13020                              | <i>Pseudomonas</i> sp. TTU2014-066ASC                              | 746 |
| A0A0V2R4Y0 | Type II secretion system protein GspD                                       | AO896_11040                              | <i>Pseudomonas aeruginosa</i>                                      | 634 |
| A0A0V2RM22 | Type II secretion system protein GspD                                       | AO896_00185                              | <i>Pseudomonas aeruginosa</i>                                      | 769 |
| A0A0X1T5Y3 | Type II secretion system protein GspD                                       | AWM79_20160                              | <i>Pseudomonas agarici</i>                                         | 636 |
| A0A126NHM6 | Type II secretion system protein GspD                                       | AXG53_06935                              | <i>Stenotrophomonas</i> sp. KCTC 12332                             | 639 |
| A0A142BAN4 | General secretion pathway protein D                                         | gspD2 EZMO1_1659                         | <i>Endozoicomonas montiporae</i> CL-33                             | 708 |
| A0A142IQK5 | Type II secretion system protein GspD                                       | A0T30_09500                              | <i>Pseudomonas alcaligenes</i>                                     | 652 |
| A0A165PV67 | Type II secretion system protein GspD                                       | A3710_08510                              | <i>Pseudomonas stutzeri</i> ( <i>Pseudomonas perfectomarina</i> )  | 646 |
| A0A165ZVV4 | Type II secretion system protein GspD                                       | TK06_18730                               | <i>Pseudomonas fluorescens</i>                                     | 640 |

|            |                                                     |                     |                                                                    |     |
|------------|-----------------------------------------------------|---------------------|--------------------------------------------------------------------|-----|
| A0A176NN03 | Type II secretion system protein GspD               | APS14_01435         | <i>Pseudomonas thivervalensis</i>                                  | 644 |
| A0A177YAX0 | Type II secretion system protein GspD               | A3K88_08850         | <i>Pseudomonas putida</i> ( <i>Arthrobacter siderocapsulatus</i> ) | 613 |
| A0A1B3CJZ2 | Type II secretion system protein GspD               | AXG94_17335         | <i>Pseudomonas corrugata</i>                                       | 638 |
| A0A1B3CKV1 | Type II secretion system protein GspD               | A7317_01340         | <i>Pseudomonas fluorescens</i>                                     | 633 |
| A0A1B3E4W5 | General secretion pathway protein GspD              | THL1_2032           | <i>Pseudomonas</i> sp. TCU-HL1                                     | 655 |
| A0A1B3EDE9 | General secretion pathway protein GspD              | THL1_5039           | <i>Pseudomonas</i> sp. TCU-HL1                                     | 631 |
| A0A1C2DBX4 | Type II secretion system protein GspD               | BB109_20520         | <i>Pseudomonas xanthomarina</i>                                    | 747 |
| A0A1D9IMH7 | Type II secretion system protein GspD               | AA042_12040         | <i>Pseudomonas</i> sp. BS-2016                                     | 628 |
| A0A1E4UU08 | Type II secretion system protein GspD               | A7D25_20305         | <i>Pseudomonas</i> sp. 21C1                                        | 652 |
| A0A1E4V6S2 | Type II secretion system protein GspD               | A7D27_24935         | <i>Pseudomonas</i> sp. 1D4                                         | 632 |
| A0A1E4VDD8 | Type II secretion system protein GspD               | A7D27_16970         | <i>Pseudomonas</i> sp. 1D4                                         | 644 |
| A0A1E4VYV2 | Type II secretion system protein GspD               | A7D27_01330         | <i>Pseudomonas</i> sp. 1D4                                         | 776 |
| A0A1G3DZJ5 | Type II secretion system protein GspD               | A3J71_12570         | <i>Pseudomonadales</i> bacterium<br>RIFCSPHIGHO2_02_FULL_60_43     | 763 |
| A0A1G3E9I4 | Type II secretion system protein GspD               | A2Y50_01105         | <i>Pseudomonadales</i> bacterium RIFCSPLOWO2_12_59_9               | 646 |
| A0A1G3ED51 | Type II secretion system protein GspD               | A3J71_18675         | <i>Pseudomonadales</i> bacterium<br>RIFCSPHIGHO2_02_FULL_60_43     | 649 |
| A0A1G3FQK4 | Type II secretion system protein GspD<br>(Fragment) | A3J25_17450         | <i>Pseudomonadales</i> bacterium<br>RIFCSPLOWO2_02_FULL_63_210     | 533 |
| A0A1G6U0Y4 | General secretion pathway protein D                 | SAMN05216575_101364 | <i>Pseudomonas alcaliphila</i>                                     | 647 |
| A0A1G7HUH1 | General secretion pathway protein D                 | SAMN05216575_105187 | <i>Pseudomonas alcaliphila</i>                                     | 744 |
| A0A1G7WX13 | General secretion pathway protein D                 | SAMN05216605_10388  | <i>Pseudomonas abietaniphila</i>                                   | 633 |
| A0A1H1QT23 | General secretion pathway protein D                 | SAMN05216598_1040   | <i>Pseudomonas asplenii</i>                                        | 635 |
| A0A1H1RCS0 | General secretion pathway protein D                 | SAMN05216585_1966   | <i>Pseudomonas chlororaphis</i>                                    | 633 |
| A0A1H2PBG3 | General secretion pathway protein D                 | SAMN05216558_4746   | <i>Pseudomonas vancouverensis</i>                                  | 639 |
| A0A1H4WEB1 | General secretion pathway protein D                 | SAMN04490188_0326   | <i>Pseudomonas kilonensis</i>                                      | 642 |
| A0A1H7RLY4 | General secretion pathway protein D                 | SAMN05216214_11532  | <i>Pseudomonas hussainii</i>                                       | 777 |
| A0A1I0UI39 | General secretion pathway protein D                 | SAMN05216263_11343  | <i>Pseudomonas otitidis</i>                                        | 774 |
| A0A1I5RAR9 | General secretion pathway protein D                 | SAMN05216601_11512  | <i>Pseudomonas composti</i>                                        | 645 |
| A0A1K1PZ44 | General secretion pathway protein D                 | SAMN03159439_02495  | <i>Pseudomonas</i> sp. NFACC04-2                                   | 641 |
| A0A1K1RH77 | General secretion pathway protein D                 | SAMN05660640_02933  | <i>Pseudomonas</i> sp. NFACC16-2                                   | 640 |
| A0A1M5RTG2 | General secretion pathway protein D                 | SAMN02744645_3240   | <i>Pseudomonas xanthomarina</i> DSM 18231                          | 756 |
| A0A1N6ZH02 | General secretion pathway protein D                 | SAMN05421672_11829  | <i>Pseudomonas flexibilis</i>                                      | 640 |
| A0A1Q8EJE0 | Type II secretion system protein GspD               | BTN82_24540         | <i>Pseudomonas chlororaphis</i>                                    | 633 |
| A0A1R0GC92 | Type II secretion system protein GspD               | AU074_25590         | <i>Pseudomonas</i> sp. ATCC PTA-122608                             | 631 |

|            |                                        |                              |                                                                   |     |
|------------|----------------------------------------|------------------------------|-------------------------------------------------------------------|-----|
| A0A1T1HIA7 | Type II secretion system protein GspD  | MF4836_33190                 | <i>Pseudomonas</i> sp. MF4836                                     | 635 |
| A4XWG6     | General secretion pathway protein D    | Pmen_2927                    | <i>Pseudomonas mendocina</i> (strain ymp)                         | 645 |
| A4XZZ1     | General secretion pathway protein D    | Pmen_4160                    | <i>Pseudomonas mendocina</i> (strain ymp)                         | 748 |
| F4DZZ5     | General secretion pathway protein D    | MDS_1730                     | <i>Pseudomonas mendocina</i> (strain NK-01)                       | 647 |
| G8Q2P1     | XcpQ                                   | xcpQ PSF113_0438             | <i>Pseudomonas fluorescens</i> F113                               | 646 |
| I3UUA8     | General secretion pathway protein D    | YSA_04271                    | <i>Pseudomonas putida</i> ND6                                     | 613 |
| I4JMM4     | General secretion pathway protein D    | YO5_15425                    | <i>Pseudomonas stutzeri</i> TS44                                  | 749 |
| J2E945     | General secretion pathway protein D    | xcpQ Pchl3084_4936           | <i>Pseudomonas chlororaphis</i> subsp. <i>aureofaciens</i> 30-84  | 633 |
| J2F8L3     | General secretion pathway protein D    | gspD PfiQ2_5268              | <i>Pseudomonas fluorescens</i> Q2-87                              | 637 |
| J2N6L1     | General secretion pathway protein D    | PMI20_01446                  | <i>Pseudomonas</i> sp. GM17                                       | 633 |
| J2QYI9     | General secretion pathway protein D    | PMI26_03562                  | <i>Pseudomonas</i> sp. GM33                                       | 642 |
| J2RHM2     | General secretion pathway protein D    | PMI28_04085                  | <i>Pseudomonas</i> sp. GM48                                       | 639 |
| J2UI02     | General secretion pathway protein D    | PMI32_00650                  | <i>Pseudomonas</i> sp. GM60                                       | 642 |
| J3HG02     | General secretion pathway protein D    | PMI34_01316                  | <i>Pseudomonas</i> sp. GM74                                       | 639 |
| K5Y9A9     | General secretion pathway protein D    | C211_12597                   | <i>Pseudomonas</i> sp. Chol1                                      | 749 |
| L0GNZ0     | General secretion pathway protein D    | Psest_2577                   | <i>Pseudomonas stutzeri</i> RCH2                                  | 644 |
| L8MFP5     | General secretion pathway protein D    | KF707C_50390<br>ppKF707_4261 | <i>Pseudomonas pseudoalcaligenes</i> KF707 = NBRC 110670          | 632 |
| L8MP58     | General secretion pathway protein D    | KF707C_35460<br>ppKF707_1735 | <i>Pseudomonas pseudoalcaligenes</i> KF707 = NBRC 110670          | 646 |
| O52657     | XqhA                                   | xqhA                         | <i>Pseudomonas aeruginosa</i>                                     | 713 |
| Q9ZFY0     | Outer membrane secretion protein Q     | xcpQ                         | <i>Pseudomonas alcaligenes</i>                                    | 649 |
| S6BFC1     | Type II secretion system protein XcpQ  | xcpQ PCA10_20220             | <i>Pseudomonas resinovorans</i> NBRC 106553                       | 650 |
| U2BF23     | General secretion pathway protein D    | N878_13960                   | <i>Pseudomonas</i> sp. EGD-AK9                                    | 648 |
| U2UKR4     | Uncharacterized protein                | O999_25585                   | <i>Pseudomonas putida</i> LF54                                    | 612 |
| U3H3Q0     | General secretion pathway protein D    | L682_26640                   | <i>Pseudomonas alcaligenes</i> OT 69                              | 632 |
| U3HCK6     | General secretion pathway protein D    | L682_10325                   | <i>Pseudomonas alcaligenes</i> OT 69                              | 652 |
| U3HG92     | Uncharacterized protein                | L682_10935                   | <i>Pseudomonas alcaligenes</i> OT 69                              | 789 |
| U3HNS7     | General secretion pathway protein D    | L686_22905                   | <i>Pseudomonas stutzeri</i> MF28                                  | 756 |
| W6VIN1     | General secretion pathway protein D    | PMI25_001461                 | <i>Pseudomonas</i> sp. GM30                                       | 630 |
| W8Q6K7     | General secretion pathway protein GspD | CD58_02160                   | <i>Pseudomonas brassicacearum</i>                                 | 641 |
| W8RVF2     | General secretion pathway protein GspD | CH92_13350                   | <i>Pseudomonas stutzeri</i> ( <i>Pseudomonas perfectomarina</i> ) | 756 |
| W9TIK1     | General secretion pathway protein D    | xcpQ BAY1663_00422           | <i>Pseudomonas</i> sp. BAY1663                                    | 644 |

## Marine bacteria (Alteromonadales and Oceanospirillales)

| Entry      | Protein names                                                                                     | Gene names            | Organism                        | Length |
|------------|---------------------------------------------------------------------------------------------------|-----------------------|---------------------------------|--------|
| A0A139DF37 | General secretion pathway protein D, GspD                                                         | AWU57_3477            | Marinobacter sp. T13-3          | 528    |
| A0A1H5W723 | General secretion pathway protein D                                                               | SAMN04489856_103226   | Oleiphilus messinensis          | 633    |
| A0A0K6INX8 | Type II secretion system protein D                                                                | Ga0061065_10887       | Marinomonas fungiae             | 629    |
| A0A1A8TG45 | Type II secretion system protein D                                                                | xcpQ MAQ5080_02254    | Marinomonas aquimarina          | 631    |
| A0A1A8TSZ0 | Type II secretion system protein D                                                                | xcpQ MSP8886_04318    | Marinomonas spartinae           | 616    |
| A0A1C3JN30 | Type II secretion system protein D                                                                | xcpQ MGA5115_00632    | Marinomonas gallaica            | 629    |
| A3YCA1     | General secretion pathway protein D                                                               | MED121_18255          | Marinomonas sp. MED121          | 616    |
| A0A095S6V4 | General (Type II) secretion pathway protein D                                                     | T9A_02950             | Alcanivorax jadensis T9         | 686    |
| A0A0C5VT74 | Type II secretory pathway, component PulD                                                         | YC6258_04496          | Gynuella sunshinyii YC6258      | 625    |
| A0A0H4I1Z9 | General secretion pathway protein GspD                                                            | ABA45_04945           | Marinobacter psychrophilus      | 640    |
| A0A0J7M1M9 | Type II secretion system protein D                                                                | Msub_11189            | Marinobacter subterrani         | 651    |
| A0A0K1UFK8 | General secretion pathway protein GspD                                                            | ACP86_01965           | Marinobacter sp. CP1            | 650    |
| A0A0P1IZV8 | General secretion pathway protein D / Type II secretion outermembrane pore forming protein (PulD) | BN2364_1649           | Alcanivorax dieselolei          | 701    |
| A0A0P7ZJQ0 | Type II secretion system protein D                                                                | gspD HLUCCX14_05135   | Marinobacter excellens HL-55    | 652    |
| A0A0P8B2W9 | T2SS system secretin GspD                                                                         | gspD-2 HLUCCO03_15260 | Marinobacter sp. HL-58          | 650    |
| A0A0T6W2J7 | Type II secretion system protein GspD                                                             | AQ621_12235           | Marinobacter sp. P4B1           | 651    |
| A0A137SDJ8 | Type II secretion outermembrane pore forming protein                                              | J122_1598             | Marinobacter excellens LAMA 842 | 651    |
| A0A139DCG6 | General secretion pathway protein D, GspD                                                         | AWU57_4424            | Marinobacter sp. T13-3          | 629    |
| A0A139DNL3 | General secretion pathway protein D                                                               | AWU57_547             | Marinobacter sp. T13-3          | 647    |
| A0A165RQY1 | Type II secretion system protein GspD                                                             | A3737_06805           | Oleiphilus sp. HI0065           | 648    |
| A0A166I3K4 | Type II secretion system protein GspD                                                             | A3715_07385           | Oleiphilus sp. HI0009           | 656    |
| A0A166XKS3 | Type II secretion system protein GspD                                                             | A3759_05180           | Thalassolituus sp. HI0120       | 632    |
| A0A176H9J8 | Type II secretion system protein GspD                                                             | A3741_03060           | Oleiphilus sp. HI0069           | 651    |
| A0A176HKY4 | Type II secretion system protein GspD                                                             | A3746_12680           | Oleibacter sp. HI0075           | 631    |
| A0A1D9GI41 | Type II secretion system protein GspD                                                             | BKP64_02630           | Marinobacter salinus            | 651    |
| A0A1E3CCM3 | Type II secretion system protein GspD                                                             | A6779_07220           | Marinobacter adhaerens          | 650    |
| A0A1E7PTI9 | Type II secretion system protein GspD                                                             | BG841_00650           | Marinobacter sp. X15-166B       | 651    |
| A0A1H5YCB7 | General secretion pathway protein D                                                               | SAMN04515663_11064    | Alcanivorax sp. DSM 26293       | 684    |
| A0A1L6KGG5 | Type II secretion system protein GspD                                                             | CN03_15005            | Thalassolituus oleivorans       | 636    |

|            |                                               |                   |                                                                                 |     |
|------------|-----------------------------------------------|-------------------|---------------------------------------------------------------------------------|-----|
| A0A1M6RZC4 | General secretion pathway protein D           | SAMN05216369_1751 | Marinobacter antarcticus                                                        | 651 |
| A0A1Q8G399 | Type II secretion system protein GspD         | AWH63_09050       | Marinobacter sp. C18                                                            | 650 |
| A0A1S2CEU2 | Type II secretion system protein GspD         | BCA33_15855       | Marinobacter sp. AC-23                                                          | 651 |
| A1U289     | General secretion pathway protein D           | Maqu_2027         | Marinobacter hydrocarbonoclasticus (strain ATCC 700491 / DSM 11845 / VT8)       | 649 |
| A3J9R2     | Type II secretory pathway, component PulD     | MELB17_18269      | Marinobacter sp. ELB17                                                          | 640 |
| A4BES0     | Type II secretory pathway, component PulD     | MED297_02717      | Reinekea blandensis MED297                                                      | 653 |
| B4X5A7     | General secretion pathway protein D           | ADG881_2997       | Alcanivorax sp. DG881                                                           | 694 |
| E4PGK8     | Type II and III secretion system protein      | HP15_2355         | Marinobacter adhaerens (strain HP15)                                            | 663 |
| F2K4U3     | General secretion pathway protein D           | Marme_3370        | Marinomonas mediterranea (strain ATCC 700492 / JCM 21426 / NBRC 103028 / MMB-1) | 623 |
| LOWCH0     | General (Type II) secretion pathway protein D | A11A3_08505       | Alcanivorax hongdengensis A-11-3                                                | 689 |
| M7D5C8     | Type II and III secretion system protein      | MSNKSG1_08553     | Marinobacter santoriniensis NKSG1                                               | 653 |
| N6W366     | Type II and III secretion system protein      | J057_01084        | Marinobacter nanhaiticus D15-8W                                                 | 659 |
| Q0VSG7     | General (Type II) secretion pathway protein D | ABO_0433          | Alcanivorax borkumensis (strain ATCC 700651 / DSM 11573 / NCIMB 13689 / SK2)    | 710 |
| Q1N1M8     | Type II secretory pathway, component PulD     | RED65_03250       | Bermanella marisrubri                                                           | 640 |
| Q2SDG3     | Type II secretory pathway, component PulD     | HCH_04610         | Hahella chejuensis (strain KCTC 2396)                                           | 647 |
| R4YRD3     | General secretion pathway protein D           | gspD OLEAN_C04930 | Oleispira antarctica RB-8                                                       | 634 |
| R8B675     | Type II and III secretion system protein      | MARLIPOL_01008    | Marinobacter lipolyticus SM19                                                   | 651 |
| U7FLP8     | Secretin                                      | Q670_04785        | Alcanivorax sp. P2S70                                                           | 690 |
| W5YJW5     | General secretion pathway protein D           | AU14_12900        | Marinobacter similis                                                            | 656 |
| A0A072NF41 | General secretion pathway protein D           | D777_02049        | Marinobacter nitratireducens                                                    | 652 |
| A0A0B4XG46 | General (Type II) secretion pathway protein D | S7S_03010         | Alcanivorax pacificus W11-5                                                     | 685 |
| A0A095TML6 | General (Type II) secretion pathway protein D | Y5S_03081         | Alcanivorax nanhaiticus                                                         | 685 |

## Acinetobacter

| Entry      | Protein names                              | Gene names     | Organism                                              | Length |
|------------|--------------------------------------------|----------------|-------------------------------------------------------|--------|
| A0A009F596 | Type II secretion system protein D         | gspD J504_2311 | Acinetobacter baumannii 348935                        | 751    |
| A0A009GBQ0 | Type II secretion system protein D         | gspD J517_3813 | Acinetobacter baumannii 118362                        | 758    |
| A0A009GD25 | Type II secretion system protein D         | gspD J508_1914 | Acinetobacter sp. 1289694                             | 758    |
| A0A009HVA4 | Type II secretion system protein D         | gspD J512_0964 | Acinetobacter baumannii 1295743                       | 756    |
| A0A009JNZ9 | Type II secretion system protein D         | gspD J537_3195 | Acinetobacter baumannii 1437282                       | 756    |
| A0A010KB51 | Type II secretion system protein D         | gspD J582_0887 | Acinetobacter sp. 1566109                             | 758    |
| A0A011C7F5 | Type II secretion system protein D         | gspD J623_3605 | Acinetobacter sp. 1245249                             | 756    |
| A0A013SJK9 | Type II secretion system protein D         | gspD J663_3480 | Acinetobacter sp. 826659                              | 752    |
| A0A031LIM3 | General secretion pathway protein GspD     | CL42_15495     | Acinetobacter sp. Ver3                                | 795    |
| A0A062BR64 | Type II secretion system protein D         | gspD J577_3095 | Acinetobacter sp. 263903-1                            | 751    |
| A0A072CTL1 | General secretion pathway protein GspD     | DT74_20445     | Acinetobacter sp. ETR1                                | 749    |
| A0A0A3W7N7 | General secretion pathway protein D        | GW12_09140     | Acinetobacter sp. HR7                                 | 746    |
| A0A0A8TJK7 | General secretion pathway protein D        |                | Acinetobacter bereziniae (Acinetobacter genomosp. 10) | 749    |
| A0A0A8XK32 | Putative general secretion pathway protein | P23_3555       | Acinetobacter calcoaceticus                           | 758    |
| A0A0B2UBD4 | General secretion pathway protein GspD     | DH17_06755     | Acinetobacter oleivorans                              | 758    |
| A0A0B2XSR9 | General secretion pathway protein GspD     | NT90_14420     | Acinetobacter baumannii                               | 758    |
| A0A0F3LGI2 | General secretion pathway protein GspD     | VH96_12500     | Acinetobacter indicus                                 | 749    |
| A0A0J8SQJ0 | General secretion pathway protein GspD     | ACS72_11860    | Acinetobacter sp. VT 511                              | 750    |
| A0A0L0J0M1 | Type II and III secretion system protein   | AFK20_10895    | Enhydrobacter aerosaccus                              | 813    |
| A0A0M117U3 | General secretion pathway protein GspD     | ABW55_03670    | Acinetobacter sp. C15                                 | 767    |
| A0A0M4HB54 | General secretion pathway protein GspD     | AMQ28_09350    | Acinetobacter sp. TTH0-4                              | 755    |
| A0A0M4T352 | Type II secretion system protein GspD      | AOC03_08965    | Psychrobacter urativorans                             | 740    |
| A0A0Q9ZGL8 | Type II and III secretion system protein   | AK822_11260    | Psychrobacter sp. P11F6                               | 748    |
| A0A0U3SU07 | General secretion pathway protein GspD     | RZ95_15645     | Acinetobacter johnsonii XBB1                          | 786    |
| A0A0W8H430 | General secretion pathway protein GspD     | AAU60_01405    | Acinetobacter johnsonii                               | 786    |
| A0A109WC14 | Type II secretion system protein GspD      | AXE82_09055    | Moraxella osloensis                                   | 808    |
| A0A124EZJ1 | Type II secretion system protein GspD      | NDM229_18605   | Acinetobacter bereziniae (Acinetobacter genomosp. 10) | 749    |
| A0A127H310 | Type II and III secretion system protein   | AK825_11215    | Psychrobacter sp. P11G5                               | 754    |
| A0A137Y674 | Type II secretion system protein GspD      | AYL20_15270    | Acinetobacter haemolyticus                            | 754    |
| A0A144PYB8 | General secretion pathway protein D        | A3K91_2177     | Psychrobacter alimentarius                            | 751    |
| A0A145WN30 | Type II secretion system protein GspD      | AMD27_01160    | Acinetobacter sp. TGL-Y2                              | 758    |

|            |                                                                                                   |                      |                                  |     |
|------------|---------------------------------------------------------------------------------------------------|----------------------|----------------------------------|-----|
| A0A151Y5P3 | Type II secretion system protein GspD                                                             | AZH43_05890          | Acinetobacter sp. ANC 4149       | 747 |
| A0A172YL17 | Type II secretion system protein GspD                                                             | A3K93_00755          | Acinetobacter sp. NCu2D-2        | 744 |
| A0A173MTY7 | General secretion pathway protein D                                                               | MOSL_0425            | Moraxella osloensis              | 807 |
| A0A178G045 | Type II secretion system protein GspD                                                             | AY606_11760          | Acinetobacter sp. SFB            | 756 |
| A0A178G071 | Type II secretion system protein GspD                                                             | AY608_06645          | Acinetobacter sp. SFC            | 757 |
| A0A178GQP4 | Type II secretion system protein GspD                                                             | AY605_03025          | Acinetobacter sp. SFD            | 754 |
| A0A197F9D9 | Type II secretion system protein GspD                                                             | A7325_10965          | Psychrobacter sp. SHUES1         | 754 |
| A0A1B2M327 | Type II secretion system protein GspD                                                             | BFG52_15105          | Acinetobacter larvae             | 739 |
| A0A1B8PYH9 | Type II secretion system protein GspD                                                             | A9299_11860          | Moraxella osloensis              | 818 |
| A0A1B8U870 | General secretion pathway protein GspD                                                            | NG55_19945           | Acinetobacter gyllenbergii       | 758 |
| A0A1D9CYK6 | Bacterial type II and III secretion system family protein                                         | AOT82_1233           | Psychrobacter sp. AntiMn-1       | 752 |
| A0A1E3GII5 | Type II secretion system protein GspD                                                             | A9Z54_12915          | Acinetobacter sp. 51m            | 754 |
| A0A1E5KLD1 | Type II secretion system protein GspD                                                             | BAX61_10215          | Psychrobacter sp. B29-1          | 748 |
| A0A1E7RB90 | Type II secretion system protein GspD                                                             | BJD20_00580          | Acinetobacter proteolyticus      | 758 |
| A0A1E8DZ41 | Type II secretion system protein GspD                                                             | BJN41_13070          | Acinetobacter towneri            | 752 |
| A0A1F2VAH4 | Type II secretion system protein GspD                                                             | A2003_00780          | Acinetobacter sp. GWC1_38_13     | 751 |
| A0A1L6KR38 | Type II secretion system protein GspD                                                             | AHTJS_15140          | Acinetobacter haemolyticus       | 736 |
| A0A1Q3NB59 | Type II secretion system protein GspD                                                             | BGO19_00465          | Acinetobacter sp. 38-8           | 753 |
| A0A1Q8DWA1 | Type II secretion system protein GspD                                                             | BTV98_01285          | Psychrobacter sp. Cmf 22.2       | 752 |
| A0A1Q8E487 | Type II secretion system protein GspD                                                             | BTV99_01165          | Psychrobacter sp. Rd 27.2        | 747 |
| A0A1R4IBD0 | General secretion pathway protein D / Type II secretion outermembrane pore forming protein (PulD) | CZ794_01350          | Psychrobacter sp. JB385          | 748 |
| A0A1S8CTY8 | Type II secretion system protein GspD                                                             | BKE30_12185          | Alkanindiges sp. H1              | 761 |
| A0A1T0CCW3 | Type II secretion system protein GspD                                                             | B0682_07150          | Moraxella lincolni               | 746 |
| A0A1T1GVZ5 | Type II secretion system protein GspD                                                             | B1202_10010          | Acinetobacter sp. ANC 4945       | 743 |
| A0A1U6GPI7 | Type II and III secretion system protein                                                          | DABAL43B_2250        | Psychrobacter sp. DAB_AL43B      | 751 |
| C0VHI7     | General secretion pathway protein D                                                               | gspD HMPREF0023_0606 | Acinetobacter sp. ATCC 27244     | 735 |
| K8ZS27     | Type II secretion system protein D                                                                | gspD ACINWC141_0299  | Acinetobacter sp. WC-141         | 756 |
| K9BX38     | Type II secretion system protein D                                                                | gspD ACINWC323_0294  | Acinetobacter sp. WC-323         | 754 |
| L2F973     | Type II and III secretion system protein                                                          | MOMA_02935           | Moraxella macacae 0408225        | 764 |
| N8P3G5     | Type II secretion system protein D                                                                | F994_00419           | Acinetobacter bohemicus ANC 3994 | 755 |
| N8Q2H0     | Type II secretion system protein D                                                                | F989_02147           | Acinetobacter parvus NIPH 1103   | 752 |
| N8R937     | Type II secretion system protein D                                                                | F991_00267           | Acinetobacter sp. CIP-A165       | 737 |



|        |                                            |            |                                                         |     |
|--------|--------------------------------------------|------------|---------------------------------------------------------|-----|
| N8RTW3 | Type II secretion system protein D         | F988_00345 | Acinetobacter parvus DSM 16617 = CIP 108168             | 752 |
| N8UTJ1 | Type II secretion system protein D         | F971_03633 | Acinetobacter sp. NIPH 758                              | 752 |
| N8VNZ7 | Type II secretion system protein D         | F968_03542 | Acinetobacter sp. NIPH 817                              | 752 |
| N8W0J0 | Type II secretion system protein D         | F972_00129 | Acinetobacter sp. CIP 102529                            | 750 |
| N8Y6H9 | Type II secretion system protein D         | F960_03766 | Acinetobacter gerneri DSM 14967 = CIP 107464            | 771 |
| N9C4T4 | Type II secretion system protein D         | F942_00684 | Acinetobacter ursingii ANC 3649                         | 758 |
| N9CJK4 | Type II secretion system protein D         | F947_02367 | Acinetobacter towneri DSM 14962 = CIP 107472            | 751 |
| N9DNT4 | Type II secretion system protein D         | F941_00259 | Acinetobacter bouvetii DSM 14964 = CIP 107468           | 746 |
| N9E3P1 | Type II secretion system protein D         | F938_04452 | Acinetobacter bereziniae LMG 1003 = CIP 70.12           | 748 |
| N9E7E6 | Type II secretion system protein D         | F933_02116 | Acinetobacter beijerinckii CIP 110307                   | 749 |
| N9EE27 | Type II secretion system protein D         | F934_00094 | Acinetobacter beijerinckii ANC 3835                     | 754 |
| N9FSH9 | Type II secretion system protein D         | F925_00960 | Acinetobacter lwoffii NCTC 5866 = CIP 64.10 = NIPH 512  | 750 |
| N9N781 | Type II secretion system protein D         | F895_01307 | Acinetobacter sp. CIP 64.2                              | 753 |
| N9QF07 | Type II secretion system protein D         | F887_00325 | Acinetobacter sp. NIPH 2100                             | 753 |
| N9TF44 | Type II secretion system protein D         | F902_00391 | Acinetobacter sp. CIP 70.18                             | 751 |
| Q1Q9C2 | Type II and III secretion system protein   | Pcryo_1954 | Psychrobacter cryohalolentis (strain K5)                | 750 |
| Q6FFA1 | Putative general secretion pathway protein | ACIAD0294  | Acinetobacter baylyi (strain ATCC 33305 / BD413 / ADP1) | 772 |
| R8Y3E9 | Type II secretion system protein D         | F935_02812 | Acinetobacter calcoaceticus ANC 3811                    | 758 |
| R9AW94 | Type II secretion system protein D         | I593_03456 | Acinetobacter tandoii DSM 14970 = CIP 107469            | 751 |
| S3MTL6 | Type II secretion system protein D         | F945_03610 | Acinetobacter rudis CIP 110305                          | 764 |
| U4TE52 | General secretion pathway protein D        | M917_0363  | Psychrobacter aquaticus CMS 56                          | 749 |
| V2V0T8 | Type II secretion system protein D         | F990_01501 | Acinetobacter tjernbergiae DSM 14971 = CIP 107465       | 751 |
|        |                                            |            |                                                         |     |

## Enterobacteriaceae (Klebsiella-type, Vibrio-type: GspD/PuID)

| Entry      | Protein names                                                                                                                     | Gene names         | Organism                                                                             | Length |
|------------|-----------------------------------------------------------------------------------------------------------------------------------|--------------------|--------------------------------------------------------------------------------------|--------|
| P45758     | Putative type II secretion system protein D                                                                                       | gspD               | Escherichia coli (strain K12)                                                        | 650    |
| B7UI37     | Putative type II secretion protein                                                                                                | gspD               | Escherichia coli O127:H6 (strain E2348/69 / EPEC)                                    | 686    |
| W1GSM0     | General secretion pathway protein D                                                                                               |                    | Klebsiella pneumoniae ISC21                                                          | 444    |
| P45779     | Type II secretion system protein D (T2SS protein D) (Cholera toxin secretion protein EpsD) (General secretion pathway protein D)  | epsD VC_2733       | Vibrio cholerae serotype O1 (strain ATCC 39315 / El Tor Inaba N16961)                | 674    |
| A0A090QX80 | General secretion pathway protein D                                                                                               | JCM19237_7007      | Photobacterium aphoticum                                                             | 474    |
| P15644     | Type II secretion system protein D (T2SS protein D) (General secretion pathway protein D) (Pullulanase secretion envelope PuID)   | pulD               | Klebsiella pneumoniae                                                                | 660    |
| P31700     | Type II secretion system protein D (T2SS protein D) (General secretion pathway protein D) (Pectic enzymes secretion protein OutD) | outD               | Dickeya chrysanthemi (Pectobacterium chrysanthemi) (Erwinia chrysanthemi)            | 712    |
| P31701     | Type II secretion system protein D (T2SS protein D) (General secretion pathway protein D) (Pectic enzymes secretion protein OutD) | outD               | Pectobacterium carotovorum subsp. carotovorum (Erwinia carotovora subsp. carotovora) | 650    |
| P31780     | Type II secretion system protein D (T2SS protein D) (General secretion pathway protein D)                                         | exeD               | Aeromonas hydrophila                                                                 | 678    |
| P45778     | Type II secretion system protein D (T2SS protein D) (General secretion pathway protein D)                                         | exeD               | Aeromonas salmonicida                                                                | 678    |
| Q01565     | Type II secretion system protein D (T2SS protein D) (General secretion pathway protein D) (Pectic enzymes secretion protein OutD) | outD Dda3937_02415 | Dickeya dadantii (strain 3937) (Erwinia chrysanthemi (strain 3937))                  | 710    |
| A0A010QAY7 | Type II secretion system protein D                                                                                                | H978DRAFT_3598     | Alteromonas sp. ALT199                                                               | 681    |
| A0A017I8C3 | Type II secretion system protein D                                                                                                | AC26_3562          | Escherichia coli 1-176-05_S3_C2                                                      | 650    |
| A0A023RES7 | General secretion pathway protein D                                                                                               | B224_0272          | Aeromonas media WS                                                                   | 682    |
| A0A023V4E9 | General secretion pathway protein GspD                                                                                            | CFNIH1_04300       | Citrobacter freundii CFNIH1                                                          | 664    |
| A0A023ZPP9 | General secretion pathway protein D                                                                                               | gspD               | Lonsdalea quercina subsp. populi                                                     | 705    |
| A0A026VBM5 | General secretion pathway protein GspD                                                                                            | BW70_07780         | Escherichia coli O174:H8 str. 04-3038                                                | 686    |
| A0A034THX2 | General secretion pathway protein D                                                                                               | JCM18904_2927      | Vibrio sp. JCM 18904                                                                 | 673    |
| A0A060VGT4 | PuID protein                                                                                                                      | pulD KpST82_0729   | Klebsiella pneumoniae                                                                | 660    |
| A0A061Q0X5 | General secretion pathway protein D                                                                                               | JCM19052_3484      | Vibrio sp. JCM 19052                                                                 | 681    |
| A0A066PBW0 | Type II secretion system protein D                                                                                                | AF34_01374         | Lelliottia amnigena CHS 78                                                           | 640    |
| A0A066RWY6 | General secretion pathway protein GspD                                                                                            | EA58_08005         | Photobacterium galathea                                                              | 671    |
| A0A071LUJ7 | General secretion pathway protein GspD                                                                                            | DT73_15915         | Mangrovibacter sp. MFB070                                                            | 656    |

|            |                                                                                      |                                                                 |                                                                                      |     |
|------------|--------------------------------------------------------------------------------------|-----------------------------------------------------------------|--------------------------------------------------------------------------------------|-----|
| A0A073KNZ6 | General secretion protein D                                                          | SXM_0179                                                        | Shewanella xiamenensis                                                               | 704 |
| A0A078LJ98 | T2SS protein D                                                                       | gspD BN1086_02066                                               | Citrobacter koseri (Citrobacter diversus)                                            | 640 |
| A0A081LNK5 | General secretion pathway protein GspD                                               | AL345_18395                                                     | Aeromonas caviae (Aeromonas punctata)                                                | 684 |
| A0A084A0U4 | Type II secretion system protein D                                                   | pulD SRDD_21190                                                 | Serratia sp. DD3                                                                     | 660 |
| A0A085A4L6 | General secretion pathway protein D                                                  | gspD GTGU_03029                                                 | Trabulsiella guamensis ATCC 49490                                                    | 657 |
| A0A085TJH1 | Type II secretion system protein D                                                   | gspD DN31_2176                                                  | Vibrio cholerae                                                                      | 675 |
| A0A085U413 | General secretion pathway protein D                                                  | nADLYRO1b_2696                                                  | Yersinia ruckeri                                                                     | 660 |
| A0A085UB85 | General secretion pathway protein D                                                  | CSF007_14575<br>nADLYRO1b_218                                   | Yersinia ruckeri                                                                     | 674 |
| A0A087KL83 | General secretion pathway protein GspD                                               | IV04_24035                                                      | Serratia sp. Ag1                                                                     | 655 |
| A0A090K3H2 | General secretion pathway protein D                                                  | epsD MVIS_0264                                                  | Moritella viscosa                                                                    | 697 |
| A0A091A379 | General secretion pathway protein GspD                                               | JM66_17390                                                      | Aeromonas salmonicida                                                                | 678 |
| A0A093SMQ1 | General secretion pathway protein GspD                                               | KP17_09835                                                      | Pectobacterium carotovorum subsp. carotovorum (Erwinia carotovora subsp. carotovora) | 684 |
| A0A093T2A1 | General secretion pathway protein GspD                                               | KP22_12470                                                      | Pectobacterium betavasculorum                                                        | 684 |
| A0A094J9L9 | General secretion pathway protein GspD                                               | HR45_15080                                                      | Shewanella mangrovi                                                                  | 708 |
| A0A094TTR7 | General secretion pathway protein GspD                                               | KU75_21515                                                      | Pectobacterium carotovorum subsp. odoriferum                                         | 684 |
| A0A099L6T6 | Uncharacterized protein                                                              | ND16A_0920                                                      | Thalassotalea sp. ND16A                                                              | 708 |
| A0A0A0HC84 | General secretion pathway protein D (Putative general secretion pathway protein D)   | EL75_0371 EL79_0390<br>EL80_0382                                | Escherichia coli                                                                     | 654 |
| A0A0A3FEG1 | Type II secretion system protein GspD                                                | BWP24_15985                                                     | Vibrio campbellii                                                                    | 675 |
| A0A0A3Z9X2 | General secretion pathway protein GspD                                               | NG99_09635                                                      | Erwinia typographi                                                                   | 625 |
| A0A0A8FJA4 | General secretion pathway protein D                                                  | W909_13875                                                      | Dickeya zeae EC1                                                                     | 713 |
| A0A0B2TE34 | General secretion pathway protein GspD                                               | OI69_03120                                                      | Pectobacterium carotovorum (Erwinia carotovora)                                      | 651 |
| A0A0B3WXM1 | General secretion pathway protein GspD                                               | RC79_07615                                                      | Pectobacterium carotovorum subsp. brasiliense                                        | 684 |
| A0A0B5J335 | General secretion pathway protein GspD                                               | TE10_06540                                                      | Raoultella ornithinolytica (Klebsiella ornithinolytica)                              | 646 |
| A0A0B6FA65 | Type II secretion system protein D                                                   | gspD AW19_2330                                                  | Yersinia frederiksenii Y225                                                          | 657 |
| A0A0B7GFX3 | General secretory pathway component, cryptic (Type II secretion system protein GspD) | gspD BBD63_04435<br>BBD64_04435<br>BBD65_04430<br>KVR801_380056 | Klebsiella variicola                                                                 | 651 |
| A0A0C3R4L0 | General secretion pathway protein GspD                                               | DB48_02875                                                      | Shewanella sp. cp20                                                                  | 704 |
| A0A0D0HV79 | General secretion pathway protein GspD                                               | SN10_01905                                                      | Vibrio harveyi (Beneckea harveyi)                                                    | 675 |
| A0A0D0QPG7 | Contig_52, whole genome shotgun sequence                                             | RW26_15455                                                      | Aeromonas sp. L_1B5_3                                                                | 682 |
| A0A0D1DNM8 | Whole genome shotgun sequence                                                        | H323_05590                                                      | Vibrio parahaemolyticus VP766                                                        | 674 |
| A0A0D1FP35 | Whole genome shotgun sequence                                                        | H320_07875                                                      | Vibrio parahaemolyticus 49                                                           | 675 |

|            |                                                                                                                      |                                                                         |                                              |     |
|------------|----------------------------------------------------------------------------------------------------------------------|-------------------------------------------------------------------------|----------------------------------------------|-----|
| A0A0D8CSU2 | General secretion pathway protein GspD                                                                               | SG35_20260                                                              | Thalassomonas actiniarum                     | 694 |
| A0A0D8D699 | General secretion pathway protein GspD                                                                               | SG34_24010                                                              | Thalassomonas viridans                       | 694 |
| A0A0E0WW85 | General secretion pathway protein D                                                                                  | A225_1532                                                               | Klebsiella michiganensis E718                | 659 |
| A0A0E1NTF5 | General secretion pathway protein D (Type II secretion system protein D)                                             | gspD YPA_0453<br>CH58_3299                                              | Yersinia pestis bv. Antiqua (strain Antiqua) | 640 |
| A0A0E2LL48 | General secretion pathway protein D                                                                                  | M001_04490                                                              | Aeromonas veronii Hm21                       | 679 |
| A0A0E8XH01 | General secretion pathway protein D                                                                                  | pulD_2 ERS008478_01498                                                  | Yersinia wautersii                           | 640 |
| A0A0F0SVA4 | General secretion pathway protein GspD                                                                               | SS44_22750                                                              | Enterobacter cloacae subsp. cloacae          | 642 |
| A0A0F0YGF6 | General secretion pathway protein D (General secretion pathway protein GspD) (Type II secretion system protein GspD) | gspD AN674_0202860<br>AN693_0201415<br>SAMEA3181516_01548<br>SS33_04580 | Enterobacter kobei                           | 643 |
| A0A0F1BG95 | General secretion pathway protein GspD                                                                               | SS37_01745                                                              | Enterobacter cloacae complex sp. 35699       | 642 |
| A0A0F1WYQ9 | Type II secretion system protein GspD                                                                                | ASV07_04910                                                             | Enterobacter cloacae complex sp. SMART_763   | 640 |
| A0A0F3ZPH9 | General secretion pathway protein GspD                                                                               | SG66_03415                                                              | Enterobacter asburiae                        | 641 |
| A0A0F4BML7 | General secretion pathway protein GspD                                                                               | SG71_13125                                                              | Enterobacter cloacae complex sp. CIDEIMsCOL9 | 643 |
| A0A0F5SJP8 | General secretion pathway protein GspD                                                                               | WG82_02330                                                              | Citrobacter amalonaticus                     | 661 |
| A0A0F5V9F4 | General secretion pathway protein GspD                                                                               | KY46_17300                                                              | Photobacterium halotolerans                  | 672 |
| A0A0F5ZW34 | General secretion pathway protein GspD                                                                               | RN22_13605                                                              | Grimontia sp. AD028                          | 672 |
| A0A0F6TU89 | General secretion pathway protein GspD                                                                               | F384_04065                                                              | Citrobacter amalonaticus Y19                 | 640 |
| A0A0G4K093 | General secretion pathway protein D                                                                                  | BN1221_03895                                                            | Brenneria goodwinii                          | 657 |
| A0A0H0GIB9 | General secretion pathway protein GspD                                                                               | WR15_04770                                                              | Escherichia coli                             | 645 |
| A0A0H3F5A6 | General secretion pathway protein D                                                                                  | Rahaq_0337                                                              | Rahnella sp. (strain Y9602)                  | 659 |
| A0A0H3I117 | General secretion pathway protein D                                                                                  | W5S_1295                                                                | Pectobacterium sp. (strain SCC3193)          | 695 |
| A0A0H5GE01 | General secretion pathway protein D                                                                                  | outD ERS137941_02317                                                    | Yersinia enterocolitica                      | 648 |
| A0A0J1GNR5 | General secretion pathway protein GspD                                                                               | ABT58_07950                                                             | Photobacterium aphoticum                     | 671 |
| A0A0J1H2W0 | General secretion pathway protein GspD                                                                               | ABT57_20390                                                             | Photobacterium ganghwense                    | 671 |
| A0A0J1H7W1 | General secretion pathway protein GspD                                                                               | ABT56_04125                                                             | Photobacterium aquae                         | 672 |
| A0A0J1VEC7 | Type II secretion system protein D                                                                                   | SP99_04103                                                              | Enterobacter sp. BIDMC92                     | 661 |
| A0A0J6QGX9 | General secretion pathway protein GspD                                                                               | VK95_02170                                                              | Leclercia sp. LK8                            | 640 |
| A0A0J8GPG7 | General secretion pathway protein GspD                                                                               | XM47_13265                                                              | Catenovulum maritimum                        | 721 |
| A0A0J8V8D4 | General secretion pathway protein GspD                                                                               | AB733_18045                                                             | Photobacterium swingsii                      | 671 |
| A0A0J8VHT9 | General secretion pathway protein GspD                                                                               | ACH50_17395                                                             | Franconibacter sp. DJ34                      | 659 |
| A0A0K4TJQ6 | Type II secretion protein EtpD                                                                                       | pulD_2 pulD<br>ERS085383_04345                                          | Escherichia coli                             | 656 |

|            |                                        |                                                     |                             |     |
|------------|----------------------------------------|-----------------------------------------------------|-----------------------------|-----|
|            |                                        | ERS085404_04863<br>ERS085416_03928                  |                             |     |
| A0A0L0ATR0 | General secretion pathway protein GspD | AC791_06350                                         | Klebsiella sp. RIT-PI-d     | 665 |
| A0A0M0IPF9 | General secretion pathway protein GspD | AKJ18_04385                                         | Vibrio xuii                 | 675 |
| A0A0M3EZN9 | General secretion pathway protein GspD | OA46_19395                                          | Enterobacter cloacae        | 643 |
| A0A0M9C7P8 | General secretion pathway protein GspD | ACX03_14295                                         | Vibrio parahaemolyticus     | 674 |
| A0A0N0ZIF0 | General secretion pathway protein GspD | ADS78_06805                                         | Idiomarina abyssalis        | 696 |
| A0A0N8UIS7 | General secretion pathway protein GspD | XV92_05055                                          | Vibrio metoecus             | 674 |
| A0A0P8Y4W9 | General secretion pathway protein GspD | JI57_03220                                          | Psychromonas sp. PRT-SC03   | 660 |
| A0A0Q0IXK5 | Type II secretion system protein D     | pulD AN944_01753                                    | Shewanella sp. P1-14-1      | 715 |
| A0A0Q4N2L8 | Type II secretion system protein GspD  | ASF13_04890                                         | Erwinia sp. Leaf53          | 646 |
| A0A0T7NSN1 | General secretion pathway protein D    | outD ERS008498_01674                                | Yersinia enterocolitica     | 657 |
| A0A0T9LEY7 | General secretion pathway protein D    | outD ERS008491_02484                                | Yersinia kristensenii       | 660 |
| A0A0T9LF55 | General secretion pathway protein D    | outD ERS137967_02681                                | Yersinia nurmii             | 680 |
| A0A0T9M6P4 | General secretion pathway protein D    | pulD_2 ERS008566_01872                              | Yersinia pseudotuberculosis | 640 |
| A0A0T9M9I9 | General secretion pathway protein D    | outD ERS008530_02210                                | Yersinia intermedia         | 658 |
| A0A0T9P0L6 | General secretion pathway protein D    | pulD ERS008670_00633                                | Yersinia massiliensis       | 654 |
| A0A0T9P9F4 | General secretion pathway protein D    | outD ERS008529_01454                                | Yersinia pekkanenii         | 661 |
| A0A0T9PFC4 | General secretion pathway protein D    | outD ERS008472_01886                                | Yersinia kristensenii       | 657 |
| A0A0T9QVX4 | General secretion pathway protein D    | outD ERS008531_03149                                | Yersinia frederiksenii      | 658 |
| A0A0T9SFD6 | General secretion pathway protein D    | outD ERS137951_02170                                | Yersinia enterocolitica     | 648 |
| A0A0T9SWN1 | General secretion pathway protein D    | pulD ERS137951_04103                                | Yersinia enterocolitica     | 658 |
| A0A0T9SZ71 | General secretion pathway protein D    | pulD ERS008727_01455                                | Yersinia enterocolitica     | 653 |
| A0A0T9TJI1 | General secretion pathway protein D    | outD ERS008545_03010                                | Yersinia frederiksenii      | 651 |
| A0A0T9TT10 | General secretion pathway protein D    | outD ERS137965_01753                                | Yersinia aldovae            | 641 |
| A0A0T9TY23 | General secretion pathway protein D    | outD ERS008460_01815                                | Yersinia kristensenii       | 666 |
| A0A0T9UWL5 | General secretion pathway protein D    | pulD ERS137965_03928                                | Yersinia aldovae            | 657 |
| A0A0T9UYN2 | General secretion pathway protein D    | outD ERS008521_03909                                | Yersinia frederiksenii      | 658 |
| A0A0T9UZU0 | General secretion pathway protein D    | outD ERS008547_03839                                | Yersinia intermedia         | 661 |
| A0A0U1HAI9 | General secretion pathway protein D    | outD_1 outD_2<br>ERS008580_01032<br>ERS008580_01048 | Yersinia enterocolitica     | 648 |
| A0A0U1HWS0 | General secretion pathway protein D    | outD ERS008555_03458                                | Yersinia rohdei             | 654 |
| A0A0U5VA85 | Pullulanase secretion envelope pulD    | pulD ERS381490_01824                                | Serratia marcescens         | 655 |
| A0A0V9E2F2 | Type II secretion system protein GspD  | APT89_14685                                         | Enterobacter sp. 50588862   | 644 |

|            |                                        |                              |                                              |     |
|------------|----------------------------------------|------------------------------|----------------------------------------------|-----|
| A0A0V9JQ40 | Type II secretion system protein GspD  | APU02_09015                  | Citrobacter sp. 50677481                     | 642 |
| A0A0W0AMI2 | General secretion pathway protein GspD | VO68_11640 VO70_10735        | Aeromonas salmonicida                        | 678 |
| A0A0W0AW81 | General secretion pathway protein GspD | VO69_18440                   | Aeromonas salmonicida                        | 678 |
| A0A0W7U1E1 | Type II secretion system protein GspD  | ATO46_17505                  | Aeromonas schubertii                         | 679 |
| A0A0X4ETS4 | Type II secretion system protein GspD  | AWI28_12400                  | Enterobacter cloacae complex sp. GN04363     | 642 |
| A0A0X6Z4I0 | Type II secretion system protein GspD  | ABF69_0219500                | Enterobacter cloacae complex sp. GN02468     | 643 |
| A0A126PRE0 | Type II secretion system protein GspD  | AW879_16350                  | Enterobacter cloacae                         | 640 |
| A0A135IAT9 | Type II secretion system protein GspD  | ATN88_21065                  | Enterovibrio corali                          | 654 |
| A0A137SBB9 | General secretion pathway protein D    | AKG98_1032                   | Moritella sp. JT01                           | 697 |
| A0A145L6I9 | General secretion pathway protein D    | pulD<br>SAMEA2273332_04757   | Enterobacter cloacae                         | 661 |
| A0A152V1A7 | Type II secretion system protein GspD  | ARC77_28485<br>AU473_28895   | Escherichia coli                             | 655 |
| A0A156SPW1 | General secretion pathway protein D    | gspD<br>SAMEA2273318_02754   | Enterobacter cloacae                         | 641 |
| A0A159YYQ5 | General secretion pathway protein GspD | NF29_20295                   | Enterobacter cloacae                         | 641 |
| A0A162UIG8 | Type II secretion system protein GspD  | A3466_14900                  | Enterobacter cloacae complex sp. GN06232     | 639 |
| A0A170AUN8 | General secretion pathway protein D    | pulD<br>SAMEA2273575_01987   | Klebsiella oxytoca                           | 660 |
| A0A175VJT6 | Type II secretion system protein GspD  | LCR_11910                    | Aeromonas enteropelogenes (Aeromonas trota)  | 677 |
| A0A178KQP7 | Type II secretion system protein GspD  | A3K86_00825                  | Photobacterium jeanii                        | 672 |
| A0A181XRE7 | General secretion pathway protein D    | pulD_2<br>SAMEA2273573_03578 | Klebsiella oxytoca                           | 660 |
| A0A191W0U5 | Type II secretion system protein GspD  | PL14_00815                   | Vibrio anguillarum (Listonella anguillarum)  | 676 |
| A0A198GMN0 | General secretion pathway protein D    | M987_02540                   | Enterobacter soli ATCC BAA-2102              | 643 |
| A0A1A5WP53 | Type II secretion system protein GspD  | A9196_04725                  | Aeromonas dhakensis                          | 677 |
| A0A1A9FAN0 | Type II secretion system protein GspD  | A8A57_07400                  | Lelliottia amnigena (Enterobacter amnigenus) | 641 |
| A0A1B1KM35 | Type II secretion system protein D     | pulD Q5A_005120              | Serratia plymuthica PRI-2C                   | 655 |
| A0A1B7HT13 | General secretion pathway protein D    | M979_1546                    | Buttiauxella noackiae ATCC 51607             | 653 |
| A0A1B7IQB9 | General secretion pathway protein D    | M975_1820                    | Buttiauxella brennerae ATCC 51605            | 653 |
| A0A1B8YY38 | Type II secretion system protein GspD  | A9R12_19395                  | Aeromonas hydrophila                         | 677 |
| A0A1C2C679 | Type II secretion system protein GspD  | A9165_03025                  | Alishewanella sp. HH-ZS                      | 697 |
| A0A1C7PT17 | Type II secretion system protein GspD  | A9R10_06530                  | Aeromonas piscicola                          | 679 |
| A0A1D3CB07 | Type II secretion system protein GspD  | AN659_0205835                | Enterobacter sp. ST121:950178628             | 640 |
| A0A1E3E5Q8 | Type II secretion system protein GspD  | BC455_04075                  | Vibrio harveyi (Beneckea harveyi)            | 678 |
| A0A1E3MD81 | Type II secretion system protein GspD  | BGK46_15510                  | Salinivibrio sp. DV                          | 659 |

|            |                                                    |                     |                                                               |     |
|------------|----------------------------------------------------|---------------------|---------------------------------------------------------------|-----|
| A0A1E4VT81 | Type II secretion system protein GspD              | A9G06_00685         | Aeromonas sp. DNP9                                            | 679 |
| A0A1E5CDI3 | Type II secretion system protein GspD              | A1OK_06490          | Enterovibrio norvegicus FF-454                                | 671 |
| A0A1E5DB26 | Type II secretion system protein GspD              | A130_10015          | Vibrio genomosp. F6 str. FF-238                               | 676 |
| A0A1E5E5Y9 | Type II secretion system protein GspD              | A1QC_04125          | Vibrio rumoiensis 1S-45                                       | 674 |
| A0A1E5FLW5 | Type II secretion system protein GspD              | A1QY_00125          | Vibrio ordalii 12B09                                          | 677 |
| A0A1H3ZU22 | General secretion pathway protein D                | SAMN02982996_01316  | Lonsdalea quercina                                            | 705 |
| A0A1I5RZW2 | General secretion pathway protein D                | SAMN03084138_02714  | Enterovibrio norvegicus DSM 15893                             | 672 |
| A0A1J5N2Y8 | Type II secretion system protein GspD              | BM565_05300         | Gammaproteobacteria bacterium MedPE                           | 700 |
| A0A1N6HWR2 | Type II secretion system protein D (GspD)          | SAMN05444724_2354   | Salinivibrio sp. ES.052                                       | 672 |
| A0A1N7BUZ4 | Type II secretion system protein D (GspD)          | SAMN05892873_15212  | Aeromonas veronii                                             | 680 |
| A0A1N7DW06 | Type II secretion system protein D (GspD)          | SAMN05444841_11046  | Enterobacter kobei                                            | 666 |
| A0A1N7VZ79 | Type II secretion system protein D                 | AF54_01529          | Serratia marcescens BIDMC 81                                  | 654 |
| A0A1Q5VFN8 | Type II secretion system protein GspD              | BJP24_14820         | Aeromonas allosaccharophila                                   | 678 |
| A0A1Q6CMK1 | Type II secretion system protein GspD              | BI291_08460         | Thalassotalea sp. PP2-459                                     | 680 |
| A0A1Q8F171 | Type II secretion system protein GspD              | BTN33_18115         | Aeromonas veronii                                             | 633 |
| A0A1Q9H0E5 | Type II secretion system protein GspD              | BIT28_05835         | Photobacterium sp. 13-12                                      | 669 |
| A0A1Q9HAA4 | Type II secretion system protein GspD              | BIY22_12515         | Vibrio panuliri                                               | 672 |
| A0A1R4B794 | Type II secretion system protein D                 | pulD VPAL9027_02790 | Vibrio sp. CECT 9027                                          | 673 |
| A0A1S2AKA2 | Type II secretion system protein GspD              | BEH76_14665         | Shewanella algae                                              | 707 |
| A0A1S2CRF4 | Type II secretion system protein GspD              | BJD16_04200         | Aeromonas sobria                                              | 674 |
| A0A1S8CER9 | Type II secretion system protein GspD              | BMI79_20245         | Rahnella sp. J11-6                                            | 657 |
| A0A1T4UAM9 | General secretion pathway protein D                | SAMN02745132_01169  | Enterovibrio nigricans DSM 22720                              | 672 |
| A0A1U6Y4M2 | General secretion pathway protein GspD             | V469_20260          | Aeromonas hydrophila J-1                                      | 678 |
| A1SR56     | General secretion pathway protein D                | Ping_0097           | Psychromonas ingrahamii (strain 37)                           | 662 |
| A6FGZ5     | Putative type II secretory pathway, component EpsD | PE36_23882          | Moritella sp. PE36                                            | 699 |
| A7MZB6     | Uncharacterized protein                            | VIBHAR_00601        | Vibrio campbellii (strain ATCC BAA-1116 / BB120)              | 658 |
| A8GJQ5     | General secretion pathway protein D                | Spro_4251           | Serratia proteamaculans (strain 568)                          | 660 |
| A8T6E5     | General secretion pathway protein D                | AND4_17629          | Vibrio sp. AND4                                               | 675 |
| B2VI08     | General secretion pathway protein D                | outD ETA_07920      | Erwinia tasmaniensis (strain DSM 17950 / CIP 109463 / Et1/99) | 646 |
| C4L998     | General secretion pathway protein D                | Tola_0367           | Tolumonas auensis (strain DSM 9187 / TA4)                     | 685 |
| C4S9F5     | General secretion pathway protein D                | ymoll0001_4770      | Yersinia mollaretii ATCC 43969                                | 625 |
| C4SKN3     | Type II secretion system protein D                 | gspD DJ58_4014      | Yersinia frederiksenii ATCC 33641                             | 657 |

|        |                                              |                      |                                                                                                       |     |
|--------|----------------------------------------------|----------------------|-------------------------------------------------------------------------------------------------------|-----|
| C4U164 | General secretion pathway protein D          | ykris0001_29060      | Yersinia kristensenii ATCC 33638                                                                      | 635 |
| C6C305 | General secretion pathway protein D          | Dd703_1470           | Dickeya paradisiaca (strain Ech703) (Dickeya dadantii (strain Ech703))                                | 714 |
| C6CQG9 | General secretion pathway protein D          | Dd1591_1299          | Dickeya chrysanthemi (strain Ech1591) (Dickeya zeae (strain Ech1591))                                 | 716 |
| C6DAQ5 | General secretion pathway protein D          | PC1_2860             | Pectobacterium carotovorum subsp. carotovorum (strain PC1)                                            | 640 |
| D2T508 | Type II secretion system protein outD        | outD EPYR_00811      | Erwinia pyrifoliae (strain DSM 12163 / CIP 106111 / Ep16/96)                                          | 645 |
| D2TMH8 | Putative T2SS protein D                      | gspD ROD_44971       | Citrobacter rodentium (strain ICC168) (Citrobacter freundii biotype 4280)                             | 662 |
| D2ZAD4 | General secretion pathway protein D          | gspD ENTCAN_05409    | Enterobacter cancerogenus ATCC 35316                                                                  | 643 |
| D4HZX1 | Type II secretion system protein outD        | outD EAMY_2866       | Erwinia amylovora (strain CFBP1430)                                                                   | 645 |
| E3G250 | General secretion pathway protein D          | Entcl_2937           | Enterobacter lignolyticus (strain SCF1)                                                               | 647 |
| F5RTL6 | General secretion pathway protein D          | gspD HMPREF9086_0971 | Enterobacter hormaechei ATCC 49162                                                                    | 640 |
| G8LGV2 | Putative general secretion pathway protein D | gspD EcWSU1_01436    | Enterobacter cloacae EcWSU1                                                                           | 676 |
| G9YZX5 | General secretion pathway protein D          | HMPREF0880_00771     | Yokenella regensburgei ATCC 43003                                                                     | 669 |
| H2IRA1 | General secretion pathway protein D          | Rahaq2_0355          | Rahnella aquatilis (strain ATCC 33071 / DSM 4594 / JCM 1683 / NBRC 105701 / NCIMB 13365 / CIP 78.65)  | 661 |
| L0MMW6 | General secretion pathway protein D          | D781_3847            | Serratia marcescens FGI94                                                                             | 635 |
| M4U3E0 | General secretion pathway protein D          | PCNPT3_00895         | Psychromonas sp. CNPT3                                                                                | 658 |
| N9VIR3 | General secretion pathway protein D          | G114_14071           | Aeromonas diversa CDC 2478-85                                                                         | 680 |
| Q6D2I6 | General secretion pathway protein D          | outD ECA3109         | Pectobacterium atrosepticum (strain SCRI 1043 / ATCC BAA-672) (Erwinia carotovora subsp. atroseptica) | 650 |
| R1GZM8 | General secretion pathway protein D          | G113_01424           | Aeromonas molluscorum 848                                                                             | 677 |
| R8WR60 | Type II secretion system protein D           | WC7_04167            | Citrobacter sp. KTE151                                                                                | 661 |
| R9PF56 | General secretion pathway protein D          | AALB_0095            | Agarivorans albus MKT 106                                                                             | 702 |
| S4YQC0 | General secretion pathway protein D          | M621_05230           | Serratia plymuthica S13                                                                               | 655 |
| T0PNY9 | General secretion pathway protein D          | K931_09985           | Aeromonas salmonicida subsp. pectinolytica 34mel                                                      | 677 |
| U0ETS3 | General secretion pathway protein D          | N779_24935           | Vibrio coralliilyticus OCN008                                                                         | 678 |
| U2M9C3 | General secretion pathway protein D          | L581_3189            | Serratia fonticola AU-AP2C                                                                            | 648 |
| U6ZCV0 | Uncharacterized protein                      | A544_2877            | Dickeya solani D s0432-1                                                                              | 726 |
| V3TNZ0 | Uncharacterized protein                      | Ser39006_03464       | Serratia sp. (strain ATCC 39006)                                                                      | 709 |
| V5ZBE3 | Type II secretion system protein outD        | outD EPIR_2906       | Erwinia piriflorinigra CFBP 5888                                                                      | 645 |
| V9ZZF9 | General secretion pathway protein D          | AH4AK4_3643          | Aeromonas hydrophila 4AK4                                                                             | 685 |
| W0LA40 | General secretion pathway protein GspD       | Z042_03970           | Chania multitudinisentens RB-25                                                                       | 655 |



|            |                                              |                   |                                                            |     |
|------------|----------------------------------------------|-------------------|------------------------------------------------------------|-----|
| A0A034TYM6 | General secretion pathway protein D          | JCM18905_3059     | Vibrio sp. JCM 18905                                       | 672 |
| A0A063KMA0 | General secretion pathway protein GspD       | DC53_15910        | Pseudoalteromonas fuliginosa                               | 687 |
| A0A066UWK3 | General secretion pathway protein GspD       | VFDL14_15210      | Vibrio fortis                                              | 674 |
| A0A075P3V8 | General secretion pathway protein GspD       | EP13_18580        | Alteromonas australica                                     | 681 |
| A0A081KGN5 | General secretion pathway protein GspD       | GV64_23640        | Endozoicomonas elysicola                                   | 746 |
| A0A084CNJ6 | General secretion pathway protein D          | epsD CF67_19010   | Candidatus Photodesmus blepharus                           | 674 |
| A0A084TH91 | General secretion pathway protein GspD       | HW45_00495        | Vibrio sp. ER1A                                            | 674 |
| A0A085PK17 | General secretion pathway protein D          |                   | Vibrio cholerae                                            | 674 |
| A0A087IFK6 | General secretion pathway protein GspD       | JS86_21435        | Vibrio vulnificus                                          | 673 |
| A0A090ITI0 | General secretion pathway protein D          | epsD AWOD_I_2557  | Aliivibrio wodanis                                         | 672 |
| A0A090S6J7 | General secretion pathway protein D          | JCM19235_7071     | Vibrio maritimus                                           | 658 |
| A0A090U2E2 | General secretion pathway protein D          | JCM19240_4565     | Vibrio maritimus                                           | 658 |
| A0A094ITI5 | General secretion pathway protein GspD       | IDAT_05625        | Idiomarina atlantica                                       | 702 |
| A0A094IUK1 | General secretion pathway protein GspD       | IDSA_00960        | Idiomarina salinarum                                       | 702 |
| A0A097QNZ1 | Type II secretion system protein GspD        | BA953_08550       | Vibrio coralliilyticus                                     | 676 |
| A0A099KNP1 | General secretion pathway protein D          | GAB14E_0511       | Colwellia psychrerythraea (Vibrio psychroerythus)          | 695 |
| A0A099KU78 | General secretion pathway protein D          | ND2E_1518         | Colwellia psychrerythraea (Vibrio psychroerythus)          | 697 |
| A0A099LC46 | General secretion pathway protein D          | ND6B_0080         | Pseudoalteromonas sp. ND6B                                 | 688 |
| A0A099LRY2 | General secretion pathway protein GspD       | EA26_01415        | Vibrio navarrensis                                         | 680 |
| A0A0A5HVK1 | General secretion pathway protein GspD       | NM06_17045        | Vibrio sinaloensis                                         | 678 |
| A0A0A5I4P5 | General secretion pathway protein GspD       | NM22_18805        | Vibrio tubiashii                                           | 675 |
| A0A0A6QKM0 | General secretion pathway protein GspD       | NM09_18205        | Vibrio caribbeanicus                                       | 677 |
| A0A0A7EEN0 | General secretion pathway protein GspD       | OM33_04470        | Pseudoalteromonas sp. OCN003                               | 688 |
| A0A0B2JQ19 | General secretion pathway protein GspD       | PL71_03555        | Pseudoalteromonas flavipulchra NCIMB 2033 = ATCC BAA-314   | 687 |
| A0A0B3XRA0 | General secretion pathway protein GspD       | RJ41_12945        | Alteromonas marina                                         | 681 |
| A0A0B7JGT0 | General secretory pathway component, cryptic | gspD PPBDW_I60022 | Photobacterium phosphoreum ANT-2200                        | 672 |
| A0A0B8QSV5 | General secretion pathway protein D          | JCM19241_1774     | Vibrio ishigakensis                                        | 677 |
| A0A0B9GYP0 | General secretion pathway protein GspD       | RJ45_20825        | Photobacterium gaetbulicola                                | 673 |
| A0A0C1QIJ8 | General secretion pathway protein GspD       | JF50_01195        | Pseudoalteromonas luteoviolacea                            | 686 |
| A0A0C2NYS8 | General secretion pathway protein GspD       | OJ16_03070        | Vibrio renipiscarius                                       | 673 |
| A0A0C3DFT5 | General secretion pathway protein GspD       | SU60_15285        | Vibrio mytili                                              | 673 |
| A0A0D8LHW0 | General secretion pathway protein GspD       | UB36_18030        | Photobacterium damsela subsp. damsela (Listonella damsela) | 674 |

|            |                                                                                |                            |                                                                               |     |
|------------|--------------------------------------------------------------------------------|----------------------------|-------------------------------------------------------------------------------|-----|
| A0A0D8MIS0 | General secretion pathway protein GspD                                         | UB39_16625                 | Photobacterium angustum                                                       | 675 |
| A0A0D8Q070 | General secretion pathway protein GspD                                         | UB37_07800                 | Photobacterium iliopiscarium                                                  | 672 |
| A0A0E0YJD7 | General secretion pathway protein D                                            | AMEC673_18935              | Alteromonas macleodii (strain English Channel 673)                            | 683 |
| A0A0E3VZD8 | General secretion pathway protein D                                            | gspD<br>HBTMEAM1_210088    | Candidatus Hamiltonella defensa (Bemisia tabaci)                              | 686 |
| A0A0F2H8Y3 | General secretion pathway protein GspD                                         | UF06_21900                 | Vibrio sp. S234-5                                                             | 672 |
| A0A0F4NID0 | General secretion pathway protein GspD                                         | TW84_23100                 | Vibrio neptunius                                                              | 678 |
| A0A0F4NLW4 | General secretion pathway protein GspD                                         | TW81_04640                 | Vibrio galatheae                                                              | 675 |
| A0A0F4P8Q5 | General secretion pathway protein GspD                                         | TW75_06470                 | Pseudoalteromonas piscicida                                                   | 688 |
| A0A0F4PQ47 | General secretion pathway protein GspD                                         | TW72_01430                 | Pseudoalteromonas ruthenica                                                   | 688 |
| A0A0F4QDE6 | General secretion pathway protein GspD                                         | TW77_21685                 | Pseudoalteromonas rubra                                                       | 686 |
| A0A0F5AR84 | General secretion pathway protein GspD                                         | WN56_07425                 | Salinivibrio sp. KP-1                                                         | 665 |
| A0A0H0Y1F2 | General secretion pathway protein GspD                                         | VVYB158_11225              | Vibrio vulnificus CladeA-yb158                                                | 672 |
| A0A0H2MTE5 | General secretion pathway protein GspD                                         | ZX61_07875                 | Vibrio sp. VPAP30                                                             | 676 |
| A0A0K6H6Q4 | Type II secretion system protein D                                             | Ga0061064_1510             | Idiomarina woesei                                                             | 730 |
| A0A0L0EW91 | General secretion pathway protein GspD (Type II secretion system protein GspD) | AC626_03250<br>AT705_13705 | Pseudoalteromonas rubra                                                       | 686 |
| A0A0L1L710 | General secretion pathway protein GspD                                         | ACS79_15805                | Vibrio lentus                                                                 | 674 |
| A0A0L7YJQ7 | General secretion pathway protein GspD                                         | ACS86_19330                | Vibrio alginolyticus                                                          | 677 |
| A0A0M0HL95 | General secretion pathway protein GspD                                         | AKJ17_13010                | Vibrio nereis                                                                 | 674 |
| A0A0M0HX21 | General secretion pathway protein GspD                                         | AKJ31_15165                | Vibrio hepatarius                                                             | 672 |
| A0A0M0M7W7 | General secretion pathway protein GspD                                         | WH43_03715                 | Rheinheimera sp. KL1                                                          | 693 |
| A0A0M2T603 | General secretion pathway protein GspD                                         | SD53_08530                 | Rheinheimera mesophila                                                        | 697 |
| A0A0M2V2P2 | General secretion pathway protein GspD                                         | WG68_14970                 | Arsukibacterium ikkense                                                       | 688 |
| A0A0M2VC79 | General secretion pathway protein GspD                                         | VT06_11460                 | Arsukibacterium sp. MJ3                                                       | 690 |
| A0A0N0DL14 | General secretion pathway protein GspD                                         | VT25_01490                 | Photobacterium leiognathi subsp. mandapamensis (Photobacterium mandapamensis) | 677 |
| A0A0N1EJL4 | General secretion pathway protein GspD                                         | ADS77_20355                | Pseudoalteromonas porphyrae                                                   | 686 |
| A0A0N8TW84 | Type II secretion system protein D                                             | pulD AN392_03499           | Pseudoalteromonas sp. P1-16-1b                                                | 687 |
| A0A0P6Z6C1 | General secretion pathway protein GspD                                         | AN167_11180                | Vibrio splendidus                                                             | 674 |
| A0A0P7DJK6 | Type II secretion system protein GspD                                          | AOG27_20435                | Pseudoalteromonas lipolytica                                                  | 687 |
| A0A0P7XNR1 | Type 2a secretion system secretin GspD                                         | gspD HLUCCO02_07120        | Idiomarinaceae bacterium HL-53                                                | 694 |
| A0A0P9FTN3 | Type II secretion system protein D                                             | pulD_2 AN390_03838         | Pseudoalteromonas sp. P1-11                                                   | 689 |
| A0A0P9I655 | Type II secretion system protein D                                             | pulD AN214_01337           | Pseudoalteromonas sp. P1-9                                                    | 689 |
| A0A0Q2MF39 | Type II secretion system protein GspD                                          | AMR76_08725                | Vibrio furnissii                                                              | 675 |

|            |                                                                            |                              |                                                   |     |
|------------|----------------------------------------------------------------------------|------------------------------|---------------------------------------------------|-----|
| A0A0S1YQF5 | General secretion pathway protein D                                        | AOR13_3659                   | Alteromonas stellipolaris LMG 21856               | 680 |
| A0A0S2JJA4 | Type II secretion system protein GspD                                      | CMT41_16135                  | Colwellia sp. MT41                                | 692 |
| A0A0S2K6C1 | General secretion pathway protein D                                        | PP2015_3108                  | Pseudoalteromonas phenolica                       | 687 |
| A0A0T5PG51 | General secretion pathway protein GspD                                     | AAY72_15180                  | Alishewanella sp. WH16-1                          | 699 |
| A0A0U2JJS9 | Type II secretion system protein GspD                                      | AT746_18455                  | Lacimicrobium alkaliphilum                        | 687 |
| A0A0U2WIC4 | General secretion pathway protein D                                        | gspD PTRA_a0248              | Pseudoalteromonas translucida KMM 520             | 688 |
| A0A0W1KS66 | Type II secretion system protein GspD                                      | ATS75_19555                  | Pseudoalteromonas sp. H105                        | 687 |
| A0A0W1LOW2 | Type II secretion system protein GspD                                      | ATS76_18555                  | Pseudoalteromonas sp. 10-33                       | 687 |
| A0A0W1L249 | Type II secretion system protein GspD                                      | ATS74_19325                  | Pseudoalteromonas sp. H103                        | 690 |
| A0A0W1SUL9 | Type II secretion system protein GspD                                      | AUR68_10140                  | Idiomarina sp. H105                               | 687 |
| A0A0W8JAC9 | General secretion pathway protein D (Cholera toxin secretion protein epsD) | VRK_39200                    | Vibrio sp. MEBiC08052                             | 661 |
| A0A109DBI8 | Type II secretion system protein GspD                                      | APQ14_00335                  | Vibrio toranzoniae                                | 674 |
| A0A109X3U7 | Type II secretion system protein GspD                                      | AL536_21270                  | Vibrio fluvialis                                  | 678 |
| A0A124GPI8 | Type II secretion system protein GspD                                      | AR688_02050                  | Rheinheimera sp. EpRS3                            | 706 |
| A0A125WTP0 | Type II secretion system protein D                                         | AB97_5387                    | Escherichia coli 1-110-08_S3_C1                   | 691 |
| A0A135ZZ67 | Type II secretion system protein GspD                                      | AX660_18025                  | Paraglaciecola sp. S66                            | 682 |
| A0A136I109 | Type II secretion system protein GspD                                      | AXW14_09010                  | Alteromonas sp. Nap_26                            | 666 |
| A0A139C570 | General secretion pathway protein D                                        | AWU56_47                     | Idiomarina sp. T82-3                              | 695 |
| A0A142BHQ1 | General secretion pathway protein D                                        | gspD1 EZMO1_4360             | Endozoicomonas montiporae CL-33                   | 719 |
| A0A151JIJ7 | Type II secretion system protein GspD                                      | AUQ44_09210                  | Vibrio cidicii                                    | 673 |
| A0A161ZS35 | General secretion pathway protein D                                        | N475_24905                   | Pseudoalteromonas luteoviolacea DSM 6061          | 686 |
| A0A165KUH7 | Type II secretion system protein GspD                                      | A1L58_10990                  | Shewanella baltica                                | 704 |
| A0A165SBZ7 | Type II secretion system protein GspD                                      | A3712_06560                  | Vibrio sp. HI00D65                                | 678 |
| A0A167F324 | General secretion pathway protein D                                        | N476_12160                   | Pseudoalteromonas luteoviolacea H33               | 687 |
| A0A178J9B9 | Type II secretion system protein GspD                                      | AZ468_12640                  | Vibrio europaeus                                  | 675 |
| A0A193K8F6 | Type II secretion system protein GspD                                      | A6E01_00710                  | Vibrio breoganii                                  | 676 |
| A0A1A6KV05 | Type II secretion system protein GspD                                      | A9264_04090                  | Vibrio sp. UCD-FRSSP16_10                         | 675 |
| A0A1A6LA73 | Type II secretion system protein GspD                                      | A9262_20120                  | Vibrio splendidus                                 | 674 |
| A0A1A6W3Q9 | Type II secretion system protein GspD                                      | AYY27_13850                  | Photobacterium damsela                            | 668 |
| A0A1A9AU38 | Pullulanase secretion envelope pulD                                        | pulD_1<br>SAMEA2665130_00201 | Plesiomonas shigelloides (Aeromonas shigelloides) | 684 |
| A0A1A9AVM5 | Pullulanase secretion envelope pulD                                        | pulD_2<br>SAMEA2665130_00785 | Plesiomonas shigelloides (Aeromonas shigelloides) | 708 |
| A0A1B1BR17 | Type II secretion system protein GspD                                      | A134_00955                   | Vibrio crassostreae 9CS106                        | 674 |

|            |                                           |                      |                                                     |     |
|------------|-------------------------------------------|----------------------|-----------------------------------------------------|-----|
| A0A1B1E8H9 | Type II secretion system protein GspD     | BA894_00760          | Vibrio natriegens                                   | 673 |
| A0A1B1NK66 | Type II secretion system protein          | VSVS12_00289         | Vibrio scophthalmi                                  | 674 |
| A0A1B7UFI3 | Type II secretion system protein GspD     | A5320_19650          | Rheinheimera sp. SA_1                               | 693 |
| A0A1B8I9K7 | Type II secretion system protein GspD     | AYY24_18760          | Photobacterium phosphoreum                          | 674 |
| A0A1B9NV67 | Type II secretion system protein GspD     | A6E04_17200          | Aliivibrio logei (Vibrio logei)                     | 679 |
| A0A1B9P569 | Type II secretion system protein GspD     | A6E13_10145          | Aliivibrio fischeri (Vibrio fischeri)               | 678 |
| A0A1B9PM84 | Type II secretion system protein GspD     | A6E06_16685          | Aliivibrio sp. 1S175                                | 677 |
| A0A1B9PVJ7 | Type II secretion system protein GspD     | A6E08_07170          | Vibrio lentus                                       | 674 |
| A0A1B9QVD0 | Type II secretion system protein GspD     | A6E14_00625          | Vibrio genomosp. F10                                | 676 |
| A0A1C3EJQ4 | Type II secretion system protein GspD     | A8L45_10445          | Enterovibrio pacificus                              | 665 |
| A0A1C3IRV5 | Type II secretion system protein D        | pulD_2 VAT7223_02038 | Vibrio atlanticus                                   | 674 |
| A0A1C3IUT4 | Type II secretion system protein D        | pulD_1 VHE8714_02590 | Vibrio hemicentroti                                 | 673 |
| A0A1C7FDK5 | Type II secretion system protein          | VSVS05_02719         | Vibrio scophthalmi                                  | 673 |
| A0A1D2X6G0 | Type II secretion system protein GspD     | ACH42_15185          | Endozoicomonas sp. (ex Bugula neritina AB1)         | 695 |
| A0A1D8S131 | Type II secretion system protein GspD     | A3Q34_08370          | Colwellia sp. PAMC 20917                            | 690 |
| A0A1E3WYI4 | Type II secretion system protein GspD     | BCD66_07960          | Pseudoalteromonas tetradonis                        | 688 |
| A0A1E5E947 | Type II secretion system protein GspD     | A163_01015           | Vibrio tasmaniensis 1F-267                          | 674 |
| A0A1E5IW96 | Type II secretion system protein GspD     | BEL05_01955          | Shewanella colwelliana (Alteromonas colwelliana)    | 706 |
| A0A1E7D912 | Type II secretion system protein D        | gspD Bfv94_4083      | Alteromonas macleodii (Pseudoalteromonas macleodii) | 683 |
| A0A1E7Q245 | Type II secretion system protein GspD     | BI198_00430          | Rheinheimera salexigens                             | 710 |
| A0A1E7ZDR6 | Type II secretion system protein GspD     | BFC18_07935          | Alteromonas confluentis                             | 677 |
| A0A1E8FCD0 | Type II secretion system protein GspD     | BFC17_02210          | Alteromonas lipolytica                              | 681 |
| A0A1H6ASV5 | General secretion pathway protein D       | SAMN04488244_11696   | Vibrio hangzhouensis                                | 657 |
| A0A1I7CRT9 | General secretion pathway protein D       | SAMN04487854_12924   | Pseudoalteromonas lipolytica                        | 687 |
| A0A1J0RZ46 | Type II secretion system protein GspD     | BM527_18400          | Alteromonas sp. Mex14                               | 665 |
| A0A1J0TIV3 | Type II secretion system protein GspD     | BM528_17395          | Alteromonas sp. RW2A1                               | 681 |
| A0A1L8MJP7 | Type II secretion system protein GspD     | BK026_13990          | Alteromonas sp. V450                                | 665 |
| A0A1M5FAI0 | General secretion pathway protein D       | SAMN05216361_0751    | Aestuariibacter aggregatus                          | 686 |
| A0A1M5FR01 | General secretion pathway protein D       | SAMN02745781_03542   | Vibrio gazogenes DSM 21264                          | 661 |
| A0A1M5YUW5 | Type II secretion system protein D        | pulD_1 VA7868_02003  | Vibrio aerogenes CECT 7868                          | 676 |
| A0A1M5Z8V4 | General secretion pathway protein D       | SAMN02745129_0021    | Ferrimonas marina                                   | 713 |
| A0A1M7Z098 | Type II secretion system protein D        | pulD_2 VQ7734_04129  | Vibrio quintilis                                    | 676 |
| A0A1N6M4Y3 | Type II secretion system protein D        | pulD VSP9026_02108   | Vibrio sp. CECT 9026                                | 663 |
| A0A1N7A2Y5 | Type II secretion system protein D (GspD) | SAMN05421840_11632   | Shewanella morhuae                                  | 702 |

|            |                                                                            |                        |                                                              |     |
|------------|----------------------------------------------------------------------------|------------------------|--------------------------------------------------------------|-----|
| A0A1Q1PDN2 | Type II secretion system protein D                                         | pulD_1 Vca1114GL_01835 | Vibrio campbellii                                            | 681 |
| A0A1Q2GXQ5 | Type II secretion system protein GspD                                      | B0W48_08920            | Pseudoalteromonas aliena                                     | 687 |
| A0A1Q9HBH3 | Type II secretion system protein GspD                                      | BIY21_03770            | Vibrio ponticus                                              | 671 |
| A0A1R3EXV0 | Type II secretion system protein GspD                                      | BH581_02195            | Vibrio splendidus                                            | 673 |
| A0A1R4K015 | General secretion pathway protein D                                        | FM109_15115            | Vibrio sp. JB196                                             | 671 |
| A0A1R4LPW1 | Type II secretion system protein D                                         | pulD VR7878_02915      | Vibrio ruber DSM 16370                                       | 677 |
| A0A1S1MMU3 | Type II secretion system protein GspD                                      | BET10_01320            | Pseudoalteromonas sp. JW1                                    | 690 |
| A0A1S1NH45 | Type II secretion system protein GspD                                      | BIW53_00480            | Pseudoalteromonas byunsanensis                               | 688 |
| A0A1S2CN32 | Type II secretion system protein GspD                                      | BI375_06715            | Vibrio rotiferianus                                          | 674 |
| A0A1S2SZ53 | Type II secretion system protein GspD                                      | BFR57_02235            | Idiomarina sp. MD25a                                         | 695 |
| A0A1S6HYF0 | Type II secretion system protein D                                         | Sps_05455              | Shewanella psychrophila                                      | 721 |
| A0A1S8F5Z8 | Type II secretion system protein GspD                                      | BZG77_10640            | Salinivibrio sp. IB643                                       | 659 |
| A0A1T4RTK5 | General secretion pathway protein D                                        | SAMN02745782_02813     | Vibrio cincinnatiensis DSM 19608                             | 679 |
| A0A1T4U298 | Type II secretion system protein D                                         | pulD_2 CZ814_02671     | Photobacterium sp. H01100410B                                | 674 |
| A0A1T5I4J2 | Type II secretion system protein D                                         | pulD_2 CZ809_03558     | Photobacterium piscicola                                     | 672 |
| A1S1X4     | Type II and III secretion system protein                                   | Sama_0169              | Shewanella amazonensis (strain ATCC BAA-1098 / SB2B)         | 703 |
| A3DAA8     | General secretion pathway protein D                                        | Sbal_4206              | Shewanella baltica (strain OS155 / ATCC BAA-1091)            | 705 |
| A3QJ37     | General secretion pathway protein D                                        | Shew_3619              | Shewanella loihica (strain ATCC BAA-1088 / PV-4)             | 707 |
| A5KYR3     | Type II secretory pathway, component EpsD                                  | VSWAT3_11126           | Vibrionales bacterium (strain SWAT-3)                        | 674 |
| A8G117     | General secretion pathway protein D                                        | Ssed_4358              | Shewanella sediminis (strain HAW-EB3)                        | 724 |
| A8GYT6     | General secretion pathway protein D                                        | Spea_0144              | Shewanella pealeana (strain ATCC 700345 / ANG-SQ1)           | 710 |
| A9D5J9     | General secretion pathway protein D                                        | KT99_02231             | Shewanella benthica KT99                                     | 711 |
| B0TMX6     | General secretion pathway protein D                                        | Shal_4174              | Shewanella halifaxensis (strain HAW-EB4)                     | 720 |
| B1KN27     | General secretion pathway protein D                                        | Swoo_4734              | Shewanella woodyi (strain ATCC 51908 / MS32)                 | 714 |
| B8CH36     | Type II and III secretion system protein:NoIW-like protein                 | swp_0186               | Shewanella piezotolerans (strain WP3 / JCM 13877)            | 721 |
| B8E3T2     | General secretion pathway protein D                                        | Sbal223_0153           | Shewanella baltica (strain OS223)                            | 706 |
| C4K366     | Uncharacterized protein                                                    | gspD HDEF_0241         | Hamiltonella defensa subsp. Acyrthosiphon pisum (strain 5AT) | 687 |
| C9P1Q9     | General secretion pathway protein D (Cholera toxin secretion protein epsD) | VIB_000407             | Vibrio metschnikovii CIP 69.14                               | 663 |
| D0I313     | Type II secretory pathway component EpsD                                   | VHA_000144             | Grimontia hollisae CIP 101886                                | 671 |
| D0IED4     | Type II secretory pathway component PulD                                   | VOA_003575             | Vibrio sp. RC586                                             | 675 |
| D0Z0Q8     | Putative type II secretory pathway component EpsD                          | VDA_003122             | Photobacterium damsela subsp. damsela CIP 102761             | 579 |

|        |                                     |                |                                                                         |     |
|--------|-------------------------------------|----------------|-------------------------------------------------------------------------|-----|
| D4ZEB1 | General secretion pathway protein D | gspD SVI_4201  | Shewanella violacea (strain JCM 10179 / CIP 106290 / LMG 19151 / DSS12) | 712 |
| E1SL34 | General secretion pathway protein D | Fbal_0214      | Ferrimonas balearica (strain DSM 9799 / CCM 4581 / PAT)                 | 723 |
| E3BIX5 | General secretion pathway protein D | VIBC2010_19825 | Vibrio caribbeanicus ATCC BAA-2122                                      | 674 |
| E6XGB2 | General secretion pathway protein D | Sput200_0391   | Shewanella putrefaciens (strain 200)                                    | 705 |
| E8LY79 | General secretion pathway protein D | VIBR0546_13372 | Vibrio brasiliensis LMG 20546                                           | 674 |
| E8M4Z5 | General secretion pathway protein D | VISI1226_16443 | Vibrio sinaloensis DSM 21326                                            | 675 |
| F2P4Z0 | General secretion pathway protein D | gspD PMSV_4049 | Photobacterium leiognathi subsp. mandapamensis svers.1.1.               | 677 |
| F4AHI3 | General secretion pathway protein D | Glaag_0143     | Glaciacola sp. (strain 4H-3-7+YE-5)                                     | 690 |
| F7NYC9 | General secretion pathway protein D | Rhein_2812     | Rheinheimera sp. A13L                                                   | 696 |
| F7RID7 | General secretion pathway protein D | SOHN41_00101   | Shewanella sp. HN-41                                                    | 685 |
| F7S076 | General secretion pathway protein D | A28LD_1738     | Idiomarina sp. A28L                                                     | 696 |
| F9S5E3 | General secretion pathway protein D | VII00023_14453 | Vibrio ichthyenteri ATCC 700023                                         | 675 |
| F9SJD9 | General secretion pathway protein D | VISP3789_20253 | Vibrio splendidus ATCC 33789                                            | 674 |
| F9SQD3 | General secretion pathway protein D | VIOR3934_06794 | Vibrio orientalis CIP 102891 = ATCC 33934                               | 675 |
| G4QNE2 | General secretion pathway protein D | gspD GNIT_3467 | Glaciacola nitratireducens (strain JCM 12485 / KCTC 12276 / FR1064)     | 690 |
| H1ADG7 | General secretion pathway protein D | gspD           | Shewanella livingstonensis                                              | 710 |
| H3ZF42 | General secretion pathway protein D | AJE_09884      | Alishewanella jeotgali KCTC 22429                                       | 697 |
| H5TAS9 | General secretion pathway protein D | pulD GPUN_1282 | Glaciacola punicea ACAM 611                                             | 684 |
| I1E159 | General secretion pathway protein D | epsD RNAN_3050 | Rheinheimera nanhaiensis E407-8                                         | 706 |
| I9DQN1 | General secretion pathway protein D | AGRI_11787     | Alishewanella agri BL06                                                 | 698 |
| K2KJQ9 | General secretion pathway protein D | B3C1_02050     | Gallaecimonas xiamenensis 3-C-1                                         | 696 |
| K2L638 | General secretion pathway protein D | A10D4_02710    | Idiomarina xiamenensis 10-D-4                                           | 709 |
| K6Y484 | General secretion pathway protein D | pulD GPAL_0724 | Glaciacola pallidula DSM 14239 = ACAM 615                               | 692 |
| K6YIC2 | General secretion pathway protein D | pulD GARC_0936 | Paraglaciocola arctica BSs20135                                         | 691 |
| K6YJH8 | General secretion pathway protein D | pulD GMES_1855 | Paraglaciocola mesophila KMM 241                                        | 689 |
| K6YYR1 | General secretion pathway protein D | pulD GLIP_3729 | Alliglaciocola lipolytica E3                                            | 682 |
| K7AHG1 | General secretion pathway protein D | C427_5484      | Paraglaciocola psychrophila 170                                         | 685 |
| K7AJC8 | General secretion pathway protein D | pulD GPLA_4431 | Paraglaciocola polaris LMG 21857                                        | 690 |
| L8DF70 | General secretion pathway protein D | PALB_36930     | Pseudoalteromonas luteoviolacea B = ATCC 29581                          | 690 |
| L8J363 | General secretion pathway protein D | C942_03972     | Photobacterium marinum                                                  | 669 |
| L8XMA0 | General secretion pathway protein D | B878_02641     | Vibrio campbellii CAIM 519 = NBRC 15631                                 | 676 |
| N6VWF3 | General secretion pathway protein D | J139_14025     | Pseudoalteromonas agarivorans S816                                      | 690 |

|        |                                                    |                        |                                                                                          |     |
|--------|----------------------------------------------------|------------------------|------------------------------------------------------------------------------------------|-----|
| Q010E8 | General secretion pathway protein D                | Shewmr7_0151           | Shewanella sp. (strain MR-7)                                                             | 700 |
| Q12T08 | Type II and III secretion system protein           | Sden_0121              | Shewanella denitrificans (strain OS217 / ATCC BAA-1090 / DSM 15013)                      | 705 |
| Q1YWZ3 | Putative type II secretory pathway, component EpsD | P3TCK_23583            | Photobacterium profundum 3TCK                                                            | 670 |
| Q1ZL65 | Putative type II secretory pathway, component EpsD | VAS14_23049            | Photobacterium angustum (strain S14 / CCUG 15956) (Vibrio sp. (strain S14 / CCUG 15956)) | 674 |
| Q2C2L5 | Putative type II secretory pathway, component EpsD | SKA34_00710            | Photobacterium sp. SKA34                                                                 | 672 |
| Q47VD4 | General secretion pathway protein D                | gspD CPS_4591          | Colwellia psychrerythraea (strain 34H / ATCC BAA-681) (Vibrio psychroerythus)            | 697 |
| Q5E1X7 | General secretion pathway protein D                | gspD VF_2474           | Vibrio fischeri (strain ATCC 700601 / ES114)                                             | 673 |
| Q5QYA4 | Type II secretory pathway, component PulD          | pulD IL2026            | Idiomarina loihiensis (strain ATCC BAA-735 / DSM 15497 / L2-TR)                          | 708 |
| Q6LLS6 | Putative type II secretory pathway, component EpsD | SO0166 PBPR3481        | Photobacterium profundum (strain SS9)                                                    | 670 |
| Q8RTI3 | General secretion pathway protein D (WmpD)         | PTD2_16766             | Pseudoalteromonas tunicata D2                                                            | 689 |
| S3DZY3 | General secretion pathway protein D                | gspD O1U_0831          | Candidatus Photodesmus katoptron Akat1                                                   | 669 |
| T8K999 | Type II secretion system protein D                 | G893_02121             | Escherichia coli KOEGE 71 (186a)                                                         | 685 |
| U1J8E4 | General secretion pathway protein D                | PCIT_15960             | Pseudoalteromonas citrea DSM 8771                                                        | 689 |
| U1L8B2 | General secretion pathway protein D                | PSPO_03035             | Pseudoalteromonas spongiae UST010723-006                                                 | 688 |
| U3AQV9 | Type II secretion system protein D                 | gspD VAZ01S_028_00210  | Vibrio azureus NBRC 104587                                                               | 681 |
| U3BA40 | Type II secretion system protein D                 | gspD VPR01S_04_02930   | Vibrio proteolyticus NBRC 13287                                                          | 676 |
| U3CQY9 | Putative general secretory pathway protein D       | VEZ01S_37_00780        | Vibrio ezurae NBRC 102218                                                                | 674 |
| U4E0L7 | General secretion pathway protein D                | epsD VIBNIFTn2_1640060 | Vibrio nigrapulchritudo FTn2                                                             | 677 |
| V4HQ07 | General secretion pathway protein D                | PL2TA16_05201          | Pseudoalteromonas luteoviolacea 2ta16                                                    | 686 |
| V5F1V4 | General secretion pathway protein D                | PLEI_0392              | Photobacterium leiognathi Iriyu.4.1                                                      | 676 |
| V5HED6 | Type II secretion system protein D                 | gspD VHA01S_003_00110  | Vibrio halioticoli NBRC 102217                                                           | 675 |
| W7R0U8 | General secretion pathway protein D                | DS2_05215              | Catenovulum agarivorans DS-2                                                             | 730 |

## Burkholderiales and *Pseudomonas aeruginosa/fluorescens/syringae* HxcQ

| Entry      | Protein names                                    | Gene names             | Organism                                                                                                                 | Length |
|------------|--------------------------------------------------|------------------------|--------------------------------------------------------------------------------------------------------------------------|--------|
| Q9I5P0     | Probable type II secretion system protein        | PA0685                 | <i>Pseudomonas aeruginosa</i> (strain ATCC 15692 / DSM 22644 / CIP 104116 / JCM 14847 / LMG 12228 / 1C / PRS 101 / PAO1) | 803    |
| A0A0M7MBB9 | Pullulanase secretion envelope pulD              | pulD_4 ERS370003_06267 | <i>Achromobacter</i> sp.                                                                                                 | 489    |
| A0A1R1JLJ6 | Type II secretion system protein GspD (Fragment) | BIZ92_32945            | <i>Alcaligenes xylosoxydans xylosoxydans</i> ( <i>Achromobacter xylosoxidans</i> )                                       | 515    |
| A0A0Q6N2T0 | Type II secretion system protein GspD (Fragment) | ASC78_06040            | <i>Variovorax</i> sp. Root318D1                                                                                          | 681    |
| A0A0S8DFZ5 | Uncharacterized protein                          | AMJ66_02010            | <i>Betaproteobacteria bacterium</i> SG8_40                                                                               | 675    |
| A0A0S9L735 | Uncharacterized protein                          | ASF45_33390            | <i>Pseudorhodofera</i> sp. Leaf265                                                                                       | 639    |
| A0A1P8JUK3 | Uncharacterized protein                          | RD110_09800            | <i>Rhodofera</i> sp. DCY110                                                                                              | 643    |
| A0A0J6KAN3 | General secretion pathway protein GspD           | VI26_09895             | <i>Chromobacterium</i> sp. LK1                                                                                           | 715    |
| A0A0J6NM59 | General secretion pathway protein GspD           | VK98_11730             | <i>Chromobacterium</i> sp. LK11                                                                                          | 717    |
| A0A1D9LG72 | Type II secretion system protein GspD            | BKX93_09895            | <i>Chromobacterium vaccinii</i>                                                                                          | 715    |
| A0A1R0MVB3 | Type II secretion system protein GspD            | BRL65_03115            | <i>Chromobacterium aquaticum</i>                                                                                         | 708    |
| A0A1S1X005 | Type II secretion system protein GspD            | BI347_04600            | <i>Chromobacterium</i> sp. 37-2                                                                                          | 711    |
| A0A1S1XB59 | Type II secretion system protein GspD            | BI343_13320            | <i>Chromobacterium amazonense</i>                                                                                        | 704    |
| U0Z619     | Uncharacterized protein                          | O166_15450             | <i>Pseudogulbenkiania ferrooxidans</i> EGD-HP2                                                                           | 710    |
| A0A0X8GLZ7 | Type II secretion system protein GspD            | VN23_01170             | <i>Janthinobacterium</i> sp. B9-8                                                                                        | 680    |
| A0A142LN84 | General secretion pathway protein GspD           | AEM42_07065            | <i>Betaproteobacteria bacterium</i> UKL13-2                                                                              | 656    |
| A0A1B4V3U1 | General secretion pathway protein D              | SVA_1640               | <i>Sulfurifustis variabilis</i>                                                                                          | 735    |
| A0A1B4XGF5 | General secretion pathway protein D              | SCL_1554               | <i>Sulfuricaulis limicola</i>                                                                                            | 767    |
| A0A1D9B990 | Type II secretion system protein GspD            | BJP62_00085            | <i>Jeongeupia</i> sp. USM3                                                                                               | 702    |
| A0A1E4HUE1 | Type II secretion system protein GspD (Fragment) | ABS89_08995            | <i>Thiobacillus</i> sp. SCN 63-1177                                                                                      | 806    |
| A0A1F6TQ20 | Type II secretion system protein GspD            | A2151_00775            | <i>Candidatus Muproteobacteria bacterium</i> RBG_16_65_34                                                                | 667    |
| A0A1F6U4I9 | Type II secretion system protein GspD (Fragment) | A3A87_02470            | <i>Candidatus Muproteobacteria bacterium</i> RIFCSPLOWO2_01_FULL_60_18                                                   | 614    |
| A0A1J4Z1X6 | Type II secretion system protein GspD            | AUJ86_07855            | <i>Hydrogenophilaceae bacterium</i> CG1_02_62_390                                                                        | 678    |
| A0A1Q4GS46 | Type II secretion system protein GspD            | BGP21_03810            | <i>Thiobacillus</i> sp. 65-29                                                                                            | 652    |
| N6YLK7     | General secretion pathway protein D              | B447_10323             | <i>Thauera</i> sp. 27                                                                                                    | 675    |
| A0A016XGX7 | General secretion pathway protein GspD           | AZ34_08210             | <i>Hylemonella gracilis</i> str. Niagara R                                                                               | 738    |



|            |                                                                              |                                        |                                                   |     |
|------------|------------------------------------------------------------------------------|----------------------------------------|---------------------------------------------------|-----|
| A0A031GRN4 | General secretion pathway protein D                                          | gspD_2 BW37_02982                      | Janthinobacterium lividum                         | 748 |
| A0A038H622 | General secretion pathway protein GspD                                       | BG58_30265                             | Caballeronia jiangsuensis                         | 800 |
| A0A059KHY7 | General secretion pathway protein D                                          | X805_33680                             | Sphaerotilus natans subsp. natans DSM 6575        | 735 |
| A0A060NFK6 | Type II secretory pathway, component PulD                                    | SRAA_0387                              | Comamonadaceae bacterium A1                       | 742 |
| A0A068YUZ5 | General secretion pathway protein D                                          |                                        | Polaromonas sp. CG9_12                            | 732 |
| A0A076PDH7 | General secretion pathway protein D                                          | O987_03425                             | Comamonas testosteroni TK102                      | 793 |
| A0A078BL83 | Putative general secretion pathway protein                                   | THICB2_430030                          | Thiomonas sp. CB2                                 | 888 |
| A0A085FY45 | General secretion pathway protein D                                          | FG94_00207                             | Massilia sp. LC238                                | 786 |
| A0A096C4Z4 | General secretion pathway protein D                                          | P368_14040                             | Comamonas testosteroni (Pseudomonas testosteroni) | 793 |
| A0A096H317 | General secretion pathway protein D (General secretion pathway protein GspD) | GL58_13945 P353_00905                  | Comamonas testosteroni (Pseudomonas testosteroni) | 792 |
| A0A098UCP7 | General secretion pathway protein GspD                                       | IA69_07510                             | Massilia sp. JS1662                               | 759 |
| A0A0A1FLJ5 | General secretion pathway protein D                                          | LT85_4604                              | Collimonas arenae                                 | 780 |
| A0A0A1VC07 | Type II secretory pathway, component PulD (Fragment)                         | AVS7_00425                             | Acidovorax sp. MR-S7                              | 722 |
| A0A0D0MGL2 | General secretion pathway protein GspD                                       | RT97_18365                             | Variovorax paradoxus                              | 770 |
| A0A0D7K9L6 | General secretion pathway protein GspD                                       | RP29_14290                             | Acidovorax temperans                              | 834 |
| A0A0E9MB58 | General secretion pathway protein GspD                                       | SCT_0020                               | Sulfuricella sp. T08                              | 667 |
| A0A0G3BPX8 | General secretion pathway protein GspD                                       | gspD AAW51_4793                        | [Polyangium] brachysporum                         | 774 |
| A0A0H2M6F2 | Type II secretion system protein D                                           | xcpQ VPARA_12240                       | Variovorax paradoxus                              | 772 |
| A0A0J0US83 | General secretion pathway protein GspD                                       | OX89_00295                             | Diaphorobacter sp. J5-51                          | 781 |
| A0A0K6HWP9 | Type II secretion system protein D (GspD)                                    | Ga0061069_103111                       | Thiomonas bhubaneswarensis                        | 876 |
| A0A0K8NVX8 | General secretion pathway protein D                                          | ISF6_4727                              | Ideonella sakaiensis (strain 201-F6)              | 792 |
| A0A0L6TG09 | General secretion pathway protein GspD                                       | AD742_01690                            | Methylibium sp. NZG                               | 735 |
| A0A0L6VVR5 | General secretion pathway protein GspD                                       | AB595_26945                            | Massilia sp. WF1                                  | 779 |
| A0A0L8B1W7 | General secretion pathway protein GspD                                       | H663_00115                             | Limnohabitans planktonicus II-D5                  | 708 |
| A0A0N0JE75 | Type II secretion system protein GspD                                        | IP80_04600                             | beta proteobacterium AAP65                        | 715 |
| A0A0N1ATF0 | Type II secretion system protein GspD                                        | D621_07800                             | beta proteobacterium AAP51                        | 726 |
| A0A0N1LDD5 | Uncharacterized protein                                                      | IP84_04555                             | beta proteobacterium AAP99                        | 698 |
| A0A0N8P5R1 | Type II secretion system protein GspD                                        | APR48_43505 APR50_07035<br>APR52_30375 | Variovorax paradoxus                              | 776 |
| A0A0P0M763 | Type II secretion system protein D                                           | xcpQ L63ED372_00255                    | Limnohabitans sp. 63ED37-2                        | 734 |
| A0A0P0MD68 | Type II secretion system protein D                                           | xcpQ L103DPR2_00652                    | Limnohabitans sp. 103DPR2                         | 716 |
| A0A0Q0Y4M8 | General secretion pathway protein GspD                                       | AE621_16820                            | Acidovorax sp. SD340                              | 870 |

|            |                                       |                         |                              |     |
|------------|---------------------------------------|-------------------------|------------------------------|-----|
| A0A0Q4RIG4 | Type II secretion system protein GspD | ASF16_17465             | Acidovorax sp. Leaf78        | 821 |
| A0A0Q4YM57 | Type II secretion system protein GspD | ASF43_05280             | Pseudorhodofera sp. Leaf267  | 800 |
| A0A0Q5H5L9 | Type II secretion system protein GspD | ASF77_15980             | Massilia sp. Leaf139         | 743 |
| A0A0Q5MKK4 | Type II secretion system protein GspD | ASF94_01800             | Acidovorax sp. Leaf160       | 805 |
| A0A0Q5ZI59 | Type II secretion system protein GspD | ASG30_00160             | Ramlibacter sp. Leaf400      | 734 |
| A0A0Q6LX62 | Type II secretion system protein GspD | ASC88_08475             | Rhizobacter sp. Root29       | 740 |
| A0A0Q6T1M0 | Type II secretion system protein GspD | ASC93_15875             | Massilia sp. Root335         | 784 |
| A0A0Q6U3T5 | Type II secretion system protein GspD | ASC95_06565             | Pelomonas sp. Root1217       | 746 |
| A0A0Q6WIR7 | Type II secretion system protein GspD | ASC91_20275             | Pelomonas sp. Root1237       | 751 |
| A0A0Q6XTD0 | Type II secretion system protein GspD | ASC87_13000             | Rhizobacter sp. Root1221     | 745 |
| A0A0Q6ZFA8 | Type II secretion system protein GspD | ASC83_02950             | Acidovorax sp. Root402       | 758 |
| A0A0Q7AU18 | Type II secretion system protein GspD | ASC76_01015             | Rhizobacter sp. Root404      | 751 |
| A0A0Q7BVX5 | Type II secretion system protein GspD | ASC81_03360             | Pelomonas sp. Root405        | 744 |
| A0A0Q7CHG9 | Type II secretion system protein GspD | ASC92_00815             | Variovorax sp. Root411       | 764 |
| A0A0Q7DDE8 | Type II secretion system protein GspD | ASC67_04185             | Methylbium sp. Root1272      | 732 |
| A0A0Q7ELA8 | Type II secretion system protein GspD | ASC94_21340             | Massilia sp. Root418         | 733 |
| A0A0Q7LIA3 | Type II secretion system protein GspD | ASD34_23370             | Variovorax sp. Root473       | 778 |
| A0A0Q7SZY5 | Type II secretion system protein GspD | ASD35_16275             | Pelomonas sp. Root1444       | 752 |
| A0A0Q7W004 | Type II secretion system protein GspD | ASD58_17480             | Duganella sp. Root1480D1     | 735 |
| A0A0Q7WYP0 | Type II secretion system protein GspD | ASD92_03800             | Massilia sp. Root1485        | 757 |
| A0A0Q8L0L3 | Type II secretion system protein GspD | ASD94_11595             | Acidovorax sp. Root70        | 760 |
| A0A0Q8RII7 | Type II secretion system protein GspD | ASE26_18980             | Duganella sp. Root198D2      | 735 |
| A0A0Q8TBJ7 | Type II secretion system protein GspD | ASE31_15235             | Acidovorax sp. Root217       | 825 |
| A0A0Q8TLD5 | Type II secretion system protein GspD | ASE28_14555             | Acidovorax sp. Root219       | 823 |
| A0A0Q9CUE9 | Type II secretion system protein GspD | ASE52_21350             | Acidovorax sp. Root275       | 821 |
| A0A0S4P2X8 | General secretion pathway protein D   | BN2497_8051 BN3177_8051 | Janthinobacterium sp. CG23_2 | 750 |
| A0A0S9EVS9 | Type II secretion system protein GspD | ASF11_05255             | Acidovorax sp. Leaf76        | 834 |
| A0A0S9KSD7 | Type II secretion system protein GspD | ASF45_16320             | Pseudorhodofera sp. Leaf265  | 721 |
| A0A0S9NTH2 | Type II secretion system protein GspD | ASF44_22100             | Pseudorhodofera sp. Leaf274  | 791 |
| A0A0T2ZC47 | Type II secretion system protein GspD | ASE11_22665             | Hydrogenophaga sp. Root209   | 707 |
| A0A0U3NA82 | General secretion pathway protein D   | RD2015_944              | Roseateles depolymerans      | 755 |
| A0A109D2B7 | General secretion pathway protein D   | APY03_1550              | Variovorax sp. WDL1          | 760 |
| A0A126ZA14 | Type II secretion system protein GspD | AX767_05955             | Variovorax sp. PAMC 28711    | 759 |
| A0A127PIR1 | Type II secretion system protein D    | gspD CFter6_4940        | Collimonas fungivorans       | 760 |

|            |                                                                             |                                 |                                                            |     |
|------------|-----------------------------------------------------------------------------|---------------------------------|------------------------------------------------------------|-----|
| A0A127QBV6 | Type II secretion system protein D                                          | gspD CPter91_5037               | Collimonas pratensis                                       | 765 |
| A0A139BV22 | General secretion pathway protein GspD                                      | AWT59_1043                      | Candidatus Gallionella acididurans                         | 814 |
| A0A147GN38 | General secretion pathway protein GspD                                      | NS331_21075                     | Pseudacidovorax intermedius                                | 772 |
| A0A165KP54 | Type II secretion system protein GspD                                       | A1D30_09315                     | Acidovorax sp. GW101-3H11                                  | 748 |
| A0A167HPQ8 | Type II secretion system protein GspD                                       | LPB072_03010                    | Hydrogenophaga sp. LPB0072                                 | 682 |
| A0A1A6DU88 | Type II secretion system protein GspD                                       | A9O67_04095                     | Tepidimonas fonticaldi                                     | 712 |
| A0A1A7BUS8 | General secretion pathway protein D                                         | ASR47_1002314                   | Janthinobacterium sp. S3-2                                 | 756 |
| A0A1B3M4I6 | Type II secretion system protein D                                          | gspD BSY239_3156                | Hydrogenophaga sp. RAC07                                   | 726 |
| A0A1B3PGW3 | Type II secretion system protein D                                          | gspD BSY15_2167                 | Acidovorax sp. RAC01                                       | 882 |
| A0A1C6PLG7 | General secretion pathway protein D                                         | VAR608DRAFT_4271                | Variovorax sp. HW608                                       | 755 |
| A0A1C9VAP8 | Type II secretion system protein GspD                                       | Q5W_01945                       | Hydrogenophaga sp. PBC                                     | 742 |
| A0A1D2S1V8 | Type II secretion system protein GspD                                       | ABS38_01950                     | Acidovorax sp. SCN 68-22                                   | 755 |
| A0A1D2U5S9 | Type II secretion system protein GspD                                       | ABT03_09555                     | Comamonas sp. SCN 67-35                                    | 773 |
| A0A1D8J7I6 | General secretion pathway protein D (Type II secretion system protein GspD) | BI380_26565 SAMN05444579_102194 | Delftia tsuruhatensis                                      | 789 |
| A0A1E3YXW8 | Type II secretion system protein GspD                                       | ABS37_04930                     | Acidovorax sp. SCN 65-108                                  | 830 |
| A0A1E4IIM3 | Type II secretion system protein GspD                                       | ABS84_08465                     | Rubrivivax sp. SCN 71-131                                  | 740 |
| A0A1E4IYR1 | Type II secretion system protein GspD                                       | ABS94_18675                     | Variovorax sp. SCN 67-85                                   | 763 |
| A0A1E4LUG6 | Type II secretion system protein GspD                                       | ABT02_08810                     | Comamonadaceae bacterium SCN 68-20                         | 784 |
| A0A1E7U6F3 | Type II secretion system protein GspD                                       | AO062_05430                     | Variovorax boronicumulans                                  | 777 |
| A0A1F3WXU9 | Type II secretion system protein GspD                                       | A2V79_02285                     | Betaproteobacteria bacterium RBG_16_56_24                  | 727 |
| A0A1F3ZY75 | Type II secretion system protein GspD                                       | A3H35_10480                     | Betaproteobacteria bacterium<br>RIFCSPLOWO2_02_FULL_62_17  | 640 |
| A0A1F4B424 | Type II secretion system protein GspD                                       | A3H32_01095                     | Betaproteobacteria bacterium<br>RIFCSPLOWO2_02_FULL_63_19  | 711 |
| A0A1F4CGZ0 | Type II secretion system protein GspD                                       | A3F75_06910                     | Betaproteobacteria bacterium<br>RIFCSPLOWO2_12_FULL_64_23  | 673 |
| A0A1F4CLZ1 | Type II secretion system protein GspD                                       | A3G26_04480                     | Betaproteobacteria bacterium<br>RIFCSPLOWO2_12_FULL_65_110 | 714 |
| A0A1F4CQD8 | Type II secretion system protein GspD                                       | A3G28_06220                     | Betaproteobacteria bacterium<br>RIFCSPLOWO2_12_FULL_68_19  | 686 |
| A0A1F4EC50 | Type II secretion system protein GspD                                       | A2710_27060                     | Burkholderiales bacterium<br>RIFCSPHIGHO2_01_FULL_64_960   | 829 |
| A0A1F4G7N6 | Type II secretion system protein GspD                                       | A2711_05015                     | Burkholderiales bacterium<br>RIFCSPHIGHO2_01_FULL_63_240   | 756 |
| A0A1F4GZQ5 | Type II secretion system protein GspD                                       | A2X72_13865                     | Burkholderiales bacterium GWF1_66_17                       | 697 |

|            |                                           |                     |                                                         |     |
|------------|-------------------------------------------|---------------------|---------------------------------------------------------|-----|
| A0A1F4HNX9 | Type II secretion system protein GspD     | A3E25_04130         | Burkholderiales bacterium<br>RIFCSPHIGHO2_12_FULL_69_20 | 713 |
| A0A1F4J737 | Type II secretion system protein GspD     | A3I64_04120         | Burkholderiales bacterium<br>RIFCSPLOWO2_02_FULL_67_64  | 727 |
| A0A1F4JZD9 | Type II secretion system protein GspD     | A3I66_07360         | Burkholderiales bacterium<br>RIFCSPLOWO2_02_FULL_57_36  | 735 |
| A0A1F4KE56 | Type II secretion system protein GspD     | A3F78_21805         | Burkholderiales bacterium<br>RIFCSPLOWO2_12_FULL_61_40  | 714 |
| A0A1F4LLF4 | Type II secretion system protein GspD     | A3F76_10685         | Burkholderiales bacterium<br>RIFCSPLOWO2_12_FULL_65_40  | 687 |
| A0A1F4M4D7 | Type II secretion system protein GspD     | A2503_08875         | Burkholderiales bacterium<br>RIFOXYD12_FULL_59_19       | 695 |
| A0A1F4MQS2 | Type II secretion system protein GspD     | A3G29_11510         | Burkholderiales bacterium<br>RIFCSPLOWO2_12_FULL_64_99  | 758 |
| A0A1F4NIW2 | Type II secretion system protein GspD     | A2486_10390         | Burkholderiales bacterium<br>RIFOXYC12_FULL_65_23       | 713 |
| A0A1F8VIM4 | Type II secretion system protein GspD     | A2037_12920         | Curvibacter sp. GWA2_63_95                              | 701 |
| A0A1G0D0C4 | Type II secretion system protein GspD     | A3H31_07465         | Gallionellales bacterium<br>RIFCSPLOWO2_02_FULL_57_47   | 717 |
| A0A1G0DKQ5 | Type II secretion system protein GspD     | A2Z65_05090         | Gallionellales bacterium<br>RIFCSPLOWO2_02_58_13        | 712 |
| A0A1G0ETT8 | Type II secretion system protein GspD     | A3J49_19275         | Gallionellales bacterium<br>RIFCSPHIGHO2_02_FULL_57_16  | 721 |
| A0A1G0EUN3 | Type II secretion system protein GspD     | A3J49_11980         | Gallionellales bacterium<br>RIFCSPHIGHO2_02_FULL_57_16  | 746 |
| A0A1H5SRF5 | General secretion pathway protein D       | SAMN03159365_00225  | Variovorax sp. NFACC29                                  | 779 |
| A0A1I7JC14 | General secretion pathway protein D       | SAMN04489707_102441 | Acidovorax caeni                                        | 789 |
| A0A1I9Y3K2 | General secretion pathway protein GspD    | YQ44_25440          | Janthinobacterium sp. 1_2014MBL_MicDiv                  | 747 |
| A0A1J4RWC7 | Type II secretion system protein GspD     | AUJ20_11290         | Comamonadaceae bacterium CG1_02_60_18                   | 709 |
| A0A1J5BIZ6 | Type II secretion system protein GspD     | AUK53_09215         | Betaproteobacteria bacterium CG2_30_59_46               | 676 |
| A0A1J5BZ98 | Type II secretion system protein GspD     | AUK51_09995         | Comamonadaceae bacterium CG2_30_59_20                   | 694 |
| A0A1J5C870 | Type II secretion system protein GspD     | AUK50_04105         | Comamonadaceae bacterium CG2_30_57_122                  | 701 |
| A0A1J5CNR8 | Type II secretion system protein GspD     | AUK52_10590         | Comamonadaceae bacterium CG2_30_60_41                   | 707 |
| A0A1K2HBQ0 | General secretion pathway protein D       | SAMN02745887_01054  | Chitinimonas taiwanensis DSM 18899                      | 683 |
| A0A1M3C261 | Type II secretion system protein GspD     | BGO13_05385         | Burkholderiales bacterium 66-5                          | 771 |
| A0A1M3JM63 | Type II secretion system protein GspD     | BGO74_02855         | Burkholderiales bacterium 68-12                         | 736 |
| A0A1M5E017 | General secretion pathway protein D       | SAMN02745117_02496  | Lampropedia hyalina DSM 16112                           | 817 |
| A0A1M5SN47 | Type II secretion system protein D (GspD) | SAMN05428948_3829   | Massilia sp. CF038                                      | 734 |

|            |                                                                                                   |                     |                                                                                                  |     |
|------------|---------------------------------------------------------------------------------------------------|---------------------|--------------------------------------------------------------------------------------------------|-----|
| A0A1M7FCS3 | General secretion pathway protein D                                                               | SAMN02787076_00345  | Rhizobacter sp. OV335                                                                            | 741 |
| A0A1M7TBN5 | Type II secretion system protein D (GspD)                                                         | SAMN05192549_112122 | Duganella sacchari                                                                               | 738 |
| A0A1N6P313 | Type II secretion system protein D (GspD)                                                         | SAMN05880566_101351 | Janthinobacterium sp. TND4EL3                                                                    | 743 |
| A0A1N6YYT4 | General secretion pathway protein D                                                               | SAMN05880557_108237 | Pseudacidovorax sp. RU35E                                                                        | 778 |
| A0A1P8JSS9 | Type II secretion system protein GspD                                                             | RD110_06035         | Rhodofera sp. DCY110                                                                             | 761 |
| A0A1Q3R1Z2 | Type II secretion system protein GspD                                                             | BGO36_14775         | Burkholderiales bacterium 68-10                                                                  | 777 |
| A0A1Q3RMQ4 | Type II secretion system protein GspD                                                             | BGO22_03215         | Hydrogenophaga sp. 70-12                                                                         | 742 |
| A0A1Q3X682 | Type II secretion system protein GspD                                                             | BGO62_10155         | Thiobacillus sp. 65-1402                                                                         | 687 |
| A0A1Q3XNU1 | Type II secretion system protein GspD                                                             | BGO66_00860         | Alicyclophilus sp. 69-12                                                                         | 778 |
| A0A1Q4GEU6 | Type II secretion system protein GspD                                                             | BGP20_14045         | Thiobacillus sp. 63-78                                                                           | 679 |
| A0A1S1U3C7 | General secretion pathway protein GspD                                                            | AKG95_26540         | Janthinobacterium lividum                                                                        | 745 |
| A0A1S8FZC7 | Type II secretion system protein GspD                                                             | B0E49_01110         | Polaromonas sp. C04                                                                              | 780 |
| A0A1S9A9S8 | Type II secretion system protein GspD                                                             | B0920_22605         | Massilia sp. KIM                                                                                 | 773 |
| A1TKM7     | General secretion pathway protein D                                                               | Aave_0917           | Acidovorax citrulli (strain AAC00-1) (Acidovorax avenae subsp. citrulli)                         | 810 |
| A1VK97     | General secretion pathway protein D                                                               | Pnap_0756           | Polaromonas naphthalenivorans (strain CJ2)                                                       | 738 |
| A1WNP1     | General secretion pathway protein D                                                               | Veis_3529           | Verminephrobacter eiseniae (strain EF01-2)                                                       | 740 |
| A2SKK0     | General secretion pathway protein D                                                               | gspD Mpe_A3136      | Methylbium petroleiphilum (strain ATCC BAA-1232 / LMG 22953 / PM1)                               | 736 |
| A9BXP9     | General secretion pathway protein D                                                               | Daci_5697           | Delftia acidovorans (strain DSM 14801 / SPH-1)                                                   | 787 |
| B1Y329     | General secretion pathway protein D                                                               | Lcho_3427           | Leptothrix cholodnii (strain ATCC 51168 / LMG 8142 / SP-6) (Leptothrix discophora (strain SP-6)) | 753 |
| C4K9Q5     | General secretion pathway protein D                                                               | Tmz1t_2529          | Thauera sp. (strain MZ1T)                                                                        | 728 |
| C5CPK3     | General secretion pathway protein D                                                               | Vapar_1073          | Variovorax paradoxus (strain S110)                                                               | 774 |
| C9YDY9     | Putative uncharacterized protein                                                                  | Csp_D27950          | Curvibacter putative symbiont of Hydra magnipapillata                                            | 711 |
| E6UWS7     | General secretion pathway protein D                                                               | Varpa_1156          | Variovorax paradoxus (strain EPS)                                                                | 770 |
| E8TZL0     | General secretion pathway protein D                                                               | Alide_0792          | Alicyclophilus denitrificans (strain DSM 18852 / JCM 14587 / BC)                                 | 777 |
| F0Q9I5     | General secretion pathway protein D                                                               | Acav_0869           | Acidovorax avenae (strain ATCC 19860 / DSM 7227 / JCM 20985 / NCPPB 1011)                        | 804 |
| F1VU14     | General secretion pathway protein D / Type II secretion outermembrane pore forming protein (PulD) | IMCC9480_3845       | Oxalobacteraceae bacterium IMCC9480                                                              | 696 |
| F3KWC1     | Type II and III secretion system protein                                                          | HGR_13794           | Hylemonella gracilis ATCC 19624                                                                  | 740 |

|            |                                                                                                |                    |                                                                                               |     |
|------------|------------------------------------------------------------------------------------------------|--------------------|-----------------------------------------------------------------------------------------------|-----|
| F5Y0R0     | Candidate secretin, general secretion pathway protein D, component of type II secretion system | gspD Rta_35410     | Ramlibacter tataouinensis (strain ATCC BAA-407 / DSM 14655 / LMG 21543 / TTB310)              | 735 |
| G0AE23     | General secretion pathway protein D                                                            | gspD CFU_4050      | Collimonas fungivorans (strain Ter331)                                                        | 764 |
| H0BZT1     | General secretion pathway protein D                                                            | KYG_14588          | Acidovorax sp. NO-1                                                                           | 725 |
| H5WHD3     | General secretion pathway protein D                                                            | BurJ1DRAFT_1122    | Burkholderiales bacterium JOSHI_001                                                           | 738 |
| I0HMA1     | Putative general secretion pathway protein D GspD                                              | gspD RGE_07950     | Rubrivivax gelatinosus (strain NBRC 100245 / IL144)                                           | 731 |
| J1EGV9     | General secretion pathway protein D (Fragment)                                                 | PMI14_03804        | Acidovorax sp. CF316                                                                          | 800 |
| K9DGT6     | General secretion pathway protein D                                                            | HMPREF9710_00577   | Massilia timonae CCUG 45783                                                                   | 804 |
| N6XFJ0     | General secretory pathway protein D                                                            | C664_02025         | Thauera sp. 63                                                                                | 711 |
| N6YRW5     | General secretion pathway protein D                                                            | C666_15955         | Thauera linaloolentis 47Lol = DSM 12138                                                       | 745 |
| N6ZPF9     | General secretion pathway protein D                                                            | C667_14172         | Thauera phenylacetica B4P                                                                     | 732 |
| Q12DW3     | Type II and III secretion system protein                                                       | Bpro_1329          | Polaromonas sp. (strain JS666 / ATCC BAA-500)                                                 | 747 |
| Q221L0     | Type II and III secretion system protein                                                       | Rfer_0542          | Rhodoferax ferrireducens (strain ATCC BAA-621 / DSM 15236 / T118) (Albidiferax ferrireducens) | 702 |
| S6AGJ8     | Type II and III secretion system protein                                                       | SCD_n01314         | Sulfuricella denitrificans skB26                                                              | 667 |
| U5NC55     | General secretion pathway protein D                                                            | gspD-2 Cenrod_1684 | Candidatus Symbiobacter mobilis CR                                                            | 701 |
| W0VA07     | General secretion pathway protein D                                                            | gspD GJA_5055      | Janthinobacterium agaricidamnosum NBRC 102515 = DSM 9628                                      | 742 |
| A0A023CCS3 | General secretion pathway protein GspD                                                         | PE143B_0110075     | Pseudomonas extremaustralis 14-3 substr. 14-3b                                                | 771 |
| A0A031G894 | Type II and III secretion system protein                                                       | BW33_01174         | Pseudomonas sp. RIT288                                                                        | 793 |
| A0A031J400 | Putative type II secretion pathway protein D                                                   | BW43_01373         | Pseudomonas sp. RIT357                                                                        | 768 |
| A0A031MJH1 | General secretion pathway protein GspD                                                         | CF98_07360         | Pseudomonas bauzanensis                                                                       | 868 |
| A0A064BPJ6 | General secretion pathway protein GspD                                                         | DF40_003795        | Stenotrophomonas maltophilia M30                                                              | 793 |
| A0A077LCS6 | General secretion pathway protein D                                                            | PSCI_1513          | Pseudomonas sp. StFLB209                                                                      | 784 |
| A0A095UUP1 | General secretion pathway protein GspD                                                         | JL37_17520         | Achromobacter sp. RTa                                                                         | 870 |
| A0A0A1HSP3 | General secretion pathway protein D                                                            | BN844_2055         | Pseudomonas sp. SHC52                                                                         | 784 |
| A0A0A2N441 | General secretion pathway protein GspD                                                         | JT27_14115         | Alcaligenes faecalis                                                                          | 770 |
| A0A0A6D540 | General secretion pathway protein GspD                                                         | NZ35_25905         | Pseudomonas chlororaphis                                                                      | 791 |
| A0A0A6D7X6 | General secretion pathway protein GspD                                                         | NZ35_18305         | Pseudomonas chlororaphis                                                                      | 800 |
| A0A0A8RHX5 | Putative type II secretion system protein                                                      | PAMH19_3901        | Pseudomonas aeruginosa                                                                        | 803 |
| A0A0B7DAW3 | Type II secretion system protein D                                                             | xcpQ SRM1_03003    | Pseudomonas fluorescens                                                                       | 784 |
| A0A0C1ZYI6 | General secretion pathway protein GspD                                                         | QS95_14380         | Pseudomonas fluorescens                                                                       | 783 |
| A0A0C2RK13 | General secretion pathway protein GspD                                                         | OC71_00095         | Pseudomonas sp. W15Feb9B                                                                      | 793 |

|            |                                        |                                                |                                                                                                           |     |
|------------|----------------------------------------|------------------------------------------------|-----------------------------------------------------------------------------------------------------------|-----|
| A0A0C5E8S6 | Uncharacterized protein                | TO66_14090                                     | <i>Pseudomonas</i> sp. MRSN12121                                                                          | 804 |
| A0A0D0JPA7 | General secretion pathway protein GspD | RU10_01900                                     | <i>Pseudomonas fluorescens</i>                                                                            | 789 |
| A0A0D1M3D8 | General secretion pathway protein GspD | QV12_04285                                     | <i>Pseudomonas putida</i> ( <i>Arthrobacter siderocapsulatus</i> )                                        | 778 |
| A0A0D6BJ81 | General secretion pathway protein D    | POS17_3296                                     | <i>Pseudomonas</i> sp. Os17                                                                               | 795 |
| A0A0D6HCN3 | Pullulanase secretion envelope pulD    | pulD_2 ERS451415_02362                         | <i>Alcaligenes xylosoxydans xylosoxydans</i> ( <i>Achromobacter xylosoxidans</i> )                        | 870 |
| A0A0D6SZ03 | General secretion pathway protein D    | SZ55_1280                                      | <i>Pseudomonas</i> sp. FeS53a                                                                             | 779 |
| A0A0D9AZM5 | General secretion pathway protein GspD | UG46_13610                                     | <i>Pseudomonas fluorescens</i>                                                                            | 785 |
| A0A0E1E3K7 | General secretion pathway protein GspD | EY04_13335                                     | <i>Pseudomonas chlororaphis</i>                                                                           | 804 |
| A0A0F4XS74 | General secretion pathway protein GspD | VP02_06125                                     | <i>Pseudomonas kilonensis</i>                                                                             | 786 |
| A0A0F7Y9F6 | General secretion pathway protein D    | CCOS191_3101                                   | <i>Pseudomonas</i> sp. CCOS 191                                                                           | 788 |
| A0A0G3GFB5 | General secretion pathway protein GspD | VM99_17655                                     | <i>Pseudomonas chlororaphis</i>                                                                           | 788 |
| A0A0G6CGZ2 | General secretion pathway protein D    | xcpQ_3<br>PAERUG_E15_London_28_01_14_0984<br>5 | <i>Pseudomonas aeruginosa</i>                                                                             | 793 |
| A0A0H4VYT7 | Type II secretion system protein D     | xcpQ ACR54_00398                               | <i>Bordetella hinzii</i>                                                                                  | 863 |
| A0A0H5A2J7 | General secretion pathway protein GspD | AA957_02715                                    | <i>Pseudomonas trivialis</i>                                                                              | 773 |
| A0A0J8FUA2 | General secretion pathway protein GspD | ACR52_28075                                    | <i>Pseudomonas</i> sp. KG01                                                                               | 777 |
| A0A0K2IKX0 | General secretion pathway protein GspD | YH67_11380                                     | <i>Stenotrophomonas maltophilia</i> ( <i>Pseudomonas maltophilia</i> ) ( <i>Xanthomonas maltophilia</i> ) | 793 |
| A0A0L0R078 | General secretion pathway protein GspD | AFM18_25725                                    | <i>Achromobacter spanius</i>                                                                              | 801 |
| A0A0L6FQZ5 | General secretion pathway protein GspD | DA83_01980                                     | <i>Pseudomonas</i> sp. 250J                                                                               | 789 |
| A0A0L6IAY7 | General secretion pathway protein GspD | AKG08_12445                                    | <i>Achromobacter piechaudii</i>                                                                           | 791 |
| A0A0M1EYN9 | General secretion pathway protein GspD | ABW44_02845                                    | <i>Stenotrophomonas maltophilia</i> ( <i>Pseudomonas maltophilia</i> ) ( <i>Xanthomonas maltophilia</i> ) | 795 |
| A0A0M7JN61 | Pullulanase secretion envelope pulD    | pulD_1 ERS370013_04093                         | <i>Achromobacter</i> sp.                                                                                  | 795 |
| A0A0M7KEM6 | Pullulanase secretion envelope pulD    | pulD_2 ERS370000_04243                         | <i>Achromobacter</i> sp.                                                                                  | 785 |
| A0A0M7LN65 | Pullulanase secretion envelope pulD    | pulD_2 ERS370003_03896                         | <i>Achromobacter</i> sp.                                                                                  | 851 |
| A0A0M7LPW1 | Pullulanase secretion envelope pulD    | pulD_3 ERS369989_05095                         | <i>Achromobacter</i> sp.                                                                                  | 870 |
| A0A0M7MBM2 | Pullulanase secretion envelope pulD    | pulD_3 ERS369982_05011                         | <i>Achromobacter</i> sp.                                                                                  | 873 |
| A0A0M9GIU5 | Type II secretion system protein D     | PF66_01622                                     | <i>Pseudomonas fuscovaginae</i>                                                                           | 794 |
| A0A0N0GGN1 | General secretion pathway protein D    | ABJ99_0811                                     | <i>Pseudomonas syringae</i> pv. <i>cilantro</i>                                                           | 784 |
| A0A0N1JBQ3 | General secretion pathway protein D    | AC507_4306                                     | <i>Pseudomonas syringae</i> pv. <i>maculicola</i>                                                         | 784 |
| A0A0N9WN46 | Type II secretion system protein GspD  | AO356_24790                                    | <i>Pseudomonas fluorescens</i>                                                                            | 786 |
| A0A0P6S501 | General secretion pathway protein GspD | AK821_00955                                    | <i>Pseudomonas</i> sp. RIT-PI-r                                                                           | 789 |

|            |                                        |                                                                               |                                                                                  |     |
|------------|----------------------------------------|-------------------------------------------------------------------------------|----------------------------------------------------------------------------------|-----|
| A0A0P8Z9H9 | Type II secretion system protein GspD  | APR47_12375 APR48_12675<br>APR49_03360 APR50_04410<br>APR51_04535 APR52_11515 | Variovorax paradoxus                                                             | 807 |
| A0A0P9PT68 | Proteinral secretion pathway protein D | ALO82_04792                                                                   | Pseudomonas syringae pv. broussonetiae                                           | 841 |
| A0A0P9UCX9 | Proteinral secretion pathway protein D | ALO35_05651                                                                   | Pseudomonas amygdali pv. lachrymans<br>(Pseudomonas syringae pv. lachrymans)     | 977 |
| A0A0Q0DLS6 | Proteinral secretion pathway protein D | ALO56_05058                                                                   | Pseudomonas viridiflava                                                          | 850 |
| A0A0Q4NVZ4 | Type II secretion system protein GspD  | ASF04_16720                                                                   | Duganella sp. Leaf61                                                             | 781 |
| A0A0Q5CYY4 | Type II secretion system protein GspD  | ASF61_13865                                                                   | Duganella sp. Leaf126                                                            | 801 |
| A0A0Q6VKG2 | Type II secretion system protein GspD  | ASD15_20050                                                                   | Massilia sp. Root351                                                             | 733 |
| A0A0Q6YHJ1 | Type II secretion system protein GspD  | ASC85_12180                                                                   | Pseudomonas sp. Root401                                                          | 787 |
| A0A0Q8BLB5 | Type II secretion system protein GspD  | ASD71_22805                                                                   | Achromobacter sp. Root565                                                        | 788 |
| A0A0Q8K672 | Type II secretion system protein GspD  | ASD87_01890                                                                   | Achromobacter sp. Root170                                                        | 793 |
| A0A0Q8WQ22 | Type II secretion system protein GspD  | ASE30_15820                                                                   | Achromobacter sp. Root83                                                         | 790 |
| A0A0R0BGK9 | Type II secretion system protein GspD  | ARC23_07450                                                                   | Stenotrophomonas maltophilia (Pseudomonas maltophilia) (Xanthomonas maltophilia) | 793 |
| A0A0R0BW20 | Type II secretion system protein GspD  | ARC02_02985                                                                   | Stenotrophomonas maltophilia (Pseudomonas maltophilia) (Xanthomonas maltophilia) | 793 |
| A0A0R0DY42 | General secretion pathway protein GspD | ABB31_01270                                                                   | Stenotrophomonas pavanii                                                         | 793 |
| A0A0R3B3M6 | General secretion pathway protein GspD | TU80_09895                                                                    | Pseudomonas veronii                                                              | 767 |
| A0A0S1XVX2 | Type II secretion system protein GspD  | ASB57_02250                                                                   | Bordetella sp. N                                                                 | 884 |
| A0A0U1QDT3 | General secretion pathway protein GspD | YH64_12160                                                                    | Achromobacter sp. LC458                                                          | 804 |
| A0A0U5DE65 | General secretion pathway protein D    | BN1263230003                                                                  | Stenotrophomonas maltophilia (Pseudomonas maltophilia) (Xanthomonas maltophilia) | 793 |
| A0A0U5HQZ3 | General secretion pathway protein D    | BN1263210012                                                                  | Stenotrophomonas maltophilia (Pseudomonas maltophilia) (Xanthomonas maltophilia) | 793 |
| A0A0V2NE33 | Type II secretion system protein GspD  | AO896_15075                                                                   | Pseudomonas aeruginosa                                                           | 803 |
| A0A0W0IL03 | Type II secretion system protein GspD  | AO068_05570                                                                   | Pseudomonas sp. ICMP 3272                                                        | 778 |
| A0A0W0LVI2 | Type II secretion system protein GspD  | AO391_04340                                                                   | Pseudomonas marginalis ICMP 9505                                                 | 787 |
| A0A109XVN3 | Type II secretion system protein GspD  | AL504_06805                                                                   | Alcaligenes xylosoxydans xylosoxydans<br>(Achromobacter xylosoxydans)            | 873 |
| A0A126S3D1 | General secretion pathway protein D    | AWT69_002019                                                                  | Pseudomonas putida (Arthrobacter siderocapsulatus)                               | 789 |
| A0A143GFQ4 | General secretion pathway protein D    | AK972_2227                                                                    | Pseudomonas fluorescens                                                          | 769 |
| A0A149QGD8 | General secretion pathway protein GspD | AB839_11365                                                                   | Stenotrophomonas sp. DDT-1                                                       | 793 |
| A0A151QH77 | Type II secretion system protein GspD  | A0129_06315                                                                   | Limnobacter sp. CACIAM 66H1                                                      | 795 |
| A0A157Q1Y8 | General secretion pathway protein D    | gspD_1 SAMEA1982600_03098                                                     | Bordetella ansorpii                                                              | 879 |



|            |                                        |                           |                                                                                     |     |
|------------|----------------------------------------|---------------------------|-------------------------------------------------------------------------------------|-----|
| A0A157QKP7 | General secretion pathway protein D    | gspD_2 SAMEA1982600_03670 | Bordetella ansorpii                                                                 | 968 |
| A0A157QMY7 | General secretion pathway protein D    | gspD_3 SAMEA1982600_03781 | Bordetella ansorpii                                                                 | 959 |
| A0A157SF87 | General secretion pathway protein D    | gspD_1 SAMEA3906486_02305 | Bordetella ansorpii                                                                 | 939 |
| A0A157SLY4 | General secretion pathway protein D    | gspD_2 SAMEA3906486_03515 | Bordetella ansorpii                                                                 | 880 |
| A0A157SS67 | General secretion pathway protein D    | gspD_3 SAMEA3906486_04391 | Bordetella ansorpii                                                                 | 938 |
| A0A159ZS25 | Type II secretion system protein GspD  | TK06_03225                | Pseudomonas fluorescens                                                             | 787 |
| A0A162ULS7 | Type II secretion system protein GspD  | A3839_19555               | Achromobacter sp. AR476-2                                                           | 790 |
| A0A171KT29 | General secretion pathway protein GspD | AAV32_08345               | Kerstesia gyiorum                                                                   | 681 |
| A0A176NI69 | Type II secretion system protein GspD  | APS14_07145               | Pseudomonas thivervalensis                                                          | 788 |
| A0A176XW46 | Type II secretion system protein GspD  | A7J67_09675               | Alcaligenes xylosoxydans xylosoxydans<br>(Achromobacter xylosoxidans)               | 793 |
| A0A177XBA5 | Type II secretion system protein GspD  | AO064_10630               | Pseudomonas marginalis                                                              | 788 |
| A0A193G733 | Type II secretion system protein GspD  | BAU08_25875               | Bordetella bronchialis                                                              | 845 |
| A0A1A6XYF5 | Type II secretion system protein GspD  | A9J40_07525               | Stenotrophomonas maltophilia (Pseudomonas<br>maltophilia) (Xanthomonas maltophilia) | 793 |
| A0A1A9JFM5 | Type II secretion system protein GspD  | A8L59_14235               | Pseudomonas koreensis                                                               | 792 |
| A0A1B2RAX9 | General secretion pathway protein GspD | AKI39_24140               | Bordetella sp. H567                                                                 | 836 |
| A0A1B3D7I4 | Type II secretion system protein GspD  | A7317_10690               | Pseudomonas fluorescens                                                             | 781 |
| A0A1B5ENG7 | Pectic enzymes secretion protein OutD  | outD_3                    | Pseudomonas sp. 22 E 5                                                              | 766 |
| A0A1B5F4C9 | General secretion pathway protein D    | xcpQ                      | Pseudomonas sp. 22 E 5                                                              | 755 |
| A0A1C1W2W0 | Type II secretion system protein GspD  | BB029_15235               | Pseudomonas sp. S3E12                                                               | 774 |
| A0A1C1W6D3 | Type II secretion system protein GspD  | BBG20_18990               | Pseudomonas sp. S1E40                                                               | 776 |
| A0A1C3BLZ3 | Type II secretion system protein GspD  | A7P25_16740               | Alcaligenes xylosoxydans xylosoxydans<br>(Achromobacter xylosoxidans)               | 870 |
| A0A1C3GSR2 | General secretion pathway protein D    | xcpQ BN1864_LIB5394:03422 | Pseudomonas sp. 1 R 17                                                              | 777 |
| A0A1C3K587 | General secretion pathway protein D    | ODI_01971                 | Orrella dioscoreae                                                                  | 920 |
| A0A1C3K7J9 | General secretion pathway protein D    | ODI_02413                 | Orrella dioscoreae                                                                  | 958 |
| A0A1D2SK71 | Type II secretion system protein GspD  | ABS56_03715               | Lautropia sp. SCN 69-89                                                             | 841 |
| A0A1D2TNN0 | Type II secretion system protein GspD  | ABS55_01245               | Lautropia sp. SCN 70-15                                                             | 825 |
| A0A1E3ZI93 | Type II secretion system protein GspD  | ABS43_07135               | Bordetella sp. SCN 67-23                                                            | 813 |
| A0A1E4IE78 | Type II secretion system protein GspD  | ABS91_03755               | Thiobacillus sp. SCN 64-35                                                          | 672 |
| A0A1E4J5K5 | Type II secretion system protein GspD  | ABS94_07395               | Variovorax sp. SCN 67-85                                                            | 863 |
| A0A1E4W8M1 | Type II secretion system protein GspD  | A9G05_22375               | Pseudomonas sp. ENNP23                                                              | 778 |
| A0A1F3ZC24 | Type II secretion system protein GspD  | A2Z64_11360               | Betaproteobacteria bacterium<br>RIFCSPLOWO2_02_67_12                                | 693 |

|            |                                           |                     |                                                                                                           |     |
|------------|-------------------------------------------|---------------------|-----------------------------------------------------------------------------------------------------------|-----|
| A0A1H1Q8K2 | General secretion pathway protein D       | SAMN05216198_1412   | <i>Pseudomonas litoralis</i>                                                                              | 883 |
| A0A1H1RY05 | General secretion pathway protein D       | SAMN04490182_1465   | <i>Pseudomonas cedrina</i>                                                                                | 774 |
| A0A1H1W5M4 | General secretion pathway protein D       | SAMN05216579_2000   | <i>Pseudomonas granadensis</i>                                                                            | 795 |
| A0A1H1XF97 | General secretion pathway protein D       | SAMN05216585_4503   | <i>Pseudomonas chlororaphis</i>                                                                           | 805 |
| A0A1H1Z7Z0 | General secretion pathway protein D       | SAMN05216598_4892   | <i>Pseudomonas asplenii</i>                                                                               | 797 |
| A0A1H2M925 | General secretion pathway protein D       | SAMN04490181_1161   | <i>Pseudomonas brenneri</i>                                                                               | 766 |
| A0A1H2MHL8 | General secretion pathway protein D       | SAMN05216202_1625   | <i>Pseudomonas mucidolens</i>                                                                             | 775 |
| A0A1H2NPF6 | General secretion pathway protein D       | SAMN04490209_2712   | <i>Pseudomonas rhodesiae</i>                                                                              | 772 |
| A0A1H3FSP3 | General secretion pathway protein D       | SAMN05216247_102245 | <i>Pseudomonas salomonii</i>                                                                              | 782 |
| A0A1I1A800 | General secretion pathway protein D       | SAMN05216248_104411 | <i>Pseudomonas simiae</i>                                                                                 | 764 |
| A0A1I4SQT7 | General secretion pathway protein D       | SAMN05444064_12524  | <i>Pseudomonas syringae</i>                                                                               | 781 |
| A0A1I6JFZ8 | Type II secretion system protein D (GspD) | SAMN04487782_0279   | <i>Stenotrophomonas maltophilia</i> ( <i>Pseudomonas maltophilia</i> ) ( <i>Xanthomonas maltophilia</i> ) | 791 |
| A0A1K1LTE7 | General secretion pathway protein D       | SAMN03159439_00179  | <i>Pseudomonas</i> sp. NFACC04-2                                                                          | 787 |
| A0A1K1STL7 | General secretion pathway protein D       | SAMN05660640_04693  | <i>Pseudomonas</i> sp. NFACC16-2                                                                          | 786 |
| A0A1K1UMP6 | General secretion pathway protein D       | SAMN03159479_01015  | <i>Pseudomonas</i> sp. NFPP09                                                                             | 794 |
| A0A1K1Y0U0 | General secretion pathway protein D       | SAMN03159442_02055  | <i>Pseudomonas</i> sp. NFACC47-1                                                                          | 786 |
| A0A1M5NUK2 | Type II secretion system protein D (GspD) | SAMN04488135_101622 | <i>Candidimonas bauzanensis</i>                                                                           | 822 |
| A0A1M6BEM3 | General secretion pathway protein D       | SAMN04488135_12512  | <i>Candidimonas bauzanensis</i>                                                                           | 915 |
| A0A1N7G1L0 | General secretion pathway protein D       | SAMN05216504_4016   | <i>Pseudomonas</i> sp. A214                                                                               | 784 |
| A0A1N7RCB4 | Type II secretion system protein D (GspD) | SAMN05428937_5431   | <i>Achromobacter</i> sp. MFA1 R4                                                                          | 817 |
| A0A1Q7IQ90 | Type II secretion system protein GspD     | AUH79_06990         | <i>Betaproteobacteria bacterium</i><br>13_1_40CM_4_64_4                                                   | 695 |
| A0A1Q7VHG1 | Type II secretion system protein GspD     | AUG50_07380         | <i>Betaproteobacteria bacterium</i><br>13_1_20CM_3_63_8                                                   | 700 |
| A0A1Q8EQJ7 | Type II secretion system protein GspD     | BTN82_13355         | <i>Pseudomonas chlororaphis</i>                                                                           | 804 |
| A0A1Q9WSE8 | Type II secretion system protein GspD     | BVK87_27570         | <i>Achromobacter denitrificans</i> ( <i>Alcaligenes denitrificans</i> )                                   | 870 |
| A0A1R0G9T9 | Type II secretion system protein GspD     | AU074_07535         | <i>Pseudomonas</i> sp. ATCC PTA-122608                                                                    | 768 |
| A0A1S2BR35 | Type II secretion system protein GspD     | BB780_09115         | <i>Stenotrophomonas maltophilia</i> ( <i>Pseudomonas maltophilia</i> ) ( <i>Xanthomonas maltophilia</i> ) | 793 |
| A0A1S2V223 | Type II secretion system protein GspD     | BFL40_14315         | <i>Pseudomonas costantinii</i>                                                                            | 773 |
| A0A1T1HJC2 | Type II secretion system protein GspD     | MF4836_32330        | <i>Pseudomonas</i> sp. MF4836                                                                             | 788 |
| A6GLP8     | Type II and III secretion system protein  | LMED105_05252       | <i>Limnobacter</i> sp. MED105                                                                             | 807 |
| A9IRR4     | General secretion pathway protein D       | gspD Bpet2865       | <i>Bordetella petrii</i> (strain ATCC BAA-461 / DSM 12804 / CCUG 43448)                                   | 862 |

|            |                                                                              |                       |                                                    |     |
|------------|------------------------------------------------------------------------------|-----------------------|----------------------------------------------------|-----|
| B4SL34     | General secretion pathway protein D                                          | Smal_2211             | Stenotrophomonas maltophilia (strain R551-3)       | 793 |
| C3K8J8     | Putative type II secretion pathway protein D                                 | PFLU_2423             | Pseudomonas fluorescens (strain SBW25)             | 770 |
| E3HR19     | General secretion pathway protein D                                          | gspD AXYL_02659       | Achromobacter xylooxidans (strain A8)              | 790 |
| F4GSU2     | General secretion pathway protein D                                          | PT7_1144              | Pusillimonas sp. (strain T7-7)                     | 792 |
| G0K2F2     | General secretion pathway protein D                                          | BurJV3_2260           | Stenotrophomonas maltophilia JV3                   | 793 |
| H0F1U5     | General secretion pathway protein D                                          | KYC_03657             | Achromobacter arsenitoxydans SY8                   | 794 |
| J0UNT9     | General secretion pathway protein D                                          | QWA_10806             | Alcaligenes faecalis subsp. faecalis NCIB 8687     | 770 |
| J1QM3      | General secretion pathway protein D                                          | A462_03524            | Pseudomonas sp. Ag1                                | 769 |
| J2MR24     | General secretion pathway protein D                                          | gspD PflQ2_3149       | Pseudomonas fluorescens Q2-87                      | 788 |
| J2R4M0     | General secretion pathway protein D                                          | PMI23_01086           | Pseudomonas sp. GM24                               | 788 |
| J2STL5     | General secretion pathway protein D                                          | PMI30_03322           | Pseudomonas sp. GM50                               | 791 |
| J2YH54     | Type II secretion protein, secretin HxcQ                                     | hxcQ Pchl3084_2689    | Pseudomonas chlororaphis subsp. aureofaciens 30-84 | 803 |
| J4QK19     | General secretion pathway protein D                                          | QWC_27491             | Achromobacter piechaudii HLE                       | 792 |
| K0WKNO     | General secretion pathway protein D                                          | I1A_003007            | Pseudomonas fluorescens R124                       | 792 |
| L9PM96     | General secretion pathway protein D                                          | gspD Jab_1c05580      | Janthinobacterium sp. HH01                         | 750 |
| Q11B24     | Putative type II secretion system protein XcpQ-2 putative signal peptide     | PSEEN2332             | Pseudomonas entomophila (strain L48)               | 787 |
| Q2KZP0     | General secretion pathway protein D                                          | gspD BAV0333          | Bordetella avium (strain 197N)                     | 860 |
| U1ZMJ4     | General secretion pathway protein D                                          | N879_08325            | Alcaligenes sp. EGD-AK7                            | 770 |
| U3HJZ0     | Uncharacterized protein                                                      | L682_31615            | Pseudomonas alcaligenes OT 69                      | 793 |
| U6ZLY6     | General secretion pathway protein D                                          | P308_14265            | Pseudomonas sp. CMAA1215                           | 797 |
| V8R6M2     | General secretion pathway protein D                                          | PMO01_14565           | Pseudomonas moraviensis R28-S                      | 795 |
| W2DHG2     | General secretion pathway protein D                                          | H096_22773            | Pseudomonas sp. FH1                                | 767 |
| W8X971     | General secretion pathway protein D                                          | BN940_09271           | Castellaniella defragrans 65Phen                   | 780 |
| A0A063BJ98 | General secretion pathway protein D                                          | LIG30_1917            | Burkholderia sp. lig30                             | 752 |
| A0A063BN64 | General secretion pathway protein D                                          | LIG30_0843            | Burkholderia sp. lig30                             | 774 |
| A0A069IF75 | General secretion pathway protein GspD                                       | CF70_032030           | Cupriavidus sp. SK-3                               | 810 |
| A0A069P5E9 | General secretion pathway protein GspD                                       | BG57_24715            | Caballeronia grimmiae                              | 814 |
| A0A069PIT2 | General secretion pathway protein D (General secretion pathway protein GspD) | BG61_30030 BGLT_05776 | Caballeronia glathei                               | 789 |
| A0A071MDU6 | General secretion pathway protein GspD                                       | DT99_14655            | Burkholderia cenocepacia                           | 779 |
| A0A081V8L2 | General secretion pathway protein GspD                                       | HR51_24110            | Burkholderia cepacia (Pseudomonas cepacia)         | 775 |
| A0A084DNI1 | General secretion pathway protein GspD                                       | GQ57_03620            | Burkholderia sp. MSh2                              | 772 |
| A0A086W5K9 | General secretion pathway protein GspD                                       | JN27_21525            | Massilia sp. BSC265                                | 761 |

|            |                                                                             |                           |                                                                                 |     |
|------------|-----------------------------------------------------------------------------|---------------------------|---------------------------------------------------------------------------------|-----|
| A0A087NMV8 | General secretion pathway protein GspD                                      | JM78_28255                | Burkholderia pyrrocinia (Pseudomonas pyrrocinia)                                | 774 |
| A0A088U867 | Type II secretion system protein D                                          | gspD DM39_3336            | Burkholderia cenocepacia                                                        | 770 |
| A0A088XJR2 | Type II secretion system protein D                                          | gspD DM82_3164            | Burkholderia oklahomensis                                                       | 750 |
| A0A095GFW6 | General secretion pathway protein GspD (Type II secretion system protein D) | gspD DM48_4199 XF14_21725 | Burkholderia gladioli (Pseudomonas marginata) (Phytomonas marginata)            | 787 |
| A0A096YK72 | Type II secretion system protein D                                          | gspD DR63_1786            | Burkholderia thailandensis (strain ATCC 700388 / DSM 13276 / CIP 106301 / E264) | 751 |
| A0A0A1FCS5 | General secretion pathway protein D                                         | LT85_3113                 | Collimonas arenae                                                               | 740 |
| A0A0A1H8R9 | General secretory pathway component, cryptic                                | E1O_25480                 | Burkholderiales bacterium GJ-E10                                                | 751 |
| A0A0A6QG77 | General secretion pathway protein GspD                                      | NH14_04980                | Paraburkholderia sacchari                                                       | 789 |
| A0A0B1Y375 | General secretion pathway protein GspD                                      | PI87_20240                | Ralstonia sp. A12                                                               | 802 |
| A0A0B1Y5A4 | General secretion pathway protein GspD                                      | PI86_15020                | Burkholderia sp. A9                                                             | 770 |
| A0A0B6RQW4 | General secretion pathway protein D                                         | gspD BGL_1c00350          | Burkholderia glumae PG1                                                         | 782 |
| A0A0C1YAC8 | General secretion pathway protein GspD                                      | TSA66_22485               | Herbaspirillum sp. TSA66                                                        | 731 |
| A0A0C1Z0Y4 | General secretion pathway protein D                                         | BurMR1_1005               | Burkholderia sp. MR1                                                            | 821 |
| A0A0C4YKZ2 | General secretion pathway protein D                                         | RR42_m3966                | Cupriavidus basilensis                                                          | 809 |
| A0A0D0HCB8 | GspD protein                                                                | gspD KY49_5459            | Burkholderia sp. MSHR3999                                                       | 767 |
| A0A0D5AKN2 | General secretion pathway protein GspD                                      | TK49_01520                | Ralstonia mannitolilytica                                                       | 805 |
| A0A0D5DW12 | General secretion pathway protein GspD                                      | DM57_1547                 | Burkholderia mallei (Pseudomonas mallei)                                        | 757 |
| A0A0D5LEX6 | Type II secretion system protein D                                          | gspD BW21_192             | Burkholderia sp. 2002721687                                                     | 756 |
| A0A0D5VBQ1 | Type II secretion system protein D                                          | gspD OI25_1505            | Paraburkholderia fungorum                                                       | 790 |
| A0A0D8E0F8 | General secretion pathway protein GspD                                      | PL79_12370                | Burkholderia sp. USM B20                                                        | 780 |
| A0A0E4AHZ0 | General secretion pathway protein GspD                                      | XM57_04550                | Burkholderia cepacia (Pseudomonas cepacia)                                      | 780 |
| A0A0E9MAZ7 | Type II secretion system protein D                                          | xcpQ OYT1_02653           | Ferriphaselus amnicola                                                          | 704 |
| A0A0F0D9T0 | General secretion pathway protein GspD                                      | UB44_25645                | Burkholderiaceae bacterium 26                                                   | 806 |
| A0A0F0FPS0 | General secretion pathway protein GspD                                      | UB46_21665                | Burkholderiaceae bacterium 16                                                   | 804 |
| A0A0F5K3C7 | Uncharacterized protein                                                     | WM40_06110                | Paraburkholderia andropogonis                                                   | 847 |
| A0A0G3WNG5 | General secretion pathway protein GspD                                      | ABD05_06350               | Burkholderia pyrrocinia (Pseudomonas pyrrocinia)                                | 769 |
| A0A0G3YX92 | General secretion pathway protein GspD                                      | NL30_19190                | Burkholderia contaminans                                                        | 780 |
| A0A0H2XM31 | Type II secretion system gspD                                               | Bcen_0008                 | Burkholderia cenocepacia (strain AU 1054)                                       | 774 |
| A0A0J1CJ21 | General secretion pathway protein GspD                                      | EOS_40010                 | Caballeronia glathei PML1(12)                                                   | 696 |
| A0A0J1CRE9 | General secretion pathway protein GspD                                      | EOS_26885                 | Caballeronia glathei PML1(12)                                                   | 772 |
| A0A0J1CWB5 | General secretion pathway protein GspD                                      | EOS_17900                 | Caballeronia glathei PML1(12)                                                   | 800 |

|            |                                                                                 |                                                                                                             |                                                                               |     |
|------------|---------------------------------------------------------------------------------|-------------------------------------------------------------------------------------------------------------|-------------------------------------------------------------------------------|-----|
| A0A0J5WTB1 | General secretion pathway protein GspD                                          | VL15_19650                                                                                                  | Burkholderia cepacia (Pseudomonas cepacia)                                    | 772 |
| A0A0J5YRJ7 | General secretion pathway protein GspD                                          | VL00_17175                                                                                                  | Burkholderia lata (strain ATCC 17760 / LMG 22485 / NCIMB 9086 / R18194 / 383) | 781 |
| A0A0J7JRJ5 | General secretion pathway protein D                                             | BPMI_04050c                                                                                                 | Candidatus Burkholderia pumila                                                | 799 |
| A0A0J9DT65 | General secretion pathway protein GspD                                          | AC240_11490                                                                                                 | Ralstonia sp. MD27                                                            | 804 |
| A0A0K1K0W9 | General secretion pathway protein GspD                                          | ACZ75_17505                                                                                                 | Massilia sp. NR 4-1                                                           | 747 |
| A0A0K9JX73 | General secretion pathway protein D                                             | BHUM_05170c                                                                                                 | Candidatus Burkholderia humilis                                               | 631 |
| A0A0L0MFJ4 | General secretion pathway protein D                                             | BVER_04404c                                                                                                 | Candidatus Burkholderia verschuerenii                                         | 634 |
| A0A0L1L1D3 | General secretion pathway protein D                                             | BRCH_00612c                                                                                                 | Candidatus Burkholderia brachyanthoides                                       | 798 |
| A0A0M3TW93 | General secretion pathway protein GspD                                          | AC233_17835                                                                                                 | Burkholderia sp. HB1                                                          | 781 |
| A0A0N0ICS6 | General secretion pathway protein GspD                                          | ADM96_36025                                                                                                 | Burkholderia sp. ST111                                                        | 776 |
| A0A0N0XI54 | Type II secretion system protein D                                              | xcpQ WG78_18075                                                                                             | Amantichitinum ursilacus                                                      | 759 |
| A0A0P0R6A3 | General secretion pathway protein D                                             | K788_0003580                                                                                                | Paraburkholderia caribensis MBA4                                              | 787 |
| A0A0Q9P8R9 | Type II secretion system protein GspD                                           | ASG75_01885                                                                                                 | Rhodanobacter sp. Soil772                                                     | 696 |
| A0A0R0LGW8 | Putative type II secretion system protein D                                     | gspD FERRO_12660                                                                                            | Ferrovum sp. JA12                                                             | 762 |
| A0A0S4TXW8 | General secretion pathway protein D<br>(General secretion pathway protein GspD) | RSP799_01125 RUN39_v1_970014                                                                                | Ralstonia solanacearum (Pseudomonas solanacearum)                             | 806 |
| A0A0S4VNS7 | General secretion pathway protein D (Type II secretion system protein GspD)     | AC251_01655 RD1301_v1_1220004<br>RUN1744_v1_40027<br>RUN1985_v1_190047<br>TD1301_v1_1960004 TF3108_v1_50040 | Ralstonia solanacearum (Pseudomonas solanacearum)                             | 806 |
| A0A0U4DQR1 | Type II secretion system protein GspD                                           | P350_01830                                                                                                  | Burkholderia cepacia JBK9                                                     | 780 |
| A0A102ESW1 | Type II secretion system protein GspD                                           | WS45_12450                                                                                                  | Burkholderia sp. RF2-non_BP3                                                  | 775 |
| A0A102K0H7 | Type II secretion system protein GspD                                           | WI38_07810                                                                                                  | Burkholderia ubonensis                                                        | 774 |
| A0A103E227 | Type II secretion system protein GspD                                           | WS67_13390                                                                                                  | Burkholderia sp. TSV85                                                        | 773 |
| A0A103FK05 | Type II secretion system protein GspD                                           | WS71_04580                                                                                                  | Burkholderia sp. BDU8                                                         | 756 |
| A0A103GHS0 | Type II secretion system protein GspD                                           | WJ03_15765                                                                                                  | Burkholderia vietnamiensis                                                    | 775 |
| A0A103QW14 | Type II secretion system protein GspD                                           | WJ33_36065                                                                                                  | Burkholderia ubonensis                                                        | 774 |
| A0A104GV72 | Type II secretion system protein GspD                                           | WL80_31175                                                                                                  | Burkholderia ubonensis                                                        | 770 |
| A0A104MR15 | Type II secretion system protein GspD                                           | WJ63_19920                                                                                                  | Burkholderia pyrrocinia (Pseudomonas pyrrocinia)                              | 772 |
| A0A105ZFC8 | Type II secretion system protein GspD                                           | WK95_00845                                                                                                  | Burkholderia ubonensis                                                        | 778 |
| A0A108D5P9 | Type II secretion system protein GspD                                           | WM16_28050                                                                                                  | Burkholderia ubonensis                                                        | 783 |
| A0A109E7G0 | Type II secretion system protein GspD                                           | AS149_11280                                                                                                 | Burkholderia cenocepacia                                                      | 781 |
| A0A118CPQ7 | Type II secretion system protein GspD                                           | WS61_19300                                                                                                  | Burkholderia sp. ABCPW 11                                                     | 780 |
| A0A118DU30 | Type II secretion system protein GspD                                           | WS68_07880                                                                                                  | Burkholderia sp. TSV86                                                        | 766 |

|            |                                          |                    |                                                                               |     |
|------------|------------------------------------------|--------------------|-------------------------------------------------------------------------------|-----|
| A0A118G1A7 | Type II secretion system protein GspD    | WS75_27175         | Burkholderia sp. FL-7-2-10-S1-D7                                              | 774 |
| A0A119AM87 | Type II secretion system protein GspD    | WT27_17140         | Burkholderia territorii                                                       | 775 |
| A0A119DI96 | Type II secretion system protein GspD    | WT32_26090         | Burkholderia anthina                                                          | 780 |
| A0A124PE77 | Type II secretion system protein GspD    | WS70_09535         | Burkholderia sp. BDU6                                                         | 758 |
| A0A124SQE9 | Type II secretion system protein GspD    | WS90_04770         | Burkholderia cepacia (Pseudomonas cepacia)                                    | 776 |
| A0A127QPV0 | Type II secretion system protein D       | gspD CAter282_4155 | Collimonas arenae                                                             | 764 |
| A0A132CUV2 | Type II secretion system protein GspD    | WS66_09080         | Burkholderia sp. LA-2-3-30-S1-D2                                              | 774 |
| A0A132HA60 | Type II secretion system protein D       | xcpQ AU374_04685   | Cupriavidus metallidurans                                                     | 783 |
| A0A142JDW9 | Type II secretion system protein GspD    | A2G96_00140        | Cupriavidus nantongensis                                                      | 832 |
| A0A149PXE0 | Type II secretion system protein GspD    | CI15_05990         | Paraburkholderia monticola                                                    | 794 |
| A0A149QEE2 | Type II secretion system protein GspD    | CR51_24505         | Caballeronia megalochromosomata                                               | 808 |
| A0A149VTF1 | Type II secretion system protein D       | xcpQ FV185_04500   | Ferrovum sp. PN-J185                                                          | 770 |
| A0A157Z2E6 | General secretory pathway protein D      | AWB75_00085        | Burkholderia catudaia                                                         | 795 |
| A0A157Z3F5 | Type II and III secretion system protein | AWB77_00173        | Burkholderia fortuita                                                         | 796 |
| A0A157Z9T6 | General secretory pathway protein D      | AWB78_00299        | Burkholderia calidae                                                          | 791 |
| A0A157Z9Z9 | Type II and III secretion system protein | AWB79_00569        | Burkholderia hypogeia                                                         | 805 |
| A0A157ZAM6 | Type II and III secretion system protein | AWB81_00126        | Burkholderia arationis                                                        | 797 |
| A0A157ZFH6 | Type II and III secretion system protein | AWB76_00596        | Burkholderia temeraria                                                        | 796 |
| A0A158A042 | General secretion pathway protein D      | AWB80_01570        | Burkholderia pedi                                                             | 789 |
| A0A158A1I2 | General secretion pathway protein D      | AWB82_01559        | Burkholderia glebae                                                           | 796 |
| A0A158DCA2 | Type II and III secretion system protein | AWB83_05313        | Burkholderia pterochthonis                                                    | 793 |
| A0A158FDR4 | General secretion pathway protein D      | AWB64_01119        | Caballeronia sordidicola                                                      | 817 |
| A0A158FFP5 | Type II and III secretion system protein | AWB73_01048        | Burkholderia turbans                                                          | 801 |
| A0A158H7Q6 | General secretion pathway protein D      | AWB69_04029        | Caballeronia udeis                                                            | 807 |
| A0A158HB52 | General secretory pathway protein D      | AWB74_01639        | Burkholderia arvi                                                             | 794 |
| A0A158HWP2 | General secretion pathway protein D      | AWB71_02685        | Burkholderia peredens                                                         | 789 |
| A0A161HPD4 | Type II secretion system protein GspD    | AYM40_20250        | Burkholderia sp. OLGA172                                                      | 781 |
| A0A192A0V5 | Type II secretion system protein GspD    | A9Y76_16580        | Ralstonia insidiosa                                                           | 804 |
| A0A1A5X6X5 | Type II secretion system protein GspD    | A6456_00365        | Paraburkholderia tropica                                                      | 778 |
| A0A1A9NDG3 | Type II secretion system protein GspD    | A6V37_01330        | Paraburkholderia ginsengiterrae                                               | 794 |
| A0A1B4HPG3 | Type II secretion system protein GspD    | WJ16_00320         | Burkholderia metallica                                                        | 781 |
| A0A1B4I7S8 | Type II secretion system protein GspD    | WJ23_00445         | Burkholderia lata (strain ATCC 17760 / LMG 22485 / NCIMB 9086 / R18194 / 383) | 776 |
| A0A1B4LEH2 | Type II secretion system protein GspD    | WJ35_11045         | Burkholderia ubonensis                                                        | 777 |

|            |                                             |                      |                                                        |     |
|------------|---------------------------------------------|----------------------|--------------------------------------------------------|-----|
| A0A1B4MPX7 | Type II secretion system protein GspD       | WK22_00280           | Burkholderia multivorans                               | 769 |
| A0A1B4NP57 | Type II secretion system protein GspD       | WK25_02370           | Burkholderia latens                                    | 773 |
| A0A1B4PMP4 | Type II secretion system protein GspD       | WT26_03675           | Burkholderia cepacia (Pseudomonas cepacia)             | 777 |
| A0A1C0XHF7 | Type II secretion system protein GspD       | BEK67_16125          | Ralstonia pickettii (Burkholderia pickettii)           | 805 |
| A0A1C3VZJ8 | Type II secretion system protein D (GspD)   | GA0116996_11428      | Cupriavidus alkaliphilus                               | 829 |
| A0A1D2SAK9 | Type II secretion system protein GspD       | ABS45_03620          | Comamonas sp. SCN 65-56                                | 773 |
| A0A1D7ZDE3 | Type II secretion system protein GspD       | BBJ41_09900          | Burkholderia stabilis                                  | 776 |
| A0A1D9H300 | Type II secretion system protein GspD       | BKK79_12070          | Cupriavidus sp. USMAA2-4                               | 790 |
| A0A1E4G0H5 | Type II secretion system protein GspD       | ABS69_08980          | Nitrosomonadales bacterium SCN 54-20                   | 789 |
| A0A1E4G548 | Type II secretion system protein GspD       | ABS69_07855          | Nitrosomonadales bacterium SCN 54-20                   | 784 |
| A0A1E4NAZ5 | Type II secretion system protein GspD       | ABT21_11680          | Thiobacillus sp. SCN 65-179                            | 671 |
| A0A1E7UPM2 | Putative type II secretion system protein D | gspD JAB1_23610      | Janthinobacterium sp. MP5059B                          | 749 |
| A0A1E7W3V9 | Putative type II secretion system protein D | gspD JAB8_21620      | Janthinobacterium sp. HH106                            | 743 |
| A0A1E7X632 | Putative type II secretion system protein D | gspD DUPY_08400      | Duganella phyllosphaerae                               | 783 |
| A0A1E8PRU2 | Type II secretion system protein GspD       | BA896_007280         | Janthinobacterium lividum                              | 750 |
| A0A1F4B2T0 | Type II secretion system protein GspD       | A3163_10795          | Betaproteobacteria bacterium RIFCSPLOWO2_02_FULL_66_14 | 652 |
| A0A1H0YRT4 | General secretion pathway protein D         | SAMN05443245_0244    | Paraburkholderia fungorum                              | 784 |
| A0A1H1EGQ8 | Type II secretion system protein D (GspD)   | SAMN05216402_2660    | Nitrosospira multiformis                               | 793 |
| A0A1H1JHU5 | General secretion pathway protein D         | SAMN05443245_6444    | Paraburkholderia fungorum                              | 700 |
| A0A1H3XB62 | Type II secretion system protein D (GspD)   | SAMN05216411_103131  | Nitrosospira multiformis                               | 789 |
| A0A1H7EFY3 | General secretion pathway protein D         | SAMN05216550_12252   | Paraburkholderia tropica                               | 705 |
| A0A1H8HGX1 | Type II secretion system protein D (GspD)   | SAMN05216404_105134  | Nitrosospira multiformis                               | 789 |
| A0A1H9Z4E9 | Type II secretion system protein D (GspD)   | SAMN05216412_101495  | Nitrosospira multiformis                               | 789 |
| A0A1I7FRR8 | Type II secretion system protein D (GspD)   | SAMN05216417_102135  | Nitrosospira multiformis                               | 783 |
| A0A1I9YIP7 | Type II secretion system protein GspD       | BJG93_12800          | Paraburkholderia spreintiae WSM5005                    | 798 |
| A0A1J9NJQ0 | Type II secretion system protein GspD       | BFF94_15655          | Burkholderia sp. DNA89                                 | 767 |
| A0A1K1S5R5 | Type II secretion system protein D (GspD)   | SAMN03159384_05144   | Burkholderia sp. NFACC33-1                             | 771 |
| A0A1L6HS93 | Type II secretion system protein GspD       | BTO02_00690          | Paraburkholderia sp. SOS3                              | 815 |
| A0A1L9GMW0 | Type II secretion system protein GspD       | AOC28_06765          | Polynucleobacter sp. MWH-Adler-W8                      | 756 |
| A0A1M6LLH1 | General secretion pathway protein D         | SAMN05192548_1005194 | Paraburkholderia terricola                             | 788 |
| A0A1N6EHW9 | General secretion pathway protein D         | SAMN05444168_0662    | Paraburkholderia phenazinium                           | 795 |
| A0A1N6GLF9 | General secretion pathway protein D         | SAMN05444172_0078    | Burkholderia sp. GAS332                                | 797 |
| A0A1N6GQD3 | Type II secretion system protein D (GspD)   | SAMN05444165_0903    | Paraburkholderia phenazinium                           | 791 |

|            |                                                               |                       |                                                                                                                                  |     |
|------------|---------------------------------------------------------------|-----------------------|----------------------------------------------------------------------------------------------------------------------------------|-----|
| A0A1N6L735 | General secretion pathway protein D                           | SAMN05444165_6366     | Paraburkholderia phenazinium                                                                                                     | 784 |
| A0A1N7RSR5 | General secretion pathway protein D                           | BN2475_140037         | Paraburkholderia ribeironis                                                                                                      | 790 |
| A0A1N7S437 | General secretion pathway protein D                           | BN2475_340092         | Paraburkholderia ribeironis                                                                                                      | 782 |
| A0A1N7SQW3 | General secretion pathway protein D                           | BN2476_700085         | Paraburkholderia piptadeniae                                                                                                     | 812 |
| A0A1P8FK66 | Type II secretion system protein GspD                         | BW117_12455           | Betaproteobacteria bacterium GR16-43                                                                                             | 698 |
| A0A1Q3VJX3 | Type II secretion system protein GspD                         | BGO50_07150           | Rhodanobacter sp. 67-28                                                                                                          | 699 |
| A0A1Q3YKD1 | Type II secretion system protein GspD                         | BGO72_21110           | Burkholderiales bacterium 70-64                                                                                                  | 781 |
| A0A1Q4LKZ6 | Type II secretion system protein GspD                         | BH759_18915           | Ralstonia solanacearum (Pseudomonas solanacearum)                                                                                | 810 |
| A0A1Q8IRV7 | Type II secretion system protein GspD                         | BTH42_23220           | Burkholderia sp. SRS-W-2-2016                                                                                                    | 768 |
| A0A1R1J469 | Type II secretion system protein GspD                         | BW685_30385           | Burkholderia ubonensis                                                                                                           | 774 |
| A0A1R3W0C4 | General secretion pathway protein D                           | SAMN04487768_2127     | Burkholderia sp. b13                                                                                                             | 803 |
| B1T6A2     | General secretion pathway protein D                           | BamMEX5DRAFT_3318     | Burkholderia ambifaria MEX-5                                                                                                     | 775 |
| B2JJP0     | General secretion pathway protein D                           | Bphy_3070             | Paraburkholderia phymatum (strain DSM 17167 / CIP 108236 / LMG 21445 / STM815) (Burkholderia phymatum)                           | 787 |
| B2JXL4     | General secretion pathway protein D                           | Bphy_7395             | Paraburkholderia phymatum (strain DSM 17167 / CIP 108236 / LMG 21445 / STM815) (Burkholderia phymatum)                           | 717 |
| B2T7P2     | General secretion pathway protein D                           | Bphyt_3936            | Paraburkholderia phytofirmans (strain DSM 17436 / LMG 22146 / PsJN) (Burkholderia phytofirmans)                                  | 791 |
| B2UFF1     | General secretion pathway protein D                           | Rpic_3399             | Ralstonia pickettii (strain 12J)                                                                                                 | 807 |
| B3R7X2     | General Secretory Pathway protein D, type II secretion system | gspD RALTA_A2996      | Cupriavidus taiwanensis (strain DSM 17343 / BCRC 17206 / CIP 107171 / LMG 19424 / R1) (Ralstonia taiwanensis (strain LMG 19424)) | 831 |
| B5WD07     | General secretion pathway protein D                           | BH160DRAFT_0957       | Burkholderia sp. H160                                                                                                            | 792 |
| C5A834     | General secretory pathway protein D                           | bglu_1g00380          | Burkholderia glumae (strain BGR1)                                                                                                | 765 |
| D5CMQ3     | General secretion pathway protein D                           | Slit_0499             | Sideroxydans lithotrophicus (strain ES-1)                                                                                        | 690 |
| D5W742     | General secretion pathway protein D                           | BC1002_3143           | Burkholderia sp. (strain CCGE1002)                                                                                               | 811 |
| E1T3W0     | General secretion pathway protein D                           | BC1003_3488           | Burkholderia sp. (strain CCGE1003)                                                                                               | 782 |
| E5AKF9     | General secretion pathway protein D                           | RBRH_00782            | Paraburkholderia rhizoxinica (strain DSM 19002 / CIP 109453 / HKI 454) (Burkholderia rhizoxinica)                                | 847 |
| E7RWU0     | General secretion pathway protein D                           | gspD HMPREF0551_1152  | Lautropia mirabilis ATCC 51599                                                                                                   | 837 |
| G0EZE4     | General secretion pathway protein D                           | gspD CNE_1c34900      | Cupriavidus necator (strain ATCC 43291 / DSM 13513 / N-1) (Ralstonia eutropha)                                                   | 812 |
| G2JAB6     | General secretion pathway protein D                           | gspD CAGGBEG34_290009 | Candidatus Glomeribacter gigasporarum BEG34                                                                                      | 750 |



|        |                                                               |                       |                                                                                            |     |
|--------|---------------------------------------------------------------|-----------------------|--------------------------------------------------------------------------------------------|-----|
| G3A240 | General Secretory Pathway protein D, type II secretion system | gspD RALSY_20068      | Ralstonia syzygii R24                                                                      | 807 |
| G4MJT4 | General secretion pathway protein D                           | BKIR_c95_1647         | Candidatus Paraburkholderia kirkii UZHbot1                                                 | 798 |
| G8MB45 | Type II and III secretion system protein:NoIW-like protein    | noIW BYI23_A026910    | Burkholderia sp. YI23                                                                      | 803 |
| I4VMQ3 | Type II and III secretion system protein                      | UU9_12123             | Rhodanobacter fulvus Jip2                                                                  | 704 |
| I9W516 | General secretory pathway component, cryptic                  | MW7_2219              | Ralstonia sp. PBA                                                                          | 772 |
| K0DUB3 | General secretion pathway protein D                           | BUPH_03878            | Paraburkholderia phenoliruptrix BR3459a                                                    | 789 |
| K8R523 | General secretion pathway protein D                           | BURK_029230           | Burkholderia sp. SJ98                                                                      | 795 |
| K8RK33 | General secretion pathway protein D                           | BURK_011241           | Burkholderia sp. SJ98                                                                      | 685 |
| Q0BJR0 | General secretion pathway protein D                           | Bamb_0052             | Burkholderia ambifaria (strain ATCC BAA-244 / AMMD) (Burkholderia cepacia (strain AMMD))   | 777 |
| Q0K5W9 | General secretion pathway protein D                           | gspD H16_A3543        | Cupriavidus necator (strain ATCC 17699 / H16 / DSM 428 / Stanier 337) (Ralstonia eutropha) | 812 |
| Q13SK8 | Putative general secretory pathway protein D                  | Bxe_A4501             | Paraburkholderia xenovorans (strain LB400)                                                 | 814 |
| Q39L20 | Type II and III secretion system protein                      | Bcep18194_A3244       | Burkholderia lata (strain ATCC 17760 / LMG 22485 / NCIMB 9086 / R18194 / 383)              | 781 |
| Q46W94 | Type II and III secretion system protein:NoIW-like protein    | Reut_A3229            | Cupriavidus necator (strain JMP 134 / LMG 1197) (Ralstonia eutropha (strain JMP 134))      | 804 |
| Q5P193 | General secretory pathway protein D                           | gspD2 ebA4915         | Aromatoleum aromaticum (strain EbN1) (Azoarcus sp. (strain EbN1))                          | 719 |
| Q9F1Q1 | GspD                                                          | gspD                  | Burkholderia cepacia (Pseudomonas cepacia)                                                 | 783 |
| R4WYW7 | General secretion pathway protein D                           | gspD BRPE64_ACDS28070 | Burkholderia sp. RPE64                                                                     | 786 |
| U3QW29 | General secretion pathway protein D                           | N234_19810            | Ralstonia pickettii DTP0602                                                                | 816 |
|        |                                                               |                       |                                                                                            |     |

## Other Gammaproteobacteria

| Entry      | Protein names                                                                                     | Gene names         | Organism                                                           | Length |
|------------|---------------------------------------------------------------------------------------------------|--------------------|--------------------------------------------------------------------|--------|
| A0A0Q4T9N5 | Uncharacterized protein                                                                           | ASF15_05435        | Pseudomonas sp. Leaf83                                             | 639    |
| A0A191ZHS1 | Type II secretion system protein GspD                                                             | A9404_08570        | Halothiobacillus sp. LS2                                           | 730    |
| A0A084IQP0 | General secretion pathway protein D                                                               | C41B8_02802        | Salinisphaera hydrothermalis C41B8                                 | 716    |
| F7Q2Y0     | Type II secretion system protein D                                                                | xcpQ SSPSH_003278  | Salinisphaera shabanensis E1L3A                                    | 694    |
| A0A0X3TFJ5 | Type II secretion system protein GspD                                                             | AVO42_03890        | Thiomicrospira sp. XS5                                             | 710    |
| F6DD37     | General secretion pathway protein D                                                               | Thicy_1006         | Thioalkalimicrobium cyclicum (strain DSM 14477 / JCM 11371 / ALM1) | 694    |
| Q31J27     | Type II secretion pathway protein D                                                               | Tcr_0250           | Thiomicrospira crunogena (strain XCL-2)                            | 703    |
| A0A1C9W9Q5 | Type II secretion system protein D                                                                | pulD AUP74_02483   | Microbulbifer sp. CCB-MM1                                          | 656    |
| A0A111EJQ3 | General secretion pathway protein D                                                               | SAMN05660479_00686 | Microbulbifer thermotolerans                                       | 659    |
| A0A1M4UF42 | General secretion pathway protein D                                                               | SAMN04487965_0138  | Microbulbifer donghaiensis                                         | 659    |
| A0A1Q2M9Q1 | Type II secretion system protein GspD                                                             | Mag101_08220       | Microbulbifer agarilyticus                                         | 626    |
| A0YBE1     | Type II and III secretion system protein                                                          | GP2143_05455       | marine gamma proteobacterium HTCC2143                              | 630    |
| A0A0X3UAB3 | Type II secretion system protein GspD                                                             | AVO43_04015        | Microbulbifer sp. ZGT114                                           | 633    |
| A0A101LL87 | Uncharacterized protein                                                                           | AR540_07205        | Pseudomonas sp. EpS/L25                                            | 589    |
| A0A1A9K5R6 | Type II secretion system protein GspD                                                             | A9C11_01655        | Pseudomonas citronellolis                                          | 574    |
| A0A1I0UTP9 | General secretion pathway protein D                                                               | SAMN05216263_1261  | Pseudomonas otitidis                                               | 644    |
| A0A1N6N4K2 | Type II secretion system protein D (GspD)                                                         | SAMN05878282_10110 | Pseudomonas alcaligenes                                            | 616    |
| U3HHE1     | Uncharacterized protein                                                                           | L682_06885         | Pseudomonas alcaligenes OT 69                                      | 636    |
| A0A0B0H680 | Type II protein secretion system<br>GspDSCFGHIJKLMEO, subunit D                                   | gspD JV46_18860    | Solemya velum gill symbiont                                        | 650    |
| A0A095X3A9 | General secretion pathway protein D / Type II secretion outermembrane pore forming protein (PulD) | HRUBRA_00059       | Pseudohalaea rubra DSM 19751                                       | 674    |
| A0A0K0XXC2 | General secretion pathway protein GspD                                                            | WM2015_1895        | Wenzhouxiangella marina                                            | 638    |
| A0A127F9X3 | Uncharacterized protein                                                                           | ACG33_08940        | Steroidobacter denitrificans                                       | 700    |
| A0A165UCP7 | Type II secretion system protein GspD                                                             | A3709_14325        | Halioglobus sp. HI00S01                                            | 671    |
| A0A193LFF4 | Type II secretion system protein GspD                                                             | BA177_08185        | Woeseia oceani                                                     | 653    |
| A0A1B1YRZ8 | Uncharacterized protein                                                                           | PG2T_04540         | Immundisolibacter cernigliae                                       | 644    |
| A0A1E2UVV6 | Type II secretion system protein GspD                                                             | A3196_16225        | Candidatus Thiodiazotropha endoloripes                             | 528    |
| A0A1E2UXH9 | Type II secretion system protein GspD                                                             | A3197_14590        | Candidatus Thiodiazotropha endoloripes                             | 528    |
| A0A1E4KF15 | Type II secretion system protein GspD                                                             | ABS96_33695        | Xanthomonadaceae bacterium SCN 69-123                              | 697    |

|            |                                           |                    |                                                                                  |     |
|------------|-------------------------------------------|--------------------|----------------------------------------------------------------------------------|-----|
| A0A1M5KEQ8 | General secretion pathway protein D       | SAMN04488068_0529  | Hydrocarboniphaga daqingensis                                                    | 683 |
| A0A1Q6WCM3 | Type II secretion system protein GspD     | AUH10_11265        | Gammaproteobacteria bacterium 13_2_20CM_66_19                                    | 688 |
| D6Z6F6     | General secretion pathway protein D       | DaAHT2_2256        | Desulfurivibrio alkaliphilus (strain DSM 19089 / UNIQEM U267 / AHT2)             | 690 |
| I8I1J9     | Uncharacterized protein                   | WQQ_31680          | Hydrocarboniphaga effusa AP103                                                   | 707 |
| A0A0S2KFE7 | General secretion pathway protein GspD    | PS2015_2398        | Pseudohongiella spirulinae                                                       | 652 |
| A0A1D2QSK8 | Type II secretion system protein GspD     | AB835_03055        | Candidatus Endobugula sertula (Bugula neritina bacterial symbiont)               | 652 |
| A0A1E8CG37 | Type II secretion system protein GspD     | PHACT_15425        | Pseudohongiella acticola                                                         | 668 |
| A0Z790     | Helix-turn-helix, AraC type               | MGP2080_15389      | marine gamma proteobacterium HTCC2080                                            | 696 |
| A4A5J7     | General secretion pathway protein D       | KT71_10582         | Congregibacter litoralis KT71                                                    | 696 |
| B3PF18     | General secretion pathway protein D       | gspD CJA_3332      | Cellvibrio japonicus (strain Ueda107) (Pseudomonas fluorescens subsp. cellulosa) | 681 |
| B8KIZ6     | General secretion pathway protein D       | gspD_1 NOR53_1392  | gamma proteobacterium NOR5-3                                                     | 682 |
| B8KQM8     | General secretion pathway protein D       | gspD_1 NOR51B_2071 | Luminiphilus sylvensis NOR5-1B                                                   | 682 |
| C5BLN9     | General secretion pathway protein D       | gspD TERTU_0265    | Teredinibacter turnerae (strain ATCC 39867 / T7901)                              | 661 |
| E0XQJ4     | Type II secretory pathway, component puld |                    | uncultured gamma proteobacterium HF0010_05D02                                    | 666 |
| F3L1F7     | General secretion pathway protein D       | IMCC3088_1297      | gamma proteobacterium IMCC3088                                                   | 672 |
| F3LEQ6     | Helix-turn-helix, AraC type               | IMCC1989_2557      | gamma proteobacterium IMCC1989                                                   | 659 |
| H3NY31     | General secretion pathway protein D       | OMB55_00004720     | gamma proteobacterium HIMB55                                                     | 667 |
| I3IFG7     | General secretion pathway protein D       | gspD O59_000823    | Cellvibrio sp. BR                                                                | 685 |
| Q21EP4     | Type II and III secretion system protein  | Sde_3580           | Saccharophagus degradans (strain 2-40 / ATCC 43961 / DSM 17024)                  | 666 |
| R9S595     | General secretion pathway protein D       | M5M_12147          | Simiduia agarivorans (strain DSM 21679 / JCM 13881 / BCRC 17597 / SA1)           | 667 |
| A0A078M9X3 | General secretion pathway protein D       | xcpQ BN1049_00666  | Pseudomonas saudimassiliensis                                                    | 684 |
| A0A090BUC9 | General secretion pathway protein D       | THII_0589          | Thioploca ingrica                                                                | 635 |
| A0A0G3G3V5 | General secretion pathway protein GspD    | TVD_01695          | Thioalkalivibrio versutus                                                        | 639 |
| A0A0N7FNQ3 | General secretion pathway protein GspD    | AL038_10365        | Beggiatoa leptomitiformis                                                        | 690 |
| A0A0S8DUU2 | Type II secretion system protein GspD     | AMJ69_04370        | Gammaproteobacteria bacterium SG8_47                                             | 652 |
| A0A0T5YZ53 | Type II secretion system protein D        | Ga0074115_12422    | endosymbiont of Ridgeia piscesae                                                 | 659 |
| A0A0X8X6M5 | General secretion pathway protein D       | HH1059_269         | Halorhodospira halochloris (Ectothiorhodospira halochloris)                      | 618 |
| A0A110B1Z4 | General secretion pathway protein D       | HH1059_1615        | Halorhodospira halochloris (Ectothiorhodospira halochloris)                      | 670 |
| A0A126T8G0 | Type II secretion system protein GspD     | JT25_017850        | Methylomonas denitrificans                                                       | 635 |

|            |                                                                                 |                                        |                                                                                                          |     |
|------------|---------------------------------------------------------------------------------|----------------------------------------|----------------------------------------------------------------------------------------------------------|-----|
| A0A167A8X7 | General secretion pathway protein GspD                                          | ECTOBSL9_0810                          | Ectothiorhodospira sp. BSL-9                                                                             | 657 |
| A0A167GJA5 | General secretion pathway protein GspD                                          | I596_586                               | Dokdonella koreensis DS-123                                                                              | 685 |
| A0A177M6Y8 | Type II secretion system protein GspD                                           | A1332_03610                            | Methylomonas methanica                                                                                   | 635 |
| A0A1E2ZHX7 | Type II secretion system protein D                                              | xcpQ CODIS_09750                       | Candidatus Thiodiazotropha endolucinida                                                                  | 668 |
| A0A1E4K9H3 | Type II secretion system protein GspD                                           | ABS97_03415                            | Xanthomonadaceae bacterium SCN 69-320                                                                    | 691 |
| A0A1E4ZX66 | Type II secretion system protein GspD                                           | AB833_15375                            | Chromatiales bacterium (ex Bugula neritina AB1)                                                          | 980 |
| A0A1F9M555 | Type II secretion system protein GspD                                           | A2505_00330                            | Deltaproteobacteria bacterium RIFOXYD12_FULL_55_16                                                       | 671 |
| A0A1F9MC20 | Type II secretion system protein GspD                                           | A2511_12640                            | Deltaproteobacteria bacterium RIFOXYD12_FULL_50_9                                                        | 658 |
| A0A1H1MKV7 | General secretion pathway protein D                                             | SAMN05216198_0651                      | Pseudomonas litoralis                                                                                    | 683 |
| A0A1H1UC70 | General secretion pathway protein D                                             | SAMN05216421_2017                      | Pseudomonas xinjiangensis                                                                                | 692 |
| A0A1H1XP65 | General secretion pathway protein D                                             | SAMN05216271_3610                      | Pseudomonas sabulinigri                                                                                  | 679 |
| A0A1H2GBD0 | General secretion pathway protein D                                             | SAMN05216210_2188                      | Pseudomonas salegens                                                                                     | 679 |
| A0A1H6BGC6 | General secretion pathway protein D                                             | SAMN05216586_11120                     | Pseudomonas aestusnigri                                                                                  | 681 |
| A0A1H9Q0G9 | General secretion pathway protein D (Type II secretion system protein D (GspD)) | SAMN04487855_0771<br>SAMN05216589_0854 | Pseudomonas bauzanensis                                                                                  | 682 |
| A0A1Q4FA19 | Type II secretion system protein GspD                                           | BGP25_04365                            | Xanthomonadales bacterium 63-13                                                                          | 685 |
| A0A1S8DL22 | Type II secretion system protein GspD                                           | BXT89_03475                            | Pseudomonas pachastrellae                                                                                | 682 |
| A0A1T2L909 | Type II secretion system protein GspD                                           | BOW53_03500                            | Solemya velesiana gill symbiont                                                                          | 668 |
| A1WZM1     | General secretion pathway protein D                                             | Hhal_2370                              | Halorhodospira halophila (strain DSM 244 / SL1)<br>(Ectothiorhodospira halophila (strain DSM 244 / SL1)) | 670 |
| B5JVD5     | General secretion pathway protein D                                             | gspD GP5015_375                        | gamma proteobacterium HTCC5015                                                                           | 694 |
| B8GU41     | General secretion pathway protein D                                             | Tgr7_0225                              | Thioalkalivibrio sulfidiphilus (strain HL-EbGR7)                                                         | 655 |
| G0A6N9     | General secretion pathway protein D                                             | Metme_0902                             | Methylomonas methanica (strain MC09)                                                                     | 621 |
| G4E4N3     | General secretion pathway protein D                                             | ThisiDRAFT_1262                        | Thiorhodospira sibirica ATCC 700588                                                                      | 668 |
| I3CIS6     | General secretion pathway protein D                                             | BegalDRAFT_2678                        | Beggiatoa alba B18LD                                                                                     | 695 |
| L0E2F0     | General secretion pathway protein D                                             | xcpQ [H] TVNIR_3844                    | Thioalkalivibrio nitratireducens (strain DSM 14787 / UNIQEM 213 / ALEN2)                                 | 654 |
| Q0A5Z6     | General secretion pathway protein D                                             | Mlg_2401                               | Alkalilimnicola ehrlichii (strain ATCC BAA-1101 / DSM 17681 / MLHE-1)                                    | 673 |
| W0DIW0     | General secretion pathway protein D                                             | THITH_00140                            | Thioalkalivibrio paradoxus ARh 1                                                                         | 654 |
| W6LT80     | Putative general secretion pathway protein                                      | BN874_1620022                          | Candidatus Contendobacter odensis Run_B_J11                                                              | 699 |
| W6ME49     | Putative General secretion pathway protein D                                    | BN873_770026                           | Candidatus Competibacter denitrificans Run_A_D11                                                         | 768 |
| A0A0F6RB45 | General secretion pathway protein D                                             | TQ33_0264                              | Kangiella geojedonensis                                                                                  | 726 |
| A0A1B3B888 | General secretion pathway protein D                                             | KS2013_292                             | Kangiella sediminilitoris                                                                                | 723 |
| C7R8G0     | General secretion pathway protein D                                             | Kkor_2316                              | Kangiella koreensis (strain DSM 16069 / KCTC 12182 / SW-125)                                             | 708 |

|            |                                       |                     |                                       |     |
|------------|---------------------------------------|---------------------|---------------------------------------|-----|
| A0A0C4WQL0 | General secretion pathway protein D   | gspD Achr_36010     | Azotobacter chroococcum NCIMB 8003    | 640 |
| A0A0F7M5J4 | Type II secretion system protein D    | IMCC21906_01807     | Spongiibacter sp. IMCC21906           | 696 |
| A0A127M4E2 | Type II secretion system protein GspD | AZF00_07000         | Zhongshania aliphaticivorans          | 721 |
| A0A1G3CVS1 | Type II secretion system protein GspD | A2002_01850         | Pseudomonadales bacterium GWC1_66_9   | 640 |
| A0A1N6XJ91 | General secretion pathway protein D   | SAMN05421647_11457  | Marinobacterium stanieri              | 661 |
| A0A1R1LZ24 | Type II secretion system protein GspD | BGP75_14740         | Motiliproteus sp. MSK22-1             | 653 |
| A0A1R1M4X8 | Type II secretion system protein GspD | BGP75_10840         | Motiliproteus sp. MSK22-1             | 654 |
| S6GPI0     | General secretion pathway protein D   | OFPI_02970          | Osedax symbiont Rs2                   | 690 |
| A0YG33     | General secretion pathway protein D   | GP2143_02030        | marine gamma proteobacterium HTCC2143 | 689 |
| B7RSS9     | General secretion pathway protein D   | gspD_1 GPB2148_2888 | marine gamma proteobacterium HTCC2148 | 677 |

*Pseudomonas putida/fluorescens/syringae*

| Entry      | Protein names                             | Gene names          | Organism                                                                                 | Length |
|------------|-------------------------------------------|---------------------|------------------------------------------------------------------------------------------|--------|
| A0A0D7F839 | General secretion pathway protein GspD    | UM91_18010          | <i>Pseudomonas oryzihabitans</i>                                                         | 668    |
| A0A1M6MRL4 | Type II secretion system protein D (GspD) | SAMN05192556_101139 | <i>Halomonas sinaiensis</i>                                                              | 695    |
| E1V5E8     | General secretion pathway protein GspD    | gspD2 HELO_3219     | <i>Halomonas elongata</i> (strain ATCC 33173 / DSM 2581 / NBRC 15536 / NCIMB 2198 / 1H9) | 700    |
| A0A059UT06 | General secretion pathway protein D       | DW66_1038           | <i>Pseudomonas putida</i> ( <i>Arthrobacter siderocapsulatus</i> )                       | 587    |
| A0A061JU99 | General secretion pathway protein D       | B597_001430         | <i>Pseudomonas stutzeri</i> KOS6                                                         | 646    |
| A0A067A6W0 | Type II secretion system protein D        | gspD BV82_0433      | <i>Pseudomonas</i> sp. P482                                                              | 650    |
| A0A075P6X1 | General secretion pathway protein GspD    | HZ99_04795          | <i>Pseudomonas fluorescens</i>                                                           | 647    |
| A0A077LH04 | Type II secretion system protein D        | PSCI_2484           | <i>Pseudomonas</i> sp. StFLB209                                                          | 648    |
| A0A085VFX0 | General secretion pathway protein GspD    | IV01_16380          | <i>Pseudomonas syringae</i>                                                              | 648    |
| A0A088NNN4 | General secretion pathway protein GspD    | O165_017680         | <i>Pseudomonas mosselii</i> SJ10                                                         | 649    |
| A0A0A7JNJ7 | General secretion pathway protein GspD    | NJ69_13450          | <i>Pseudomonas parafulva</i>                                                             | 651    |
| A0A0C5RLD8 | General secretion pathway protein GspD    | N805_17110          | <i>Pseudomonas putida</i> S13.1.2                                                        | 582    |
| A0A0D0L1I8 | General secretion pathway protein GspD    | RU08_01260          | <i>Pseudomonas fulva</i>                                                                 | 650    |
| A0A0D1M236 | General secretion pathway protein GspD    | QV12_05830          | <i>Pseudomonas putida</i> ( <i>Arthrobacter siderocapsulatus</i> )                       | 651    |
| A0A0F0FE79 | General secretion pathway protein GspD    | UB48_10240          | <i>Pseudomonas</i> sp. 2(2015)                                                           | 650    |
| A0A0M2UBF7 | General secretion pathway protein GspD    | V520_24840          | <i>Pseudomonas putida</i> KG-4                                                           | 581    |
| A0A0P7CFV6 | Type II secretion system protein GspD     | HB4184_22685        | <i>Pseudomonas putida</i> ( <i>Arthrobacter siderocapsulatus</i> )                       | 578    |
| A0A0Q5F937 | Type II secretion system protein GspD     | ASF84_25820         | <i>Pseudomonas</i> sp. Leaf127                                                           | 656    |
| A0A0U4VRS9 | Type II secretion system protein GspD     | APT59_16805         | <i>Pseudomonas oryzihabitans</i>                                                         | 670    |
| A0A101LN13 | Type II secretion system protein GspD     | AR540_08080         | <i>Pseudomonas</i> sp. EpS/L25                                                           | 647    |
| A0A126S8Z7 | General secretion pathway protein D       | AWT69_003970        | <i>Pseudomonas putida</i> ( <i>Arthrobacter siderocapsulatus</i> )                       | 650    |
| A0A160GLE3 | General secretion pathway protein GspD    | AB688_07905         | <i>Pseudomonas putida</i> ( <i>Arthrobacter siderocapsulatus</i> )                       | 651    |
| A0A176VA36 | Type II secretion system protein GspD     | A2T76_04975         | <i>Pseudomonas brenneri</i>                                                              | 647    |
| A0A178L352 | Type II secretion system protein GspD     | A4V15_09720         | <i>Pseudomonas oryzihabitans</i>                                                         | 669    |
| A0A1E2VEY3 | Type II secretion system protein GspD     | BFW38_16490         | <i>Terasakiispira papahanaumokuakeensis</i>                                              | 662    |
| A0A1E4UVV0 | Type II secretion system protein GspD     | A7D25_17035         | <i>Pseudomonas</i> sp. 21C1                                                              | 635    |
| A0A1H2MPS8 | General secretion pathway protein D       | SAMN04490181_2040   | <i>Pseudomonas brenneri</i>                                                              | 649    |
| A0A1H2MU36 | General secretion pathway protein D       | SAMN05216202_2392   | <i>Pseudomonas mucidolens</i>                                                            | 649    |
| A0A1H6DFV3 | General secretion pathway protein D       | SAMN05444390_10677  | <i>Marinobacterium lutimaris</i>                                                         | 584    |
| A0A1I3K0Q6 | General secretion pathway protein D       | SAMN05216602_2204   | <i>Pseudomonas argentinensis</i>                                                         | 650    |

|            |                                             |                    |                                                                    |     |
|------------|---------------------------------------------|--------------------|--------------------------------------------------------------------|-----|
| A0A1L7N8F3 | General secretion pathway protein D         | KF715C_ch11720     | <i>Pseudomonas putida</i> ( <i>Arthrobacter siderocapsulatus</i> ) | 588 |
| A0A1M7M962 | General secretion pathway protein D         | SAMN05660971_04104 | <i>Halomonas cupida</i>                                            | 697 |
| A0A1Q9XUL8 | Type II secretion system protein GspD       | BVH03_12020        | <i>Pseudomonas</i> sp. PA15(2017)                                  | 627 |
| B0KRF9     | General secretion pathway protein D         | PputGB1_1043       | <i>Pseudomonas putida</i> (strain GB-1)                            | 584 |
| B1JDL3     | General secretion pathway protein D         | PputW619_4180      | <i>Pseudomonas putida</i> (strain W619)                            | 650 |
| Q1I5W7     | Putative type II secretion system protein D | PSEEN4281          | <i>Pseudomonas entomophila</i> (strain L48)                        | 651 |
| Q52291     | XcpQ protein                                | xcpQ               | <i>Pseudomonas putida</i> ( <i>Arthrobacter siderocapsulatus</i> ) | 591 |
| T2HCF8     | Type II secretion system protein XcpQ       | xcpQ PP4_42700     | <i>Pseudomonas putida</i> NBRC 14164                               | 588 |
| U5VM15     | General secretion pathway protein D         | PVLB_19945         | <i>Pseudomonas</i> sp. VLB120                                      | 640 |
| W0HEV3     | Type II secretion system protein D          | PCH70_42170        | <i>Pseudomonas cichorii</i> JBC1                                   | 648 |
