# Supplementary material for: Structural Basis of Type 2 Secretion System Engagement between the Inner and Outer Bacterial Membranes
Source: PubMed Central journal article supplement (PMC5646249; doi:10.1128/mbio.01344-17), 2017-10-17
Supplement: mbo005173525st2.pdf [file mbo005173525st2.pdf]

## Supplemental Table S2 Model Parameters

### Data Collection

---

|                                   |         |
|-----------------------------------|---------|
| Particles                         | 18,005  |
| Pixel size                        | 0.53    |
| Defocus range                     | 0.6-2.5 |
| Voltage (kV)                      | 300     |
| Electron Dose (e/Å <sup>2</sup> ) | 40      |

---

### Refinement

---

|    |       |
|----|-------|
| CC | 0.723 |
|----|-------|

---

### Model Quality

---

|                            |             |
|----------------------------|-------------|
| RMSD                       |             |
| Bond length(Å)/Bond angles | 0.009/1.379 |
| Ramachandran               |             |
| Favoured (%)               | 89.12       |
| Outliers (%)               | 0.0         |
| Rotamer outliers           | 0.31        |
| C-beta deviations          | 0           |
| Clashscore                 | 7.2         |

---
